# Supplementary material for: CRB3 navigates Rab11 trafficking vesicles to promote γTuRC assembly during ciliogenesis
Source: bioRxiv preprint, doi:10.1101/2023.02.15.528649, version 5 (2023-09-04)
Supplement: Figure 5-Source data 1 [file 528649_file17.xlsx]

## Sheet: proteins
Accession	-10lgP	Coverage (%)	Area Sample 1	#Peptides	#Unique	#Spec Sample 1	Avg. Mass	Description
sp|P35579|MYH9_HUMAN	474.41	76	4771900000	220	182	508	226530	Myosin-9 OS=Homo sapiens OX=9606 GN=MYH9 PE=1 SV=4
sp|P04264|K2C1_HUMAN	375.89	67	1490900000	63	37	140	66039	Keratin type II cytoskeletal 1 OS=Homo sapiens OX=9606 GN=KRT1 PE=1 SV=6
sp|P35527|K1C9_HUMAN	359.65	65	731080000	40	39	75	62064	Keratin type I cytoskeletal 9 OS=Homo sapiens OX=9606 GN=KRT9 PE=1 SV=3
sp|P35908|K22E_HUMAN	357.86	86	7213600	64	1	109	65433	Keratin type II cytoskeletal 2 epidermal OS=Homo sapiens OX=9606 GN=KRT2 PE=1 SV=2
sp|P13645|K1C10_HUMAN	357.41	60	1304300000	50	38	103	58827	Keratin type I cytoskeletal 10 OS=Homo sapiens OX=9606 GN=KRT10 PE=1 SV=6
sp|Q15149|PLEC_HUMAN	346.6	36	257700000	157	149	195	531796	Plectin OS=Homo sapiens OX=9606 GN=PLEC PE=1 SV=3
sp|P60709|ACTB_HUMAN	336.57	77	16886000	40	1	95	41737	Actin cytoplasmic 1 OS=Homo sapiens OX=9606 GN=ACTB PE=1 SV=1
sp|P63261|ACTG_HUMAN	334.98	77	2635100	40	1	92	41793	Actin cytoplasmic 2 OS=Homo sapiens OX=9606 GN=ACTG1 PE=1 SV=1
sp|P11216|PYGB_HUMAN	331.89	66	334860000	65	51	90	96696	Glycogen phosphorylase brain form OS=Homo sapiens OX=9606 GN=PYGB PE=1 SV=5
sp|P35580|MYH10_HUMAN	329.31	45	127720000	88	55	148	228997	Myosin-10 OS=Homo sapiens OX=9606 GN=MYH10 PE=1 SV=3
sp|P07437|TBB5_HUMAN	321.08	77	95419000	34	7	89	49671	Tubulin beta chain OS=Homo sapiens OX=9606 GN=TUBB PE=1 SV=2
sp|P04406|G3P_HUMAN	315.58	76	1265900000	31	31	101	36053	Glyceraldehyde-3-phosphate dehydrogenase OS=Homo sapiens OX=9606 GN=GAPDH PE=1 SV=3
sp|P68371|TBB4B_HUMAN	315.47	76	53434000	33	2	88	49831	Tubulin beta-4B chain OS=Homo sapiens OX=9606 GN=TUBB4B PE=1 SV=1
sp|P25705|ATPA_HUMAN	309.2	62	503850000	41	41	69	59751	ATP synthase subunit alpha mitochondrial OS=Homo sapiens OX=9606 GN=ATP5F1A PE=1 SV=1
sp|P02538|K2C6A_HUMAN	308.13	69	44525000	57	2	89	60045	Keratin type II cytoskeletal 6A OS=Homo sapiens OX=9606 GN=KRT6A PE=1 SV=3
sp|P49327|FAS_HUMAN	305.76	33	114070000	62	62	82	273424	Fatty acid synthase OS=Homo sapiens OX=9606 GN=FASN PE=1 SV=3
sp|Q04695|K1C17_HUMAN	304.56	70	199230000	48	23	62	48106	Keratin type I cytoskeletal 17 OS=Homo sapiens OX=9606 GN=KRT17 PE=1 SV=2
sp|Q9BQE3|TBA1C_HUMAN	302.52	64	12455000	32	2	67	49895	Tubulin alpha-1C chain OS=Homo sapiens OX=9606 GN=TUBA1C PE=1 SV=1
tr|F5H5D3|F5H5D3_HUMAN	302.52	55	12455000	32	2	67	57730	Tubulin alpha chain OS=Homo sapiens OX=9606 GN=TUBA1C PE=1 SV=1
sp|P04259|K2C6B_HUMAN	300.87	67	776390	54	1	86	60067	Keratin type II cytoskeletal 6B OS=Homo sapiens OX=9606 GN=KRT6B PE=1 SV=5
sp|P02533|K1C14_HUMAN	297.51	66	20846000	40	5	59	51562	Keratin type I cytoskeletal 14 OS=Homo sapiens OX=9606 GN=KRT14 PE=1 SV=4
sp|P08238|HS90B_HUMAN	291.37	54	180580000	43	28	66	83264	Heat shock protein HSP 90-beta OS=Homo sapiens OX=9606 GN=HSP90AB1 PE=1 SV=4
sp|P68366|TBA4A_HUMAN	290.56	63	17499000	29	6	62	49924	Tubulin alpha-4A chain OS=Homo sapiens OX=9606 GN=TUBA4A PE=1 SV=1
sp|P13647|K2C5_HUMAN	283.57	58	65259000	53	8	82	62378	Keratin type II cytoskeletal 5 OS=Homo sapiens OX=9606 GN=KRT5 PE=1 SV=3
sp|P47895|AL1A3_HUMAN	281.26	55	172970000	32	30	44	56109	Aldehyde dehydrogenase family 1 member A3 OS=Homo sapiens OX=9606 GN=ALDH1A3 PE=1 SV=2
sp|P02768|ALBU_HUMAN	276.83	60	256060000	35	29	49	69367	Serum albumin OS=Homo sapiens OX=9606 GN=ALB PE=1 SV=2
sp|P06576|ATPB_HUMAN	272.03	58	308760000	23	23	46	56560	ATP synthase subunit beta mitochondrial OS=Homo sapiens OX=9606 GN=ATP5F1B PE=1 SV=3
sp|Q13509|TBB3_HUMAN	267.02	46	10964000	22	2	63	50433	Tubulin beta-3 chain OS=Homo sapiens OX=9606 GN=TUBB3 PE=1 SV=2
sp|P08729|K2C7_HUMAN	266.66	64	82003000	40	21	51	51386	Keratin type II cytoskeletal 7 OS=Homo sapiens OX=9606 GN=KRT7 PE=1 SV=5
sp|P19474|RO52_HUMAN	264.62	49	364050000	32	32	52	54170	E3 ubiquitin-protein ligase TRIM21 OS=Homo sapiens OX=9606 GN=TRIM21 PE=1 SV=1
sp|Q9BUF5|TBB6_HUMAN	259.7	57	27790000	24	9	54	49857	Tubulin beta-6 chain OS=Homo sapiens OX=9606 GN=TUBB6 PE=1 SV=1
sp|P21796|VDAC1_HUMAN	258.07	78	128150000	22	21	30	30773	Voltage-dependent anion-selective channel protein 1 OS=Homo sapiens OX=9606 GN=VDAC1 PE=1 SV=2
sp|P22695|QCR2_HUMAN	254.91	53	109180000	22	22	35	48443	Cytochrome b-c1 complex subunit 2 mitochondrial OS=Homo sapiens OX=9606 GN=UQCRC2 PE=1 SV=3
sp|P01857|IGHG1_HUMAN	254.39	49	24665000	35	5	100	36106	Immunoglobulin heavy constant gamma 1 OS=Homo sapiens OX=9606 GN=IGHG1 PE=1 SV=1
tr|A0A0A0MS08|A0A0A0MS08_HUMAN	254.39	40	24665000	35	5	100	43912	Immunoglobulin heavy constant gamma 1 (Fragment) OS=Homo sapiens OX=9606 GN=IGHG1 PE=1 SV=1
tr|F5GZS6|F5GZS6_HUMAN	253.81	35	116090000	21	21	34	64873	4F2 cell-surface antigen heavy chain OS=Homo sapiens OX=9606 GN=SLC3A2 PE=1 SV=1
sp|P08195|4F2_HUMAN	253.81	33	116090000	21	21	34	67994	4F2 cell-surface antigen heavy chain OS=Homo sapiens OX=9606 GN=SLC3A2 PE=1 SV=3
tr|J3KPF3|J3KPF3_HUMAN	253.81	33	116090000	21	21	34	68101	4F2 cell-surface antigen heavy chain OS=Homo sapiens OX=9606 GN=SLC3A2 PE=1 SV=1
sp|Q9Y6N5|SQOR_HUMAN	253.08	69	145180000	29	29	41	49961	Sulfide:quinone oxidoreductase mitochondrial OS=Homo sapiens OX=9606 GN=SQOR PE=1 SV=1
sp|P68032|ACTC_HUMAN	248.37	35	94382000	25	2	61	42019	Actin alpha cardiac muscle 1 OS=Homo sapiens OX=9606 GN=ACTC1 PE=1 SV=1
sp|P68133|ACTS_HUMAN	248.37	35	94382000	25	2	61	42051	Actin alpha skeletal muscle OS=Homo sapiens OX=9606 GN=ACTA1 PE=1 SV=1
sp|P12236|ADT3_HUMAN	248.15	65	77253000	29	9	51	32866	ADP/ATP translocase 3 OS=Homo sapiens OX=9606 GN=SLC25A6 PE=1 SV=4
sp|P00338|LDHA_HUMAN	246.24	57	556910000	21	19	35	36689	L-lactate dehydrogenase A chain OS=Homo sapiens OX=9606 GN=LDHA PE=1 SV=2
sp|P05388|RLA0_HUMAN	245.08	53	61500000	14	14	17	34274	60S acidic ribosomal protein P0 OS=Homo sapiens OX=9606 GN=RPLP0 PE=1 SV=1
tr|F8VZY9|F8VZY9_HUMAN	242.74	59	151010000	28	20	48	43774	Keratin type I cytoskeletal 18 OS=Homo sapiens OX=9606 GN=KRT18 PE=1 SV=1
sp|P05783|K1C18_HUMAN	242.74	54	151010000	28	20	48	48058	Keratin type I cytoskeletal 18 OS=Homo sapiens OX=9606 GN=KRT18 PE=1 SV=2
sp|P05141|ADT2_HUMAN	241.33	63	82964000	26	8	48	32852	ADP/ATP translocase 2 OS=Homo sapiens OX=9606 GN=SLC25A5 PE=1 SV=7
sp|P08779|K1C16_HUMAN	240.97	42	11404000	27	5	37	51268	Keratin type I cytoskeletal 16 OS=Homo sapiens OX=9606 GN=KRT16 PE=1 SV=4
sp|P42224|STAT1_HUMAN	240.92	39	51961000	27	27	36	87335	Signal transducer and activator of transcription 1-alpha/beta OS=Homo sapiens OX=9606 GN=STAT1 PE=1 SV=2
sp|P23396|RS3_HUMAN	239.86	82	176390000	25	25	30	26688	40S ribosomal protein S3 OS=Homo sapiens OX=9606 GN=RPS3 PE=1 SV=2
sp|P19105|ML12A_HUMAN	235.89	67	130110000	12	7	22	19794	Myosin regulatory light chain 12A OS=Homo sapiens OX=9606 GN=MYL12A PE=1 SV=2
sp|O14950|ML12B_HUMAN	235.89	66	130110000	12	7	22	19779	Myosin regulatory light chain 12B OS=Homo sapiens OX=9606 GN=MYL12B PE=1 SV=2
tr|J3QRS3|J3QRS3_HUMAN	235.89	64	130110000	12	7	22	20457	Myosin regulatory light chain 12A OS=Homo sapiens OX=9606 GN=MYL12A PE=1 SV=1
sp|P05787|K2C8_HUMAN	235.73	50	45036000	35	15	53	53704	Keratin type II cytoskeletal 8 OS=Homo sapiens OX=9606 GN=KRT8 PE=1 SV=7
sp|P07900|HS90A_HUMAN	235.3	32	18773000	23	9	33	84660	Heat shock protein HSP 90-alpha OS=Homo sapiens OX=9606 GN=HSP90AA1 PE=1 SV=5
sp|P35749|MYH11_HUMAN	235.13	11	1814800	26	1	43	227337	Myosin-11 OS=Homo sapiens OX=9606 GN=MYH11 PE=1 SV=3
sp|P01860|IGHG3_HUMAN	235.13	33	11251000	25	3	63	41287	Immunoglobulin heavy constant gamma 3 OS=Homo sapiens OX=9606 GN=IGHG3 PE=1 SV=2
tr|A0A286YES1|A0A286YES1_HUMAN	235.13	28	11251000	25	3	63	49141	Immunoglobulin heavy constant gamma 3 (Fragment) OS=Homo sapiens OX=9606 GN=IGHG3 PE=1 SV=1
sp|P27824|CALX_HUMAN	234.94	36	119340000	21	21	32	67568	Calnexin OS=Homo sapiens OX=9606 GN=CANX PE=1 SV=2
sp|Q9H4M9|EHD1_HUMAN	233.06	41	40441000	26	17	34	60627	EH domain-containing protein 1 OS=Homo sapiens OX=9606 GN=EHD1 PE=1 SV=2
tr|A0A024R571|A0A024R571_HUMAN	233.06	40	40441000	26	17	34	61927	EH domain-containing protein 1 OS=Homo sapiens OX=9606 GN=EHD1 PE=1 SV=1
sp|Q01813|PFKAP_HUMAN	232.77	39	56119000	33	28	50	85596	ATP-dependent 6-phosphofructokinase platelet type OS=Homo sapiens OX=9606 GN=PFKP PE=1 SV=2
sp|Q8N3R9|MPP5_HUMAN	229.59	42	46059000	22	22	27	77294	MAGUK p55 subfamily member 5 OS=Homo sapiens OX=9606 GN=MPP5 PE=1 SV=3
sp|P68104|EF1A1_HUMAN	229.37	38	273870000	18	18	29	50141	Elongation factor 1-alpha 1 OS=Homo sapiens OX=9606 GN=EEF1A1 PE=1 SV=1
sp|Q5VTE0|EF1A3_HUMAN	229.37	38	273870000	18	18	29	50185	Putative elongation factor 1-alpha-like 3 OS=Homo sapiens OX=9606 GN=EEF1A1P5 PE=5 SV=1
sp|Q00610|CLH1_HUMAN	227.83	15	24541000	22	22	27	191613	Clathrin heavy chain 1 OS=Homo sapiens OX=9606 GN=CLTC PE=1 SV=5
tr|A0A087WVQ6|A0A087WVQ6_HUMAN	227.83	15	24541000	22	22	27	192057	Clathrin heavy chain OS=Homo sapiens OX=9606 GN=CLTC PE=1 SV=1
sp|P05023|AT1A1_HUMAN	226.73	27	50941000	26	26	30	112896	Sodium/potassium-transporting ATPase subunit alpha-1 OS=Homo sapiens OX=9606 GN=ATP1A1 PE=1 SV=1
sp|P10809|CH60_HUMAN	225.84	44	56810000	21	21	27	61055	60 kDa heat shock protein mitochondrial OS=Homo sapiens OX=9606 GN=HSPD1 PE=1 SV=2
sp|P40939|ECHA_HUMAN	225.38	29	32532000	21	20	30	83000	Trifunctional enzyme subunit alpha mitochondrial OS=Homo sapiens OX=9606 GN=HADHA PE=1 SV=2
tr|H0YFD6|H0YFD6_HUMAN	225.38	28	32532000	21	20	30	86372	Trifunctional enzyme subunit alpha mitochondrial OS=Homo sapiens OX=9606 GN=HADHA PE=1 SV=2
sp|Q6S8J3|POTEE_HUMAN	223.47	10	4350500	14	1	31	121363	POTE ankyrin domain family member E OS=Homo sapiens OX=9606 GN=POTEE PE=2 SV=3
sp|Q9NZM1|MYOF_HUMAN	220.87	18	31464000	31	31	37	234706	Myoferlin OS=Homo sapiens OX=9606 GN=MYOF PE=1 SV=1
sp|P04843|RPN1_HUMAN	220.29	51	48869000	22	22	28	68569	Dolichyl-diphosphooligosaccharide--protein glycosyltransferase subunit 1 OS=Homo sapiens OX=9606 GN=RPN1 PE=1 SV=1
sp|P63244|RACK1_HUMAN	219.97	73	133250000	19	19	26	35077	Receptor of activated protein C kinase 1 OS=Homo sapiens OX=9606 GN=RACK1 PE=1 SV=3
sp|P36578|RL4_HUMAN	218.58	44	55563000	20	20	26	47697	60S ribosomal protein L4 OS=Homo sapiens OX=9606 GN=RPL4 PE=1 SV=5
sp|P49411|EFTU_HUMAN	215.7	46	58725000	17	17	24	49542	Elongation factor Tu mitochondrial OS=Homo sapiens OX=9606 GN=TUFM PE=1 SV=2
sp|P78527|PRKDC_HUMAN	214.56	10	46563000	37	37	44	469093	DNA-dependent protein kinase catalytic subunit OS=Homo sapiens OX=9606 GN=PRKDC PE=1 SV=3
sp|P06737|PYGL_HUMAN	212.93	32	12570000	28	17	38	97149	Glycogen phosphorylase liver form OS=Homo sapiens OX=9606 GN=PYGL PE=1 SV=4
sp|P15924|DESP_HUMAN	210.79	15	45980000	40	39	47	331774	Desmoplakin OS=Homo sapiens OX=9606 GN=DSP PE=1 SV=3
sp|P07814|SYEP_HUMAN	209.42	26	24008000	28	28	35	170590	Bifunctional glutamate/proline--tRNA ligase OS=Homo sapiens OX=9606 GN=EPRS PE=1 SV=5
sp|P61247|RS3A_HUMAN	207.13	68	56834000	20	20	35	29945	40S ribosomal protein S3a OS=Homo sapiens OX=9606 GN=RPS3A PE=1 SV=2
sp|P12235|ADT1_HUMAN	206.87	45	6365500	18	3	35	33065	ADP/ATP translocase 1 OS=Homo sapiens OX=9606 GN=SLC25A4 PE=1 SV=4
tr|F8W1R7|F8W1R7_HUMAN	206.31	78	504600000	12	12	28	16290	Myosin light polypeptide 6 OS=Homo sapiens OX=9606 GN=MYL6 PE=1 SV=1
sp|P60660|MYL6_HUMAN	206.31	75	504600000	12	12	28	16930	Myosin light polypeptide 6 OS=Homo sapiens OX=9606 GN=MYL6 PE=1 SV=2
tr|J3KND3|J3KND3_HUMAN	206.31	74	504600000	12	12	28	17058	Myosin light polypeptide 6 OS=Homo sapiens OX=9606 GN=MYL6 PE=1 SV=1
tr|G8JLA2|G8JLA2_HUMAN	206.31	74	504600000	12	12	28	17089	Myosin light polypeptide 6 OS=Homo sapiens OX=9606 GN=MYL6 PE=1 SV=1
tr|G3V1V0|G3V1V0_HUMAN	206.31	70	504600000	12	12	28	18037	Myosin light polypeptide 6 OS=Homo sapiens OX=9606 GN=MYL6 PE=1 SV=1
sp|Q99623|PHB2_HUMAN	204.98	51	84822000	15	14	17	33296	Prohibitin-2 OS=Homo sapiens OX=9606 GN=PHB2 PE=1 SV=2
sp|P07195|LDHB_HUMAN	204.39	37	192920000	13	11	17	36639	L-lactate dehydrogenase B chain OS=Homo sapiens OX=9606 GN=LDHB PE=1 SV=2
sp|Q07065|CKAP4_HUMAN	204.31	36	19579000	16	15	16	66023	Cytoskeleton-associated protein 4 OS=Homo sapiens OX=9606 GN=CKAP4 PE=1 SV=2
sp|P11021|BIP_HUMAN	201.25	28	16830000	14	13	22	72333	Endoplasmic reticulum chaperone BiP OS=Homo sapiens OX=9606 GN=HSPA5 PE=1 SV=2
tr|A0A0A0MS51|A0A0A0MS51_HUMAN	200.85	28	15079000	20	8	21	82526	Gelsolin OS=Homo sapiens OX=9606 GN=GSN PE=1 SV=1
tr|A0A0A0MT01|A0A0A0MT01_HUMAN	200.85	27	15079000	20	8	21	84745	Gelsolin OS=Homo sapiens OX=9606 GN=GSN PE=1 SV=1
sp|P06396|GELS_HUMAN	200.85	27	15079000	20	8	21	85697	Gelsolin OS=Homo sapiens OX=9606 GN=GSN PE=1 SV=1
sp|P56545|CTBP2_HUMAN	200.09	37	60778000	19	11	21	48945	C-terminal-binding protein 2 OS=Homo sapiens OX=9606 GN=CTBP2 PE=1 SV=1
sp|Q9Y262|EIF3L_HUMAN	198.86	29	18137000	16	16	20	66727	Eukaryotic translation initiation factor 3 subunit L OS=Homo sapiens OX=9606 GN=EIF3L PE=1 SV=1
tr|B0QY89|B0QY89_HUMAN	198.86	27	18137000	16	16	20	70902	Eukaryotic translation initiation factor 3 subunit L OS=Homo sapiens OX=9606 GN=EIF3L PE=1 SV=1
sp|Q08211|DHX9_HUMAN	198.75	11	10694000	11	11	12	140958	ATP-dependent RNA helicase A OS=Homo sapiens OX=9606 GN=DHX9 PE=1 SV=4
sp|P16144|ITB4_HUMAN	198.61	12	27454000	21	20	24	202166	Integrin beta-4 OS=Homo sapiens OX=9606 GN=ITGB4 PE=1 SV=5
sp|P67936|TPM4_HUMAN	198.49	67	9736300	19	7	32	28522	Tropomyosin alpha-4 chain OS=Homo sapiens OX=9606 GN=TPM4 PE=1 SV=3
tr|A0A2R8Y5V9|A0A2R8Y5V9_HUMAN	198.49	67	9736300	19	7	32	28609	Tropomyosin alpha-4 chain OS=Homo sapiens OX=9606 GN=TPM4 PE=1 SV=1
tr|E9PLK3|E9PLK3_HUMAN	197.57	28	40845000	21	21	26	102988	Aminopeptidase OS=Homo sapiens OX=9606 GN=NPEPPS PE=1 SV=1
sp|P55786|PSA_HUMAN	197.57	28	40845000	21	21	26	103276	Puromycin-sensitive aminopeptidase OS=Homo sapiens OX=9606 GN=NPEPPS PE=1 SV=2
sp|Q9NR12|PDLI7_HUMAN	196.17	50	34238000	16	16	27	49845	PDZ and LIM domain protein 7 OS=Homo sapiens OX=9606 GN=PDLIM7 PE=1 SV=1
tr|A7XZE4|A7XZE4_HUMAN	195.41	38	1501300	16	2	29	33026	Beta tropomyosin isoform OS=Homo sapiens OX=9606 GN=TPM2 PE=1 SV=1
tr|Q5TCU3|Q5TCU3_HUMAN	195.41	35	1219900	15	1	28	32815	Tropomyosin beta chain OS=Homo sapiens OX=9606 GN=TPM2 PE=1 SV=1
sp|P07951|TPM2_HUMAN	195.41	35	1219900	15	1	28	32851	Tropomyosin beta chain OS=Homo sapiens OX=9606 GN=TPM2 PE=1 SV=1
tr|Q5TCU8|Q5TCU8_HUMAN	195.41	30	1219900	15	1	28	36747	Tropomyosin beta chain OS=Homo sapiens OX=9606 GN=TPM2 PE=1 SV=1
sp|P35232|PHB_HUMAN	195.01	64	75379000	17	17	26	29804	Prohibitin OS=Homo sapiens OX=9606 GN=PHB PE=1 SV=1
sp|P05556|ITB1_HUMAN	194.99	18	44896000	14	13	17	88415	Integrin beta-1 OS=Homo sapiens OX=9606 GN=ITGB1 PE=1 SV=2
sp|P07355|ANXA2_HUMAN	192.95	52	26830000	15	15	19	38604	Annexin A2 OS=Homo sapiens OX=9606 GN=ANXA2 PE=1 SV=2
sp|P04792|HSPB1_HUMAN	192.94	72	111730000	12	12	17	22783	Heat shock protein beta-1 OS=Homo sapiens OX=9606 GN=HSPB1 PE=1 SV=2
sp|O75369|FLNB_HUMAN	190.69	10	15967000	21	19	22	278162	Filamin-B OS=Homo sapiens OX=9606 GN=FLNB PE=1 SV=2
tr|J3KR24|J3KR24_HUMAN	190.55	16	18742000	17	17	18	131763	Isoleucine--tRNA ligase cytoplasmic OS=Homo sapiens OX=9606 GN=IARS PE=1 SV=1
sp|P41252|SYIC_HUMAN	190.55	15	18742000	17	17	18	144498	Isoleucine--tRNA ligase cytoplasmic OS=Homo sapiens OX=9606 GN=IARS PE=1 SV=2
tr|A0A0X1KG69|A0A0X1KG69_HUMAN	190.25	16	12619000	13	13	13	129984	InaD-like protein OS=Homo sapiens OX=9606 GN=PATJ PE=1 SV=1
tr|A0A087WUZ6|A0A087WUZ6_HUMAN	190.25	16	12619000	13	13	13	130081	InaD-like protein OS=Homo sapiens OX=9606 GN=PATJ PE=1 SV=1
sp|Q8NI35|INADL_HUMAN	190.25	11	12619000	14	13	14	196367	InaD-like protein OS=Homo sapiens OX=9606 GN=PATJ PE=1 SV=3
tr|A0A2R8Y549|A0A2R8Y549_HUMAN	190.25	10	12619000	14	13	14	204696	InaD-like protein OS=Homo sapiens OX=9606 GN=PATJ PE=1 SV=1
tr|H7BYY1|H7BYY1_HUMAN	188.68	38	2834100	15	1	28	28747	Tropomyosin 1 (Alpha) isoform CRA_m OS=Homo sapiens OX=9606 GN=TPM1 PE=1 SV=1
tr|F5H7S3|F5H7S3_HUMAN	188.68	36	2834100	14	1	27	28525	Tropomyosin alpha-1 chain OS=Homo sapiens OX=9606 GN=TPM1 PE=1 SV=2
tr|B7Z596|B7Z596_HUMAN	188.68	32	2834100	14	1	27	31753	Tropomyosin alpha-1 chain OS=Homo sapiens OX=9606 GN=TPM1 PE=1 SV=1
sp|P11142|HSP7C_HUMAN	187.98	32	39892000	17	15	19	70898	Heat shock cognate 71 kDa protein OS=Homo sapiens OX=9606 GN=HSPA8 PE=1 SV=1
tr|A0A286YFJ8|A0A286YFJ8_HUMAN	187.52	33	1150500000	25	9	80	43832	Immunoglobulin heavy constant gamma 4 (Fragment) OS=Homo sapiens OX=9606 GN=IGHG4 PE=1 SV=1
sp|P01861|IGHG4_HUMAN	187.52	40	1150500000	25	9	80	35941	Immunoglobulin heavy constant gamma 4 OS=Homo sapiens OX=9606 GN=IGHG4 PE=1 SV=1
tr|H0YKU1|H0YKU1_HUMAN	187.36	57	17621000	9	9	11	20910	Tropomodulin-3 (Fragment) OS=Homo sapiens OX=9606 GN=TMOD3 PE=1 SV=1
tr|H0YNJ8|H0YNJ8_HUMAN	187.36	50	17621000	9	9	11	23812	Tropomodulin-3 OS=Homo sapiens OX=9606 GN=TMOD3 PE=1 SV=1
sp|Q9NYL9|TMOD3_HUMAN	187.36	30	17621000	9	9	11	39595	Tropomodulin-3 OS=Homo sapiens OX=9606 GN=TMOD3 PE=1 SV=1
sp|Q86VP6|CAND1_HUMAN	187.19	15	8928800	16	16	16	136375	Cullin-associated NEDD8-dissociated protein 1 OS=Homo sapiens OX=9606 GN=CAND1 PE=1 SV=2
sp|Q9NVI7|ATD3A_HUMAN	186.93	33	959250	19	1	20	71369	ATPase family AAA domain-containing protein 3A OS=Homo sapiens OX=9606 GN=ATAD3A PE=1 SV=2
sp|P62424|RL7A_HUMAN	185.94	45	41625000	13	13	15	29996	60S ribosomal protein L7a OS=Homo sapiens OX=9606 GN=RPL7A PE=1 SV=2
sp|Q02878|RL6_HUMAN	185.67	40	41066000	11	11	16	32728	60S ribosomal protein L6 OS=Homo sapiens OX=9606 GN=RPL6 PE=1 SV=3
sp|Q00325|MPCP_HUMAN	185.09	33	6992300	14	2	21	40095	Phosphate carrier protein mitochondrial OS=Homo sapiens OX=9606 GN=SLC25A3 PE=1 SV=2
sp|P14618|KPYM_HUMAN	184.82	38	38315000	15	15	19	57937	Pyruvate kinase PKM OS=Homo sapiens OX=9606 GN=PKM PE=1 SV=4
sp|P02786|TFR1_HUMAN	184.56	22	10605000	13	13	13	84871	Transferrin receptor protein 1 OS=Homo sapiens OX=9606 GN=TFRC PE=1 SV=2
sp|P29508|SPB3_HUMAN	184.41	35	26373000	13	12	16	44565	Serpin B3 OS=Homo sapiens OX=9606 GN=SERPINB3 PE=1 SV=2
sp|Q53GQ0|DHB12_HUMAN	184.34	34	43664000	10	10	11	34324	Very-long-chain 3-oxoacyl-CoA reductase OS=Homo sapiens OX=9606 GN=HSD17B12 PE=1 SV=2
sp|P12035|K2C3_HUMAN	183.94	15	56725	19	1	30	64417	Keratin type II cytoskeletal 3 OS=Homo sapiens OX=9606 GN=KRT3 PE=1 SV=3
sp|Q86YZ3|HORN_HUMAN	183.64	5	24391000	9	9	10	282389	Hornerin OS=Homo sapiens OX=9606 GN=HRNR PE=1 SV=2
tr|A0A0A0MR02|A0A0A0MR02_HUMAN	183.09	37	58553000	9	9	12	30348	Voltage-dependent anion-selective channel protein 2 (Fragment) OS=Homo sapiens OX=9606 GN=VDAC2 PE=1 SV=1
sp|P45880|VDAC2_HUMAN	183.09	35	58553000	9	9	12	31567	Voltage-dependent anion-selective channel protein 2 OS=Homo sapiens OX=9606 GN=VDAC2 PE=1 SV=2
tr|F8VVM2|F8VVM2_HUMAN	182.46	38	7891800	13	1	20	36161	Phosphate carrier protein mitochondrial OS=Homo sapiens OX=9606 GN=SLC25A3 PE=1 SV=1
sp|P55084|ECHB_HUMAN	181.87	38	35726000	15	15	23	51294	Trifunctional enzyme subunit beta mitochondrial OS=Homo sapiens OX=9606 GN=HADHB PE=1 SV=3
sp|P52597|HNRPF_HUMAN	181.74	26	7237500	7	5	11	45672	Heterogeneous nuclear ribonucleoprotein F OS=Homo sapiens OX=9606 GN=HNRNPF PE=1 SV=3
sp|Q7Z406|MYH14_HUMAN	180.36	8	0	16	1	27	227868	Myosin-14 OS=Homo sapiens OX=9606 GN=MYH14 PE=1 SV=2
sp|P16615|AT2A2_HUMAN	180.29	14	12989000	13	13	17	114757	Sarcoplasmic/endoplasmic reticulum calcium ATPase 2 OS=Homo sapiens OX=9606 GN=ATP2A2 PE=1 SV=1
sp|P48047|ATPO_HUMAN	180.27	45	32255000	9	9	12	23277	ATP synthase subunit O mitochondrial OS=Homo sapiens OX=9606 GN=ATP5PO PE=1 SV=1
sp|P36542|ATPG_HUMAN	179.74	28	35844000	10	10	14	32996	ATP synthase subunit gamma mitochondrial OS=Homo sapiens OX=9606 GN=ATP5F1C PE=1 SV=1
sp|P04844|RPN2_HUMAN	178.72	18	13709000	7	7	8	69284	Dolichyl-diphosphooligosaccharide--protein glycosyltransferase subunit 2 OS=Homo sapiens OX=9606 GN=RPN2 PE=1 SV=3
sp|Q14204|DYHC1_HUMAN	176.51	7	23427000	28	28	31	532412	Cytoplasmic dynein 1 heavy chain 1 OS=Homo sapiens OX=9606 GN=DYNC1H1 PE=1 SV=5
sp|P15144|AMPN_HUMAN	175.99	23	39843000	20	20	27	109539	Aminopeptidase N OS=Homo sapiens OX=9606 GN=ANPEP PE=1 SV=4
sp|P51149|RAB7A_HUMAN	175.97	60	18253000	9	9	10	23490	Ras-related protein Rab-7a OS=Homo sapiens OX=9606 GN=RAB7A PE=1 SV=1
tr|M0R0F0|M0R0F0_HUMAN	175.52	46	32072000	12	12	14	22391	40S ribosomal protein S5 (Fragment) OS=Homo sapiens OX=9606 GN=RPS5 PE=1 SV=1
sp|P46782|RS5_HUMAN	175.52	45	32072000	12	12	14	22876	40S ribosomal protein S5 OS=Homo sapiens OX=9606 GN=RPS5 PE=1 SV=4
tr|M0R0R2|M0R0R2_HUMAN	175.52	41	32072000	12	12	14	25333	40S ribosomal protein S5 OS=Homo sapiens OX=9606 GN=RPS5 PE=1 SV=1
sp|P14923|PLAK_HUMAN	174.9	18	9649800	14	11	18	81745	Junction plakoglobin OS=Homo sapiens OX=9606 GN=JUP PE=1 SV=3
sp|P62241|RS8_HUMAN	174.55	45	34479000	10	10	11	24205	40S ribosomal protein S8 OS=Homo sapiens OX=9606 GN=RPS8 PE=1 SV=2
tr|Q5JR95|Q5JR95_HUMAN	174.55	50	34479000	10	10	11	21880	40S ribosomal protein S8 OS=Homo sapiens OX=9606 GN=RPS8 PE=1 SV=1
sp|O14980|XPO1_HUMAN	173.49	15	6323700	14	13	14	123386	Exportin-1 OS=Homo sapiens OX=9606 GN=XPO1 PE=1 SV=1
sp|P24844|MYL9_HUMAN	173.47	44	321310	6	1	14	19827	Myosin regulatory light polypeptide 9 OS=Homo sapiens OX=9606 GN=MYL9 PE=1 SV=4
sp|O95573|ACSL3_HUMAN	173.14	20	11341000	11	10	15	80420	Long-chain-fatty-acid--CoA ligase 3 OS=Homo sapiens OX=9606 GN=ACSL3 PE=1 SV=3
sp|P01699|LV144_HUMAN	173.02	29	21294000	17	7	31	12201	Immunoglobulin lambda variable 1-44 OS=Homo sapiens OX=9606 GN=IGLV1-44 PE=1 SV=2
sp|P18124|RL7_HUMAN	172.56	40	36818000	12	12	18	29226	60S ribosomal protein L7 OS=Homo sapiens OX=9606 GN=RPL7 PE=1 SV=1
tr|A8MUD9|A8MUD9_HUMAN	172.56	38	36119000	10	10	15	24433	60S ribosomal protein L7 OS=Homo sapiens OX=9606 GN=RPL7 PE=1 SV=1
sp|P62269|RS18_HUMAN	172.05	54	31560000	12	12	14	17719	40S ribosomal protein S18 OS=Homo sapiens OX=9606 GN=RPS18 PE=1 SV=3
sp|P11586|C1TC_HUMAN	171.19	18	12549000	14	14	16	101559	C-1-tetrahydrofolate synthase cytoplasmic OS=Homo sapiens OX=9606 GN=MTHFD1 PE=1 SV=3
tr|F5H2F4|F5H2F4_HUMAN	171.19	17	12549000	14	14	16	110613	C-1-tetrahydrofolate synthase cytoplasmic OS=Homo sapiens OX=9606 GN=MTHFD1 PE=1 SV=1
sp|P62701|RS4X_HUMAN	171.16	42	58148000	12	12	27	29598	40S ribosomal protein S4 X isoform OS=Homo sapiens OX=9606 GN=RPS4X PE=1 SV=2
sp|Q16822|PCKGM_HUMAN	170.63	21	20167000	13	13	18	70699	Phosphoenolpyruvate carboxykinase [GTP] mitochondrial OS=Homo sapiens OX=9606 GN=PCK2 PE=1 SV=4
tr|A6NKB8|A6NKB8_HUMAN	170.39	23	11332000	12	12	16	68169	Aminopeptidase B OS=Homo sapiens OX=9606 GN=RNPEP PE=1 SV=1
sp|Q9H4A4|AMPB_HUMAN	170.39	21	11332000	12	12	16	72596	Aminopeptidase B OS=Homo sapiens OX=9606 GN=RNPEP PE=1 SV=2
sp|P01008|ANT3_HUMAN	170.34	22	35127000	14	6	24	52602	Antithrombin-III OS=Homo sapiens OX=9606 GN=SERPINC1 PE=1 SV=1
sp|O75083|WDR1_HUMAN	169.41	26	21818000	9	9	16	66194	WD repeat-containing protein 1 OS=Homo sapiens OX=9606 GN=WDR1 PE=1 SV=4
sp|P01859|IGHG2_HUMAN	168.88	38	2288400	22	2	70	35901	Immunoglobulin heavy constant gamma 2 OS=Homo sapiens OX=9606 GN=IGHG2 PE=1 SV=2
tr|A0A286YEY4|A0A286YEY4_HUMAN	168.88	31	2288400	22	2	70	43806	Immunoglobulin heavy constant gamma 2 (Fragment) OS=Homo sapiens OX=9606 GN=IGHG2 PE=1 SV=1
sp|P26006|ITA3_HUMAN	167.56	10	14967000	10	10	11	116612	Integrin alpha-3 OS=Homo sapiens OX=9606 GN=ITGA3 PE=1 SV=5
sp|P60842|IF4A1_HUMAN	167.49	31	18278000	11	11	13	46154	Eukaryotic initiation factor 4A-I OS=Homo sapiens OX=9606 GN=EIF4A1 PE=1 SV=1
sp|O60664|PLIN3_HUMAN	167.39	22	8704400	6	6	10	47075	Perilipin-3 OS=Homo sapiens OX=9606 GN=PLIN3 PE=1 SV=3
sp|P31943|HNRH1_HUMAN	167.04	21	6348000	6	4	14	49229	Heterogeneous nuclear ribonucleoprotein H OS=Homo sapiens OX=9606 GN=HNRNPH1 PE=1 SV=4
tr|G8JLB6|G8JLB6_HUMAN	167.04	20	6348000	6	4	14	51230	Heterogeneous nuclear ribonucleoprotein H OS=Homo sapiens OX=9606 GN=HNRNPH1 PE=1 SV=1
sp|P00403|COX2_HUMAN	166.6	26	34252000	6	6	12	25565	Cytochrome c oxidase subunit 2 OS=Homo sapiens OX=9606 GN=MT-CO2 PE=1 SV=1
sp|P23229|ITA6_HUMAN	166.3	15	18462000	15	15	21	126605	Integrin alpha-6 OS=Homo sapiens OX=9606 GN=ITGA6 PE=1 SV=5
tr|A0A075B730|A0A075B730_HUMAN	166.18	5	8606200	20	14	24	553139	Epiplakin OS=Homo sapiens OX=9606 GN=EPPK1 PE=1 SV=2
sp|P58107|EPIPL_HUMAN	166.18	5	8606200	20	14	24	555666	Epiplakin OS=Homo sapiens OX=9606 GN=EPPK1 PE=1 SV=3
sp|Q9H223|EHD4_HUMAN	166.11	27	9197800	12	9	15	61175	EH domain-containing protein 4 OS=Homo sapiens OX=9606 GN=EHD4 PE=1 SV=1
sp|O43242|PSMD3_HUMAN	166.08	26	9407400	11	11	12	60978	26S proteasome non-ATPase regulatory subunit 3 OS=Homo sapiens OX=9606 GN=PSMD3 PE=1 SV=2
sp|P62249|RS16_HUMAN	164.73	60	140500000	13	13	18	16445	40S ribosomal protein S16 OS=Homo sapiens OX=9606 GN=RPS16 PE=1 SV=2
tr|E7ESP4|E7ESP4_HUMAN	164.56	14	19484000	12	12	14	102827	Integrin alpha-2 OS=Homo sapiens OX=9606 GN=ITGA2 PE=1 SV=1
sp|P17301|ITA2_HUMAN	164.56	11	19484000	12	12	14	129295	Integrin alpha-2 OS=Homo sapiens OX=9606 GN=ITGA2 PE=1 SV=1
tr|M0R117|M0R117_HUMAN	164.27	55	20256000	10	10	10	18079	60S ribosomal protein L18a OS=Homo sapiens OX=9606 GN=RPL18A PE=1 SV=1
sp|Q02543|RL18A_HUMAN	164.27	48	20256000	10	10	10	20762	60S ribosomal protein L18a OS=Homo sapiens OX=9606 GN=RPL18A PE=1 SV=2
tr|M0R3D6|M0R3D6_HUMAN	164.27	55	19591000	9	9	9	16715	60S ribosomal protein L18a (Fragment) OS=Homo sapiens OX=9606 GN=RPL18A PE=1 SV=1
tr|M0R1A7|M0R1A7_HUMAN	164.27	52	19591000	9	9	9	17477	60S ribosomal protein L18a OS=Homo sapiens OX=9606 GN=RPL18A PE=1 SV=1
sp|P14868|SYDC_HUMAN	163.22	31	11071000	14	14	15	57136	Aspartate--tRNA ligase cytoplasmic OS=Homo sapiens OX=9606 GN=DARS PE=1 SV=2
tr|I3L1P8|I3L1P8_HUMAN	163.16	34	11898000	8	8	10	32182	Mitochondrial 2-oxoglutarate/malate carrier protein (Fragment) OS=Homo sapiens OX=9606 GN=SLC25A11 PE=1 SV=1
sp|Q02978|M2OM_HUMAN	163.16	32	11898000	8	8	10	34062	Mitochondrial 2-oxoglutarate/malate carrier protein OS=Homo sapiens OX=9606 GN=SLC25A11 PE=1 SV=3
sp|Q969V3|NCLN_HUMAN	162.77	24	8222900	10	10	11	62974	Nicalin OS=Homo sapiens OX=9606 GN=NCLN PE=1 SV=2
sp|P38646|GRP75_HUMAN	162.51	19	9131700	11	11	14	73681	Stress-70 protein mitochondrial OS=Homo sapiens OX=9606 GN=HSPA9 PE=1 SV=2
tr|A0A0C4DGS1|A0A0C4DGS1_HUMAN	162.33	22	26435000	9	9	10	48799	Dolichyl-diphosphooligosaccharide--protein glycosyltransferase 48 kDa subunit OS=Homo sapiens OX=9606 GN=DDOST PE=1 SV=1
sp|P39656|OST48_HUMAN	162.33	21	26435000	9	9	10	50801	Dolichyl-diphosphooligosaccharide--protein glycosyltransferase 48 kDa subunit OS=Homo sapiens OX=9606 GN=DDOST PE=1 SV=4
sp|P35613|BASI_HUMAN	160.53	26	19520000	7	6	9	42200	Basigin OS=Homo sapiens OX=9606 GN=BSG PE=1 SV=2
tr|A0A087X106|A0A087X106_HUMAN	160.47	13	2111000	6	3	8	53116	Keratin type II cuticular Hb1 OS=Homo sapiens OX=9606 GN=KRT81 PE=1 SV=1
sp|Q14533|KRT81_HUMAN	160.47	13	2111000	6	3	8	54928	Keratin type II cuticular Hb1 OS=Homo sapiens OX=9606 GN=KRT81 PE=1 SV=3
sp|O43790|KRT86_HUMAN	160.47	13	2111000	6	3	8	53501	Keratin type II cuticular Hb6 OS=Homo sapiens OX=9606 GN=KRT86 PE=1 SV=1
sp|P62277|RS13_HUMAN	160.25	44	29469000	10	10	13	17222	40S ribosomal protein S13 OS=Homo sapiens OX=9606 GN=RPS13 PE=1 SV=2
tr|B0YJC4|B0YJC4_HUMAN	159.7	36	10547000	13	9	14	49653	Vimentin variant 3 OS=Homo sapiens OX=9606 GN=VIM PE=1 SV=1
sp|P08670|VIME_HUMAN	159.7	33	10547000	13	9	14	53652	Vimentin OS=Homo sapiens OX=9606 GN=VIM PE=1 SV=4
tr|A0A087WTT1|A0A087WTT1_HUMAN	159.04	24	6584200	11	11	11	58536	Polyadenylate-binding protein OS=Homo sapiens OX=9606 GN=PABPC1 PE=1 SV=1
sp|P11940|PABP1_HUMAN	159.04	20	6584200	11	11	11	70671	Polyadenylate-binding protein 1 OS=Homo sapiens OX=9606 GN=PABPC1 PE=1 SV=2
sp|P13639|EF2_HUMAN	158.91	16	21243000	11	11	11	95338	Elongation factor 2 OS=Homo sapiens OX=9606 GN=EEF2 PE=1 SV=4
sp|P54136|SYRC_HUMAN	158.16	23	18864000	13	13	14	75379	Arginine--tRNA ligase cytoplasmic OS=Homo sapiens OX=9606 GN=RARS PE=1 SV=2
sp|P17655|CAN2_HUMAN	156.62	15	21336000	11	11	12	79995	Calpain-2 catalytic subunit OS=Homo sapiens OX=9606 GN=CAPN2 PE=1 SV=6
sp|P10412|H14_HUMAN	156.47	32	18566000	9	7	20	21865	Histone H1.4 OS=Homo sapiens OX=9606 GN=HIST1H1E PE=1 SV=2
tr|C9JZR2|C9JZR2_HUMAN	155.69	13	14227000	12	12	18	104848	Catenin delta-1 OS=Homo sapiens OX=9606 GN=CTNND1 PE=1 SV=2
sp|O60716|CTND1_HUMAN	155.69	12	14227000	12	12	18	108170	Catenin delta-1 OS=Homo sapiens OX=9606 GN=CTNND1 PE=1 SV=1
sp|P01023|A2MG_HUMAN	155.28	10	6869100	14	5	17	163290	Alpha-2-macroglobulin OS=Homo sapiens OX=9606 GN=A2M PE=1 SV=3
tr|F5H6E2|F5H6E2_HUMAN	155.1	11	7635100	12	12	14	118994	Unconventional myosin-Ic OS=Homo sapiens OX=9606 GN=MYO1C PE=1 SV=1
sp|O00159|MYO1C_HUMAN	155.1	11	7635100	12	12	14	121682	Unconventional myosin-Ic OS=Homo sapiens OX=9606 GN=MYO1C PE=1 SV=4
tr|A0A0G2JI36|A0A0G2JI36_HUMAN	153.62	43	615840	9	1	12	34216	HLA class I histocompatibility antigen A-3 alpha chain OS=Homo sapiens OX=9606 GN=HLA-A PE=1 SV=1
tr|A0A1W2PQD0|A0A1W2PQD0_HUMAN	153.62	38	615840	9	1	12	38430	HLA class I histocompatibility antigen A-3 alpha chain OS=Homo sapiens OX=9606 GN=HLA-A PE=1 SV=1
sp|P30455|1A36_HUMAN	153.62	35	615840	9	1	12	40934	HLA class I histocompatibility antigen A-36 alpha chain OS=Homo sapiens OX=9606 GN=HLA-A PE=1 SV=1
sp|P30443|1A01_HUMAN	153.62	35	615840	9	1	12	40846	HLA class I histocompatibility antigen A-1 alpha chain OS=Homo sapiens OX=9606 GN=HLA-A PE=1 SV=1
tr|A0A1W2PSE7|A0A1W2PSE7_HUMAN	153.62	35	615840	9	1	12	40761	HLA class I histocompatibility antigen A-3 alpha chain OS=Homo sapiens OX=9606 GN=HLA-A PE=1 SV=1
tr|A0A0G2JIF2|A0A0G2JIF2_HUMAN	153.62	35	615840	9	1	12	41373	HLA class I histocompatibility antigen A-3 alpha chain OS=Homo sapiens OX=9606 GN=HLA-A PE=1 SV=1
tr|A0A0G2JL56|A0A0G2JL56_HUMAN	153.62	33	615840	9	1	12	44257	HLA class I histocompatibility antigen A-3 alpha chain OS=Homo sapiens OX=9606 GN=HLA-A PE=1 SV=1
sp|Q9UJS0|CMC2_HUMAN	153.39	24	4426700	14	10	16	74176	Calcium-binding mitochondrial carrier protein Aralar2 OS=Homo sapiens OX=9606 GN=SLC25A13 PE=1 SV=2
tr|Q60FE5|Q60FE5_HUMAN	152.91	8	10481000	16	13	16	278224	Filamin-A OS=Homo sapiens OX=9606 GN=FLNA PE=1 SV=1
sp|P21333|FLNA_HUMAN	152.91	8	10481000	16	13	16	280737	Filamin-A OS=Homo sapiens OX=9606 GN=FLNA PE=1 SV=4
tr|A0A087WWY3|A0A087WWY3_HUMAN	152.91	8	10481000	14	13	14	245848	Filamin-A OS=Homo sapiens OX=9606 GN=FLNA PE=1 SV=1
sp|Q9BUF7|CRUM3_HUMAN	152.17	28	1903900000	7	7	25	12854	Protein crumbs homolog 3 OS=Homo sapiens OX=9606 GN=CRB3 PE=1 SV=3
sp|P62753|RS6_HUMAN	151.95	30	27816000	9	9	10	28681	40S ribosomal protein S6 OS=Homo sapiens OX=9606 GN=RPS6 PE=1 SV=1
sp|Q14764|MVP_HUMAN	151.91	26	16538000	17	17	19	99327	Major vault protein OS=Homo sapiens OX=9606 GN=MVP PE=1 SV=4
sp|P51571|SSRD_HUMAN	151.89	31	7859800	5	5	6	18999	Translocon-associated protein subunit delta OS=Homo sapiens OX=9606 GN=SSR4 PE=1 SV=1
sp|P53007|TXTP_HUMAN	151.82	25	19521000	8	8	10	34013	Tricarboxylate transport protein mitochondrial OS=Homo sapiens OX=9606 GN=SLC25A1 PE=1 SV=2
sp|P30837|AL1B1_HUMAN	151.79	21	9596800	10	8	12	57206	Aldehyde dehydrogenase X mitochondrial OS=Homo sapiens OX=9606 GN=ALDH1B1 PE=1 SV=3
sp|P22102|PUR2_HUMAN	151.62	10	7824800	7	7	7	107767	Trifunctional purine biosynthetic protein adenosine-3 OS=Homo sapiens OX=9606 GN=GART PE=1 SV=1
sp|P49755|TMEDA_HUMAN	151.42	34	14541000	7	7	8	24976	Transmembrane emp24 domain-containing protein 10 OS=Homo sapiens OX=9606 GN=TMED10 PE=1 SV=2
sp|P15880|RS2_HUMAN	151.18	37	60312000	10	10	13	31324	40S ribosomal protein S2 OS=Homo sapiens OX=9606 GN=RPS2 PE=1 SV=2
sp|P04083|ANXA1_HUMAN	151.05	34	7264200	9	9	13	38714	Annexin A1 OS=Homo sapiens OX=9606 GN=ANXA1 PE=1 SV=2
sp|P17858|PFKAL_HUMAN	150.92	16	8713100	11	7	14	85018	ATP-dependent 6-phosphofructokinase liver type OS=Homo sapiens OX=9606 GN=PFKL PE=1 SV=6
sp|P49368|TCPG_HUMAN	150.82	24	8839200	10	10	10	60534	T-complex protein 1 subunit gamma OS=Homo sapiens OX=9606 GN=CCT3 PE=1 SV=4
tr|A0A3B3ISA6|A0A3B3ISA6_HUMAN	150.7	4	14689000	3	3	3	142999	Complement C4-B (Fragment) OS=Homo sapiens OX=9606 GN=C4B PE=1 SV=1
tr|A0A140TA29|A0A140TA29_HUMAN	150.7	3	14689000	3	3	3	187665	Complement C4-B OS=Homo sapiens OX=9606 GN=C4B PE=1 SV=1
tr|A0A0G2JL54|A0A0G2JL54_HUMAN	150.7	3	14689000	3	3	3	187715	Complement C4-B OS=Homo sapiens OX=9606 GN=C4B_2 PE=1 SV=1
tr|F5GXS0|F5GXS0_HUMAN	150.7	3	14689000	3	3	3	187668	Complement C4-B OS=Homo sapiens OX=9606 GN=C4B PE=1 SV=1
tr|A0A140TA32|A0A140TA32_HUMAN	150.7	3	14689000	3	3	3	187763	Complement C4-A OS=Homo sapiens OX=9606 GN=C4A PE=1 SV=1
tr|A0A140TA49|A0A140TA49_HUMAN	150.7	3	14689000	3	3	3	187793	Complement C4-A OS=Homo sapiens OX=9606 GN=C4A PE=1 SV=1
tr|A0A140TA44|A0A140TA44_HUMAN	150.7	3	14689000	3	3	3	187659	Complement C4-A OS=Homo sapiens OX=9606 GN=C4A PE=1 SV=1
sp|P0C0L5|CO4B_HUMAN	150.7	3	14689000	3	3	3	192750	Complement C4-B OS=Homo sapiens OX=9606 GN=C4B PE=1 SV=2
sp|P0C0L4|CO4A_HUMAN	150.7	3	14689000	3	3	3	192784	Complement C4-A OS=Homo sapiens OX=9606 GN=C4A PE=1 SV=2
tr|A0A0G2JPR0|A0A0G2JPR0_HUMAN	150.7	3	14689000	3	3	3	192874	Complement C4-A OS=Homo sapiens OX=9606 GN=C4A PE=1 SV=1
sp|P50402|EMD_HUMAN	150.5	26	8437200	5	5	6	28994	Emerin OS=Homo sapiens OX=9606 GN=EMD PE=1 SV=1
sp|Q02413|DSG1_HUMAN	150.23	12	8295300	7	7	9	113748	Desmoglein-1 OS=Homo sapiens OX=9606 GN=DSG1 PE=1 SV=2
sp|P24752|THIL_HUMAN	150.2	24	9543200	8	8	8	45200	Acetyl-CoA acetyltransferase mitochondrial OS=Homo sapiens OX=9606 GN=ACAT1 PE=1 SV=1
tr|A0A0B4J2A4|A0A0B4J2A4_HUMAN	150.12	36	14820000	11	11	14	41602	3-ketoacyl-CoA thiolase mitochondrial OS=Homo sapiens OX=9606 GN=ACAA2 PE=1 SV=1
sp|P42765|THIM_HUMAN	150.12	36	14820000	11	11	14	41924	3-ketoacyl-CoA thiolase mitochondrial OS=Homo sapiens OX=9606 GN=ACAA2 PE=1 SV=2
sp|P01701|LV151_HUMAN	149.36	31	65509000	11	7	20	12249	Immunoglobulin lambda variable 1-51 OS=Homo sapiens OX=9606 GN=IGLV1-51 PE=1 SV=2
sp|Q15907|RB11B_HUMAN	148.95	43	27687000	9	9	10	24488	Ras-related protein Rab-11B OS=Homo sapiens OX=9606 GN=RAB11B PE=1 SV=4
tr|H3BMH2|H3BMH2_HUMAN	148.95	60	27687000	9	9	10	17668	Ras-related protein Rab-11A (Fragment) OS=Homo sapiens OX=9606 GN=RAB11A PE=4 SV=1
tr|H3BSC1|H3BSC1_HUMAN	148.95	47	27687000	9	9	10	22486	Ras-related protein Rab-11A OS=Homo sapiens OX=9606 GN=RAB11A PE=1 SV=1
sp|P62491|RB11A_HUMAN	148.95	43	27687000	9	9	10	24394	Ras-related protein Rab-11A OS=Homo sapiens OX=9606 GN=RAB11A PE=1 SV=3
sp|Q9H9B4|SFXN1_HUMAN	147.82	43	48953000	15	14	17	35619	Sideroflexin-1 OS=Homo sapiens OX=9606 GN=SFXN1 PE=1 SV=4
sp|P26373|RL13_HUMAN	147.31	44	29546000	12	12	14	24261	60S ribosomal protein L13 OS=Homo sapiens OX=9606 GN=RPL13 PE=1 SV=4
sp|P46778|RL21_HUMAN	146.82	36	29983000	8	8	14	18565	60S ribosomal protein L21 OS=Homo sapiens OX=9606 GN=RPL21 PE=1 SV=2
tr|F8W7C6|F8W7C6_HUMAN	146.7	37	30851000	7	7	16	18565	60S ribosomal protein L10 OS=Homo sapiens OX=9606 GN=RPL10 PE=1 SV=2
tr|A0A087WV22|A0A087WV22_HUMAN	146.7	34	30851000	7	7	16	20439	60S ribosomal protein L10 OS=Homo sapiens OX=9606 GN=RPL10 PE=1 SV=1
sp|P27635|RL10_HUMAN	146.7	29	30851000	7	7	16	24604	60S ribosomal protein L10 OS=Homo sapiens OX=9606 GN=RPL10 PE=1 SV=4
tr|E7EPM6|E7EPM6_HUMAN	146.63	14	7066700	10	10	14	74282	Long-chain-fatty-acid--CoA ligase 1 OS=Homo sapiens OX=9606 GN=ACSL1 PE=1 SV=1
sp|P33121|ACSL1_HUMAN	146.63	14	7066700	10	10	14	77943	Long-chain-fatty-acid--CoA ligase 1 OS=Homo sapiens OX=9606 GN=ACSL1 PE=1 SV=1
sp|P39023|RL3_HUMAN	146.24	30	22140000	12	12	16	46109	60S ribosomal protein L3 OS=Homo sapiens OX=9606 GN=RPL3 PE=1 SV=2
sp|P55060|XPO2_HUMAN	145.21	12	10415000	9	9	11	110417	Exportin-2 OS=Homo sapiens OX=9606 GN=CSE1L PE=1 SV=3
tr|F8VPD4|F8VPD4_HUMAN	145.04	6	7455800	13	13	18	236020	CAD protein OS=Homo sapiens OX=9606 GN=CAD PE=1 SV=1
sp|P27708|PYR1_HUMAN	145.04	6	7455800	13	13	18	242981	CAD protein OS=Homo sapiens OX=9606 GN=CAD PE=1 SV=3
sp|P24539|AT5F1_HUMAN	144.97	33	37799000	8	8	10	28909	ATP synthase F(0) complex subunit B1 mitochondrial OS=Homo sapiens OX=9606 GN=ATP5PB PE=1 SV=2
sp|Q7Z794|K2C1B_HUMAN	144.91	10	934950	9	1	17	61901	Keratin type II cytoskeletal 1b OS=Homo sapiens OX=9606 GN=KRT77 PE=2 SV=3
sp|P17987|TCPA_HUMAN	144.9	21	9595200	10	10	10	60344	T-complex protein 1 subunit alpha OS=Homo sapiens OX=9606 GN=TCP1 PE=1 SV=1
tr|E7EQR6|E7EQR6_HUMAN	144.9	27	9255400	9	9	9	43886	T-complex protein 1 subunit alpha OS=Homo sapiens OX=9606 GN=TCP1 PE=1 SV=1
sp|P13667|PDIA4_HUMAN	144.84	21	16344000	14	14	15	72933	Protein disulfide-isomerase A4 OS=Homo sapiens OX=9606 GN=PDIA4 PE=1 SV=2
sp|P01040|CYTA_HUMAN	144.68	77	9906100	7	7	7	11006	Cystatin-A OS=Homo sapiens OX=9606 GN=CSTA PE=1 SV=1
sp|Q15365|PCBP1_HUMAN	143.58	26	4158200	7	4	8	37498	Poly(rC)-binding protein 1 OS=Homo sapiens OX=9606 GN=PCBP1 PE=1 SV=2
sp|Q08380|LG3BP_HUMAN	143.27	18	5414000	8	8	9	65331	Galectin-3-binding protein OS=Homo sapiens OX=9606 GN=LGALS3BP PE=1 SV=1
sp|Q9BTV4|TMM43_HUMAN	141.99	36	6624900	9	9	11	44876	Transmembrane protein 43 OS=Homo sapiens OX=9606 GN=TMEM43 PE=1 SV=1
sp|P09758|TACD2_HUMAN	140.91	22	17384000	6	6	9	35709	Tumor-associated calcium signal transducer 2 OS=Homo sapiens OX=9606 GN=TACSTD2 PE=1 SV=3
sp|P25398|RS12_HUMAN	140.83	52	19220000	6	6	10	14515	40S ribosomal protein S12 OS=Homo sapiens OX=9606 GN=RPS12 PE=1 SV=3
tr|E9PEJ4|E9PEJ4_HUMAN	140.74	13	18219000	7	7	8	57587	Acetyltransferase component of pyruvate dehydrogenase complex OS=Homo sapiens OX=9606 GN=DLAT PE=1 SV=1
sp|P10515|ODP2_HUMAN	140.74	11	18219000	7	7	8	68997	Dihydrolipoyllysine-residue acetyltransferase component of pyruvate dehydrogenase complex mitochondrial OS=Homo sapiens OX=9606 GN=DLAT PE=1 SV=3
tr|H0YDD4|H0YDD4_HUMAN	140.74	14	18219000	7	7	8	51201	Acetyltransferase component of pyruvate dehydrogenase complex (Fragment) OS=Homo sapiens OX=9606 GN=DLAT PE=1 SV=1
sp|Q14152|EIF3A_HUMAN	140.48	8	6502500	10	10	10	166569	Eukaryotic translation initiation factor 3 subunit A OS=Homo sapiens OX=9606 GN=EIF3A PE=1 SV=1
sp|P62826|RAN_HUMAN	139.73	28	10228000	6	6	6	24423	GTP-binding nuclear protein Ran OS=Homo sapiens OX=9606 GN=RAN PE=1 SV=3
tr|B5MDF5|B5MDF5_HUMAN	139.73	26	10228000	6	6	6	26224	GTP-binding nuclear protein Ran OS=Homo sapiens OX=9606 GN=RAN PE=1 SV=1
tr|F5H018|F5H018_HUMAN	139.73	31	10228000	6	6	6	22436	GTP-binding nuclear protein Ran (Fragment) OS=Homo sapiens OX=9606 GN=RAN PE=1 SV=8
tr|J3KQE5|J3KQE5_HUMAN	139.73	26	10228000	6	6	6	26816	GTP-binding nuclear protein Ran (Fragment) OS=Homo sapiens OX=9606 GN=RAN PE=1 SV=1
sp|Q3ZCQ8|TIM50_HUMAN	139.31	24	10612000	6	6	12	39646	Mitochondrial import inner membrane translocase subunit TIM50 OS=Homo sapiens OX=9606 GN=TIMM50 PE=1 SV=2
sp|P62906|RL10A_HUMAN	139.05	29	34224000	7	7	11	24831	60S ribosomal protein L10a OS=Homo sapiens OX=9606 GN=RPL10A PE=1 SV=2
sp|Q12797|ASPH_HUMAN	139	8	3542900	5	5	5	85863	Aspartyl/asparaginyl beta-hydroxylase OS=Homo sapiens OX=9606 GN=ASPH PE=1 SV=3
sp|P14625|ENPL_HUMAN	138.79	15	13755000	10	9	14	92469	Endoplasmin OS=Homo sapiens OX=9606 GN=HSP90B1 PE=1 SV=1
sp|Q9BWM7|SFXN3_HUMAN	138.47	29	6867100	8	7	9	35503	Sideroflexin-3 OS=Homo sapiens OX=9606 GN=SFXN3 PE=1 SV=3
tr|A0A0A0MS41|A0A0A0MS41_HUMAN	138.47	29	6867100	8	7	9	35503	Sideroflexin OS=Homo sapiens OX=9606 GN=SFXN3 PE=1 SV=1
tr|A0A1P0AYU5|A0A1P0AYU5_HUMAN	138.47	29	6867100	8	7	9	35979	Sideroflexin OS=Homo sapiens OX=9606 GN=SFXN3 PE=1 SV=1
sp|Q92572|AP3S1_HUMAN	138.46	26	7674900	5	5	5	21732	AP-3 complex subunit sigma-1 OS=Homo sapiens OX=9606 GN=AP3S1 PE=1 SV=1
sp|P60866|RS20_HUMAN	138.23	32	21645000	6	6	8	13373	40S ribosomal protein S20 OS=Homo sapiens OX=9606 GN=RPS20 PE=1 SV=1
sp|P53621|COPA_HUMAN	137.86	10	9215000	11	11	12	138345	Coatomer subunit alpha OS=Homo sapiens OX=9606 GN=COPA PE=1 SV=2
tr|G5E972|G5E972_HUMAN	136.91	22	4488000	6	6	7	46307	Lamina-associated polypeptide 2 isoforms beta/gamma OS=Homo sapiens OX=9606 GN=TMPO PE=1 SV=1
sp|P42167|LAP2B_HUMAN	136.91	20	4488000	6	6	7	50670	Lamina-associated polypeptide 2 isoforms beta/gamma OS=Homo sapiens OX=9606 GN=TMPO PE=1 SV=2
tr|A0A0A6YYL6|A0A0A6YYL6_HUMAN	136.63	26	10921000	6	6	6	26373	Protein RPL17-C18orf32 OS=Homo sapiens OX=9606 GN=RPL17-C18orf32 PE=3 SV=1
tr|A0A087WXM6|A0A087WXM6_HUMAN	136.63	35	10921000	6	6	6	19586	60S ribosomal protein L17 (Fragment) OS=Homo sapiens OX=9606 GN=RPL17 PE=3 SV=1
tr|J3QQT2|J3QQT2_HUMAN	136.63	35	10921000	6	6	6	19786	60S ribosomal protein L17 (Fragment) OS=Homo sapiens OX=9606 GN=RPL17 PE=3 SV=1
tr|J3KRX5|J3KRX5_HUMAN	136.63	34	10921000	6	6	6	20170	60S ribosomal protein L17 (Fragment) OS=Homo sapiens OX=9606 GN=RPL17 PE=3 SV=1
sp|P18621|RL17_HUMAN	136.63	32	10921000	6	6	6	21397	60S ribosomal protein L17 OS=Homo sapiens OX=9606 GN=RPL17 PE=1 SV=3
tr|J3KRB3|J3KRB3_HUMAN	136.63	35	10921000	5	5	5	14894	60S ribosomal protein L17 (Fragment) OS=Homo sapiens OX=9606 GN=RPL17 PE=3 SV=3
tr|A0A087WWH0|A0A087WWH0_HUMAN	136.63	34	10921000	5	5	5	15214	60S ribosomal protein L17 (Fragment) OS=Homo sapiens OX=9606 GN=RPL17 PE=3 SV=6
tr|J3QS96|J3QS96_HUMAN	136.63	33	10921000	5	5	5	15959	60S ribosomal protein L17 (Fragment) OS=Homo sapiens OX=9606 GN=RPL17 PE=3 SV=1
sp|Q9BUH6|PAXX_HUMAN	135.75	33	14486000	6	6	7	21640	Protein PAXX OS=Homo sapiens OX=9606 GN=PAXX PE=1 SV=2
sp|P62987|RL40_HUMAN	135.74	42	45722000	6	5	11	14728	Ubiquitin-60S ribosomal protein L40 OS=Homo sapiens OX=9606 GN=UBA52 PE=1 SV=2
tr|J3QTR3|J3QTR3_HUMAN	135.74	44	45722000	5	5	10	12237	Ubiquitin-40S ribosomal protein S27a (Fragment) OS=Homo sapiens OX=9606 GN=RPS27A PE=1 SV=1
sp|P62979|RS27A_HUMAN	135.74	30	45722000	5	5	10	17965	Ubiquitin-40S ribosomal protein S27a OS=Homo sapiens OX=9606 GN=RPS27A PE=1 SV=2
tr|J3QS39|J3QS39_HUMAN	135.74	51	45722000	5	5	10	10469	Polyubiquitin-B (Fragment) OS=Homo sapiens OX=9606 GN=UBB PE=1 SV=1
tr|F5H6Q2|F5H6Q2_HUMAN	135.74	39	45722000	5	5	10	13732	Polyubiquitin-C (Fragment) OS=Homo sapiens OX=9606 GN=UBC PE=1 SV=8
tr|F5GYU3|F5GYU3_HUMAN	135.74	35	45722000	5	5	10	15032	Polyubiquitin-C (Fragment) OS=Homo sapiens OX=9606 GN=UBC PE=1 SV=1
tr|F5H2Z3|F5H2Z3_HUMAN	135.74	35	45722000	5	5	10	15310	Polyubiquitin-C (Fragment) OS=Homo sapiens OX=9606 GN=UBC PE=1 SV=1
tr|F5H265|F5H265_HUMAN	135.74	32	45722000	5	5	10	16841	Polyubiquitin-C (Fragment) OS=Homo sapiens OX=9606 GN=UBC PE=1 SV=1
tr|B4DV12|B4DV12_HUMAN	135.74	31	45722000	5	5	10	17215	Polyubiquitin-B OS=Homo sapiens OX=9606 GN=UBB PE=1 SV=1
tr|F5H747|F5H747_HUMAN	135.74	29	45722000	5	5	10	18073	Polyubiquitin-C (Fragment) OS=Homo sapiens OX=9606 GN=UBC PE=1 SV=8
tr|F5GXK7|F5GXK7_HUMAN	135.74	28	45722000	5	5	10	19016	Polyubiquitin-C (Fragment) OS=Homo sapiens OX=9606 GN=UBC PE=1 SV=2
tr|J3QKN0|J3QKN0_HUMAN	135.74	23	45722000	5	5	10	23163	Polyubiquitin-B (Fragment) OS=Homo sapiens OX=9606 GN=UBB PE=1 SV=1
sp|P0CG47|UBB_HUMAN	135.74	21	45722000	5	5	10	25762	Polyubiquitin-B OS=Homo sapiens OX=9606 GN=UBB PE=1 SV=1
tr|Q5PY61|Q5PY61_HUMAN	135.74	21	45722000	5	5	10	25758	Polyubiquitin-C OS=Homo sapiens OX=9606 GN=UBC PE=1 SV=1
sp|P0CG48|UBC_HUMAN	135.74	7	45722000	5	5	10	77039	Polyubiquitin-C OS=Homo sapiens OX=9606 GN=UBC PE=1 SV=3
tr|B1AHF3|B1AHF3_HUMAN	135.01	35	5841200	3	3	4	16696	NADH-cytochrome b5 reductase 3 (Fragment) OS=Homo sapiens OX=9606 GN=CYB5R3 PE=1 SV=1
sp|P00387|NB5R3_HUMAN	135.01	17	5841200	3	3	4	34235	NADH-cytochrome b5 reductase 3 OS=Homo sapiens OX=9606 GN=CYB5R3 PE=1 SV=3
sp|P61106|RAB14_HUMAN	134.91	47	6642000	8	7	10	23897	Ras-related protein Rab-14 OS=Homo sapiens OX=9606 GN=RAB14 PE=1 SV=4
tr|E9PDF6|E9PDF6_HUMAN	134.86	11	7189300	10	10	11	128481	Unconventional myosin-Ib OS=Homo sapiens OX=9606 GN=MYO1B PE=1 SV=1
sp|O43795|MYO1B_HUMAN	134.86	10	7189300	10	10	11	131985	Unconventional myosin-Ib OS=Homo sapiens OX=9606 GN=MYO1B PE=1 SV=3
tr|A0A2R8Y811|A0A2R8Y811_HUMAN	134.39	42	21264000	8	8	8	16160	40S ribosomal protein S14 (Fragment) OS=Homo sapiens OX=9606 GN=RPS14 PE=1 SV=1
sp|P62263|RS14_HUMAN	134.39	42	21264000	8	8	8	16273	40S ribosomal protein S14 OS=Homo sapiens OX=9606 GN=RPS14 PE=1 SV=3
sp|P31151|S10A7_HUMAN	133.66	24	25219000	4	4	10	11471	Protein S100-A7 OS=Homo sapiens OX=9606 GN=S100A7 PE=1 SV=4
sp|P27169|PON1_HUMAN	133.59	19	21603000	5	5	6	39731	Serum paraoxonase/arylesterase 1 OS=Homo sapiens OX=9606 GN=PON1 PE=1 SV=3
sp|P28799|GRN_HUMAN	133.48	8	31282000	7	7	11	63545	Progranulin OS=Homo sapiens OX=9606 GN=GRN PE=1 SV=2
tr|H3BRU6|H3BRU6_HUMAN	133.3	27	6486900	6	3	7	31719	Poly(rC)-binding protein 2 (Fragment) OS=Homo sapiens OX=9606 GN=PCBP2 PE=1 SV=1
tr|F8VZX2|F8VZX2_HUMAN	133.3	26	6486900	6	3	7	33800	Poly(rC)-binding protein 2 OS=Homo sapiens OX=9606 GN=PCBP2 PE=1 SV=1
sp|Q15366|PCBP2_HUMAN	133.3	22	6486900	6	3	7	38580	Poly(rC)-binding protein 2 OS=Homo sapiens OX=9606 GN=PCBP2 PE=1 SV=1
tr|F8VXH9|F8VXH9_HUMAN	133.3	46	6486900	5	3	6	16997	Poly(rC)-binding protein 2 (Fragment) OS=Homo sapiens OX=9606 GN=PCBP2 PE=1 SV=1
tr|F8W0G4|F8W0G4_HUMAN	133.3	42	6260300	5	2	6	16637	Poly(rC)-binding protein 2 (Fragment) OS=Homo sapiens OX=9606 GN=PCBP2 PE=1 SV=1
sp|P62805|H4_HUMAN	132.73	55	35454000	7	7	12	11367	Histone H4 OS=Homo sapiens OX=9606 GN=HIST1H4A PE=1 SV=2
tr|I3L3P7|I3L3P7_HUMAN	132.72	57	15071000	6	6	7	11478	40S ribosomal protein S15a OS=Homo sapiens OX=9606 GN=RPS15A PE=1 SV=1
sp|P62244|RS15A_HUMAN	132.72	44	15071000	6	6	7	14840	40S ribosomal protein S15a OS=Homo sapiens OX=9606 GN=RPS15A PE=1 SV=2
tr|A0A286YF22|A0A286YF22_HUMAN	132.37	18	7777400	7	6	8	55939	D-3-phosphoglycerate dehydrogenase OS=Homo sapiens OX=9606 GN=PHGDH PE=1 SV=1
tr|A0A2C9F2M7|A0A2C9F2M7_HUMAN	132.37	18	7777400	7	6	8	56112	D-3-phosphoglycerate dehydrogenase OS=Homo sapiens OX=9606 GN=PHGDH PE=1 SV=1
sp|O43175|SERA_HUMAN	132.37	18	7777400	7	6	8	56651	D-3-phosphoglycerate dehydrogenase OS=Homo sapiens OX=9606 GN=PHGDH PE=1 SV=4
sp|Q9HDC9|APMAP_HUMAN	132.3	29	8645500	8	8	11	46480	Adipocyte plasma membrane-associated protein OS=Homo sapiens OX=9606 GN=APMAP PE=1 SV=2
sp|P50454|SERPH_HUMAN	132.11	17	1046900000	5	5	6	46441	Serpin H1 OS=Homo sapiens OX=9606 GN=SERPINH1 PE=1 SV=2
sp|P62820|RAB1A_HUMAN	131.01	53	6355800	12	4	17	22678	Ras-related protein Rab-1A OS=Homo sapiens OX=9606 GN=RAB1A PE=1 SV=3
sp|P30050|RL12_HUMAN	130.86	38	21617000	5	5	6	17819	60S ribosomal protein L12 OS=Homo sapiens OX=9606 GN=RPL12 PE=1 SV=1
sp|Q7Z3Y8|K1C27_HUMAN	130.39	8	327150	6	1	21	49822	Keratin type I cytoskeletal 27 OS=Homo sapiens OX=9606 GN=KRT27 PE=1 SV=2
sp|P01024|CO3_HUMAN	129.85	5	4872700	9	4	9	187147	Complement C3 OS=Homo sapiens OX=9606 GN=C3 PE=1 SV=2
sp|P06756|ITAV_HUMAN	129.8	8	6089100	9	9	9	116038	Integrin alpha-V OS=Homo sapiens OX=9606 GN=ITGAV PE=1 SV=2
sp|P50914|RL14_HUMAN	129.38	30	27472000	6	6	8	23432	60S ribosomal protein L14 OS=Homo sapiens OX=9606 GN=RPL14 PE=1 SV=4
sp|P08574|CY1_HUMAN	129.04	21	30659000	6	6	10	35422	Cytochrome c1 heme protein mitochondrial OS=Homo sapiens OX=9606 GN=CYC1 PE=1 SV=3
tr|A0A0D9SFK2|A0A0D9SFK2_HUMAN	128.72	8	11424000	12	12	13	231105	Unconventional myosin-XVIIIa OS=Homo sapiens OX=9606 GN=MYO18A PE=1 SV=1
sp|Q92614|MY18A_HUMAN	128.72	7	11424000	12	12	13	233113	Unconventional myosin-XVIIIa OS=Homo sapiens OX=9606 GN=MYO18A PE=1 SV=3
sp|Q9P0L0|VAPA_HUMAN	128.64	12	5351300	3	2	3	27893	Vesicle-associated membrane protein-associated protein A OS=Homo sapiens OX=9606 GN=VAPA PE=1 SV=3
sp|P18031|PTN1_HUMAN	128.6	24	11814000	9	9	13	49967	Tyrosine-protein phosphatase non-receptor type 1 OS=Homo sapiens OX=9606 GN=PTPN1 PE=1 SV=1
tr|A0A0A0MSI0|A0A0A0MSI0_HUMAN	128.48	46	22307000	9	8	11	18976	Peroxiredoxin-1 (Fragment) OS=Homo sapiens OX=9606 GN=PRDX1 PE=1 SV=1
sp|Q06830|PRDX1_HUMAN	128.48	39	22307000	9	8	11	22110	Peroxiredoxin-1 OS=Homo sapiens OX=9606 GN=PRDX1 PE=1 SV=1
sp|Q5D862|FILA2_HUMAN	128.25	3	3142200	4	4	4	248072	Filaggrin-2 OS=Homo sapiens OX=9606 GN=FLG2 PE=1 SV=1
sp|Q99879|H2B1M_HUMAN	128.23	40	2612500	5	1	9	13989	Histone H2B type 1-M OS=Homo sapiens OX=9606 GN=HIST1H2BM PE=1 SV=3
sp|Q93079|H2B1H_HUMAN	128.23	40	2612500	5	1	9	13892	Histone H2B type 1-H OS=Homo sapiens OX=9606 GN=HIST1H2BH PE=1 SV=3
sp|P62807|H2B1C_HUMAN	128.23	40	2612500	5	1	9	13906	Histone H2B type 1-C/E/F/G/I OS=Homo sapiens OX=9606 GN=HIST1H2BC PE=1 SV=4
sp|Q99880|H2B1L_HUMAN	128.23	40	2612500	5	1	9	13952	Histone H2B type 1-L OS=Homo sapiens OX=9606 GN=HIST1H2BL PE=1 SV=3
sp|P58876|H2B1D_HUMAN	128.23	40	2612500	5	1	9	13936	Histone H2B type 1-D OS=Homo sapiens OX=9606 GN=HIST1H2BD PE=1 SV=2
sp|Q5QNW6|H2B2F_HUMAN	128.23	40	2612500	5	1	9	13920	Histone H2B type 2-F OS=Homo sapiens OX=9606 GN=HIST2H2BF PE=1 SV=3
sp|Q99877|H2B1N_HUMAN	128.23	40	2612500	5	1	9	13922	Histone H2B type 1-N OS=Homo sapiens OX=9606 GN=HIST1H2BN PE=1 SV=3
tr|U3KQK0|U3KQK0_HUMAN	128.23	31	2612500	5	1	9	18804	Histone H2B OS=Homo sapiens OX=9606 GN=HIST1H2BN PE=1 SV=1
sp|O60814|H2B1K_HUMAN	128.23	40	2612500	5	1	9	13890	Histone H2B type 1-K OS=Homo sapiens OX=9606 GN=HIST1H2BK PE=1 SV=3
sp|P57053|H2BFS_HUMAN	128.23	40	2612500	5	1	9	13944	Histone H2B type F-S OS=Homo sapiens OX=9606 GN=H2BFS PE=1 SV=2
sp|Q13751|LAMB3_HUMAN	128.21	10	8983800	10	10	10	129572	Laminin subunit beta-3 OS=Homo sapiens OX=9606 GN=LAMB3 PE=1 SV=1
sp|A0A075B6J9|LV218_HUMAN	128.11	30	2685200	9	1	16	12412	Immunoglobulin lambda variable 2-18 OS=Homo sapiens OX=9606 GN=IGLV2-18 PE=3 SV=2
sp|P62913|RL11_HUMAN	127.97	25	23802000	5	5	5	20252	60S ribosomal protein L11 OS=Homo sapiens OX=9606 GN=RPL11 PE=1 SV=2
sp|P52209|6PGD_HUMAN	127.65	15	11008000	6	6	7	53140	6-phosphogluconate dehydrogenase decarboxylating OS=Homo sapiens OX=9606 GN=PGD PE=1 SV=3
sp|Q9P2E9|RRBP1_HUMAN	127.07	8	5369700	9	9	13	152456	Ribosome-binding protein 1 OS=Homo sapiens OX=9606 GN=RRBP1 PE=1 SV=5
tr|A0A087WVV2|A0A087WVV2_HUMAN	127.07	9	4003300	6	6	10	102775	Ribosome-binding protein 1 OS=Homo sapiens OX=9606 GN=RRBP1 PE=1 SV=1
sp|P01706|LV211_HUMAN	126.69	28	1029100	9	1	15	12644	Immunoglobulin lambda variable 2-11 OS=Homo sapiens OX=9606 GN=IGLV2-11 PE=1 SV=2
sp|P01709|LV208_HUMAN	126.69	12	1029100	8	1	14	12382	Immunoglobulin lambda variable 2-8 OS=Homo sapiens OX=9606 GN=IGLV2-8 PE=1 SV=2
sp|P43304|GPDM_HUMAN	126.11	12	4529100	8	8	11	80853	Glycerol-3-phosphate dehydrogenase mitochondrial OS=Homo sapiens OX=9606 GN=GPD2 PE=1 SV=3
tr|F5GYN4|F5GYN4_HUMAN	126.09	22	10798000	4	4	8	28051	Ubiquitin thioesterase OTUB1 OS=Homo sapiens OX=9606 GN=OTUB1 PE=1 SV=1
sp|Q96FW1|OTUB1_HUMAN	126.09	20	10798000	4	4	8	31284	Ubiquitin thioesterase OTUB1 OS=Homo sapiens OX=9606 GN=OTUB1 PE=1 SV=2
tr|J3KR44|J3KR44_HUMAN	126.09	19	10798000	4	4	8	31440	Ubiquitin thioesterase OS=Homo sapiens OX=9606 GN=OTUB1 PE=1 SV=2
tr|F5GYJ8|F5GYJ8_HUMAN	126.09	19	10798000	4	4	8	32360	Ubiquitin thioesterase OTUB1 OS=Homo sapiens OX=9606 GN=OTUB1 PE=1 SV=1
sp|Q16778|H2B2E_HUMAN	125.91	41	668190	5	1	9	13920	Histone H2B type 2-E OS=Homo sapiens OX=9606 GN=HIST2H2BE PE=1 SV=3
sp|P33778|H2B1B_HUMAN	125.91	41	668190	5	1	9	13950	Histone H2B type 1-B OS=Homo sapiens OX=9606 GN=HIST1H2BB PE=1 SV=2
sp|P23527|H2B1O_HUMAN	125.91	41	668190	5	1	9	13906	Histone H2B type 1-O OS=Homo sapiens OX=9606 GN=HIST1H2BO PE=1 SV=3
sp|P06899|H2B1J_HUMAN	125.91	41	668190	5	1	9	13904	Histone H2B type 1-J OS=Homo sapiens OX=9606 GN=HIST1H2BJ PE=1 SV=3
sp|P0DMV8|HS71A_HUMAN	125.87	14	2074400	8	5	8	70052	Heat shock 70 kDa protein 1A OS=Homo sapiens OX=9606 GN=HSPA1A PE=1 SV=1
sp|P0DMV9|HS71B_HUMAN	125.87	14	2074400	8	5	8	70052	Heat shock 70 kDa protein 1B OS=Homo sapiens OX=9606 GN=HSPA1B PE=1 SV=1
tr|A0A0G2JIW1|A0A0G2JIW1_HUMAN	125.87	14	2074400	8	5	8	70109	Heat shock 70 kDa protein 1B OS=Homo sapiens OX=9606 GN=HSPA1B PE=1 SV=1
sp|P06312|KV401_HUMAN	125.57	18	321450000	6	6	19	13380	Immunoglobulin kappa variable 4-1 OS=Homo sapiens OX=9606 GN=IGKV4-1 PE=1 SV=1
sp|P39019|RS19_HUMAN	125.43	37	12449000	7	7	7	16060	40S ribosomal protein S19 OS=Homo sapiens OX=9606 GN=RPS19 PE=1 SV=2
sp|P30041|PRDX6_HUMAN	125.01	42	4020800	7	7	9	25035	Peroxiredoxin-6 OS=Homo sapiens OX=9606 GN=PRDX6 PE=1 SV=3
sp|P07099|HYEP_HUMAN	124.94	16	9716200	9	9	11	52949	Epoxide hydrolase 1 OS=Homo sapiens OX=9606 GN=EPHX1 PE=1 SV=1
sp|P31689|DNJA1_HUMAN	124.57	25	2981400	6	6	6	44868	DnaJ homolog subfamily A member 1 OS=Homo sapiens OX=9606 GN=DNAJA1 PE=1 SV=2
sp|O15269|SPTC1_HUMAN	124.54	11	2847700	4	4	6	52744	Serine palmitoyltransferase 1 OS=Homo sapiens OX=9606 GN=SPTLC1 PE=1 SV=1
sp|Q16555|DPYL2_HUMAN	123.07	15	7655600	7	7	7	62294	Dihydropyrimidinase-related protein 2 OS=Homo sapiens OX=9606 GN=DPYSL2 PE=1 SV=1
tr|A0A1C7CYX9|A0A1C7CYX9_HUMAN	123.07	13	7655600	7	7	7	73503	Dihydropyrimidinase-related protein 2 OS=Homo sapiens OX=9606 GN=DPYSL2 PE=1 SV=1
sp|Q15646|OASL_HUMAN	122.78	12	3294400	5	5	6	59226	2'-5'-oligoadenylate synthase-like protein OS=Homo sapiens OX=9606 GN=OASL PE=1 SV=2
sp|P68871|HBB_HUMAN	122.55	47	21788000	5	4	5	15998	Hemoglobin subunit beta OS=Homo sapiens OX=9606 GN=HBB PE=1 SV=2
sp|P46779|RL28_HUMAN	122.42	38	19840000	7	7	11	15747	60S ribosomal protein L28 OS=Homo sapiens OX=9606 GN=RPL28 PE=1 SV=3
tr|H0YKD8|H0YKD8_HUMAN	122.42	31	19840000	7	7	11	19072	60S ribosomal protein L28 OS=Homo sapiens OX=9606 GN=RPL28 PE=1 SV=1
sp|Q14974|IMB1_HUMAN	122.35	9	6381800	8	8	11	97170	Importin subunit beta-1 OS=Homo sapiens OX=9606 GN=KPNB1 PE=1 SV=2
sp|P21397|AOFA_HUMAN	122.21	24	28597000	11	11	14	59682	Amine oxidase [flavin-containing] A OS=Homo sapiens OX=9606 GN=MAOA PE=1 SV=1
sp|O95202|LETM1_HUMAN	121.93	7	2485300	5	5	6	83354	Mitochondrial proton/calcium exchanger protein OS=Homo sapiens OX=9606 GN=LETM1 PE=1 SV=1
tr|H7BXI1|H7BXI1_HUMAN	121.78	10	3363300	7	7	7	98010	Extended synaptotagmin-2 (Fragment) OS=Homo sapiens OX=9606 GN=ESYT2 PE=1 SV=1
sp|P56192|SYMC_HUMAN	121	6	7800700	5	5	5	101116	Methionine--tRNA ligase cytoplasmic OS=Homo sapiens OX=9606 GN=MARS PE=1 SV=2
tr|G3XAM7|G3XAM7_HUMAN	120.99	9	3898300	6	6	6	92722	Catenin (Cadherin-associated protein) alpha 1 102kDa isoform CRA_a OS=Homo sapiens OX=9606 GN=CTNNA1 PE=1 SV=1
sp|P35221|CTNA1_HUMAN	120.99	8	3898300	6	6	6	100071	Catenin alpha-1 OS=Homo sapiens OX=9606 GN=CTNNA1 PE=1 SV=1
tr|C9J9K3|C9J9K3_HUMAN	120.63	26	5192000	5	5	5	29405	40S ribosomal protein SA (Fragment) OS=Homo sapiens OX=9606 GN=RPSA PE=1 SV=8
sp|P08865|RSSA_HUMAN	120.63	23	5192000	5	5	5	32854	40S ribosomal protein SA OS=Homo sapiens OX=9606 GN=RPSA PE=1 SV=4
tr|A0A0C4DG17|A0A0C4DG17_HUMAN	120.63	23	5192000	5	5	5	33314	40S ribosomal protein SA OS=Homo sapiens OX=9606 GN=RPSA PE=1 SV=1
sp|Q969X5|ERGI1_HUMAN	119.34	14	8198400	4	4	6	32592	Endoplasmic reticulum-Golgi intermediate compartment protein 1 OS=Homo sapiens OX=9606 GN=ERGIC1 PE=1 SV=1
sp|P27105|STOM_HUMAN	119.22	14	4901800	3	3	3	31731	Erythrocyte band 7 integral membrane protein OS=Homo sapiens OX=9606 GN=STOM PE=1 SV=3
tr|E9PJH7|E9PJH7_HUMAN	119.05	27	11220000	7	7	7	33282	Mitochondrial glutamate carrier 1 (Fragment) OS=Homo sapiens OX=9606 GN=SLC25A22 PE=1 SV=5
sp|Q9H936|GHC1_HUMAN	119.05	27	11220000	7	7	7	34470	Mitochondrial glutamate carrier 1 OS=Homo sapiens OX=9606 GN=SLC25A22 PE=1 SV=1
sp|Q9UM00|TMCO1_HUMAN	118.98	26	4679600	4	4	4	21175	Calcium load-activated calcium channel OS=Homo sapiens OX=9606 GN=TMCO1 PE=1 SV=1
tr|J9JIE6|J9JIE6_HUMAN	118.98	20	4679600	4	4	4	27079	Calcium load-activated calcium channel OS=Homo sapiens OX=9606 GN=TMCO1 PE=1 SV=1
tr|J3QQY2|J3QQY2_HUMAN	118.98	36	2941400	3	3	3	11372	Calcium load-activated calcium channel OS=Homo sapiens OX=9606 GN=TMCO1 PE=1 SV=1
sp|P00734|THRB_HUMAN	118.92	11	15802000	7	7	9	70037	Prothrombin OS=Homo sapiens OX=9606 GN=F2 PE=1 SV=2
tr|E9PIT3|E9PIT3_HUMAN	118.92	10	14542000	6	6	8	65409	Prothrombin OS=Homo sapiens OX=9606 GN=F2 PE=1 SV=1
tr|D6RAN4|D6RAN4_HUMAN	118.62	33	8157000	6	6	8	20775	60S ribosomal protein L9 (Fragment) OS=Homo sapiens OX=9606 GN=RPL9 PE=1 SV=8
sp|P32969|RL9_HUMAN	118.62	31	8157000	6	6	8	21863	60S ribosomal protein L9 OS=Homo sapiens OX=9606 GN=RPL9 PE=1 SV=1
sp|P06493|CDK1_HUMAN	118.42	29	10237000	8	8	8	34095	Cyclin-dependent kinase 1 OS=Homo sapiens OX=9606 GN=CDK1 PE=1 SV=3
sp|P61353|RL27_HUMAN	118.17	54	23021000	9	9	10	15798	60S ribosomal protein L27 OS=Homo sapiens OX=9606 GN=RPL27 PE=1 SV=2
sp|P06702|S10A9_HUMAN	117.88	35	8426700	5	5	8	13242	Protein S100-A9 OS=Homo sapiens OX=9606 GN=S100A9 PE=1 SV=1
tr|B5MCP9|B5MCP9_HUMAN	117.78	27	2399700	4	4	4	21312	40S ribosomal protein S7 OS=Homo sapiens OX=9606 GN=RPS7 PE=1 SV=1
sp|P62081|RS7_HUMAN	117.78	26	2399700	4	4	4	22127	40S ribosomal protein S7 OS=Homo sapiens OX=9606 GN=RPS7 PE=1 SV=1
sp|Q9H0U4|RAB1B_HUMAN	117.74	49	1107200	10	2	13	22171	Ras-related protein Rab-1B OS=Homo sapiens OX=9606 GN=RAB1B PE=1 SV=1
sp|Q06210|GFPT1_HUMAN	117	5	1534300	3	3	3	78806	Glutamine--fructose-6-phosphate aminotransferase [isomerizing] 1 OS=Homo sapiens OX=9606 GN=GFPT1 PE=1 SV=3
sp|Q96FQ6|S10AG_HUMAN	116.44	50	3638800	4	4	4	11801	Protein S100-A16 OS=Homo sapiens OX=9606 GN=S100A16 PE=1 SV=1
sp|P06733|ENOA_HUMAN	116.07	16	5951500	6	6	6	47169	Alpha-enolase OS=Homo sapiens OX=9606 GN=ENO1 PE=1 SV=2
sp|Q9Y678|COPG1_HUMAN	115.54	9	3755900	6	5	7	97718	Coatomer subunit gamma-1 OS=Homo sapiens OX=9606 GN=COPG1 PE=1 SV=1
sp|Q9Y277|VDAC3_HUMAN	115.45	24	4043900	6	5	8	30659	Voltage-dependent anion-selective channel protein 3 OS=Homo sapiens OX=9606 GN=VDAC3 PE=1 SV=1
sp|P09914|IFIT1_HUMAN	114.83	17	10054000	7	7	8	55360	Interferon-induced protein with tetratricopeptide repeats 1 OS=Homo sapiens OX=9606 GN=IFIT1 PE=1 SV=2
sp|Q9P2J5|SYLC_HUMAN	114.38	5	3740300	6	6	6	134466	Leucine--tRNA ligase cytoplasmic OS=Homo sapiens OX=9606 GN=LARS PE=1 SV=2
sp|Q12931|TRAP1_HUMAN	114.12	7	2477700	4	3	4	80110	Heat shock protein 75 kDa mitochondrial OS=Homo sapiens OX=9606 GN=TRAP1 PE=1 SV=3
sp|P18085|ARF4_HUMAN	113.77	29	14738000	5	3	6	20511	ADP-ribosylation factor 4 OS=Homo sapiens OX=9606 GN=ARF4 PE=1 SV=3
sp|Q9NX63|MIC19_HUMAN	113.7	19	3964400	4	4	4	26152	MICOS complex subunit MIC19 OS=Homo sapiens OX=9606 GN=CHCHD3 PE=1 SV=1
tr|C9JRZ6|C9JRZ6_HUMAN	113.7	19	3964400	4	4	4	26753	MICOS complex subunit OS=Homo sapiens OX=9606 GN=CHCHD3 PE=1 SV=2
tr|F8WAR4|F8WAR4_HUMAN	113.7	18	3964400	4	4	4	27735	MICOS complex subunit OS=Homo sapiens OX=9606 GN=CHCHD3 PE=1 SV=1
tr|A0A087X0X3|A0A087X0X3_HUMAN	113.08	17	4941500	8	8	8	77570	Heterogeneous nuclear ribonucleoprotein M OS=Homo sapiens OX=9606 GN=HNRNPM PE=1 SV=1
sp|P52272|HNRPM_HUMAN	113.08	17	4941500	8	8	8	77516	Heterogeneous nuclear ribonucleoprotein M OS=Homo sapiens OX=9606 GN=HNRNPM PE=1 SV=3
sp|P33993|MCM7_HUMAN	112.89	12	3281000	7	7	7	81308	DNA replication licensing factor MCM7 OS=Homo sapiens OX=9606 GN=MCM7 PE=1 SV=4
sp|P53597|SUCA_HUMAN	112.63	25	21251000	7	7	7	36250	Succinate--CoA ligase [ADP/GDP-forming] subunit alpha mitochondrial OS=Homo sapiens OX=9606 GN=SUCLG1 PE=1 SV=4
sp|P20742|PZP_HUMAN	112.46	4	640460	7	2	9	163862	Pregnancy zone protein OS=Homo sapiens OX=9606 GN=PZP PE=1 SV=4
sp|Q9NQC3|RTN4_HUMAN	112.42	2	6172300	2	2	2	129931	Reticulon-4 OS=Homo sapiens OX=9606 GN=RTN4 PE=1 SV=2
tr|F8W914|F8W914_HUMAN	112.42	8	6172300	2	2	2	37145	Reticulon OS=Homo sapiens OX=9606 GN=RTN4 PE=1 SV=1
tr|C9JXB8|C9JXB8_HUMAN	112.42	28	11469000	4	4	6	14369	60S ribosomal protein L24 OS=Homo sapiens OX=9606 GN=RPL24 PE=1 SV=1
tr|C9JNW5|C9JNW5_HUMAN	112.42	23	11469000	4	4	6	17543	60S ribosomal protein L24 OS=Homo sapiens OX=9606 GN=RPL24 PE=1 SV=1
sp|P83731|RL24_HUMAN	112.42	22	11469000	4	4	6	17779	60S ribosomal protein L24 OS=Homo sapiens OX=9606 GN=RPL24 PE=1 SV=1
sp|P07384|CAN1_HUMAN	112.41	13	7156500	8	8	10	81890	Calpain-1 catalytic subunit OS=Homo sapiens OX=9606 GN=CAPN1 PE=1 SV=1
sp|P16070|CD44_HUMAN	112.31	9	14665000	7	7	9	81538	CD44 antigen OS=Homo sapiens OX=9606 GN=CD44 PE=1 SV=3
sp|P62140|PP1B_HUMAN	112.11	23	7803500	7	7	7	37187	Serine/threonine-protein phosphatase PP1-beta catalytic subunit OS=Homo sapiens OX=9606 GN=PPP1CB PE=1 SV=3
sp|Q9Y6K5|OAS3_HUMAN	112.05	5	4758800	5	5	5	121170	2'-5'-oligoadenylate synthase 3 OS=Homo sapiens OX=9606 GN=OAS3 PE=1 SV=3
sp|P01031|CO5_HUMAN	112.04	4	5645900	7	6	7	188304	Complement C5 OS=Homo sapiens OX=9606 GN=C5 PE=1 SV=4
sp|Q96AG4|LRC59_HUMAN	111.86	18	7415800	5	5	5	34930	Leucine-rich repeat-containing protein 59 OS=Homo sapiens OX=9606 GN=LRRC59 PE=1 SV=1
sp|P27144|KAD4_HUMAN	111.43	44	8236000	6	6	8	25268	Adenylate kinase 4 mitochondrial OS=Homo sapiens OX=9606 GN=AK4 PE=1 SV=1
sp|P20340|RAB6A_HUMAN	111.05	35	5435600	6	5	8	23593	Ras-related protein Rab-6A OS=Homo sapiens OX=9606 GN=RAB6A PE=1 SV=3
tr|A0A2R8YD14|A0A2R8YD14_HUMAN	110.02	16	4812900	3	3	4	19258	40S ribosomal protein S24 OS=Homo sapiens OX=9606 GN=RPS24 PE=1 SV=1
tr|E7ETK0|E7ETK0_HUMAN	110.02	21	4812900	3	3	4	15197	40S ribosomal protein S24 OS=Homo sapiens OX=9606 GN=RPS24 PE=1 SV=1
tr|A0A2R8Y849|A0A2R8Y849_HUMAN	110.02	21	4812900	3	3	4	15197	40S ribosomal protein S24 OS=Homo sapiens OX=9606 GN=RPS24 PE=1 SV=1
tr|A0A087WUS0|A0A087WUS0_HUMAN	110.02	20	4812900	3	3	4	15353	40S ribosomal protein S24 OS=Homo sapiens OX=9606 GN=RPS24 PE=1 SV=1
sp|P62847|RS24_HUMAN	110.02	20	4812900	3	3	4	15423	40S ribosomal protein S24 OS=Homo sapiens OX=9606 GN=RPS24 PE=1 SV=1
sp|Q9H3N1|TMX1_HUMAN	109.86	12	2311900	3	3	4	31791	Thioredoxin-related transmembrane protein 1 OS=Homo sapiens OX=9606 GN=TMX1 PE=1 SV=1
sp|P61026|RAB10_HUMAN	109.82	29	5402900	7	5	11	22541	Ras-related protein Rab-10 OS=Homo sapiens OX=9606 GN=RAB10 PE=1 SV=1
sp|P53618|COPB_HUMAN	109.81	10	5193700	6	6	7	107142	Coatomer subunit beta OS=Homo sapiens OX=9606 GN=COPB1 PE=1 SV=3
sp|P61313|RL15_HUMAN	108.66	26	9065300	5	5	9	24146	60S ribosomal protein L15 OS=Homo sapiens OX=9606 GN=RPL15 PE=1 SV=2
sp|P51572|BAP31_HUMAN	108.66	20	3230100	5	5	6	27992	B-cell receptor-associated protein 31 OS=Homo sapiens OX=9606 GN=BCAP31 PE=1 SV=3
sp|Q9Y3Z3|SAMH1_HUMAN	108.6	9	2627900	4	4	4	72201	Deoxynucleoside triphosphate triphosphohydrolase SAMHD1 OS=Homo sapiens OX=9606 GN=SAMHD1 PE=1 SV=2
tr|H3BUX2|H3BUX2_HUMAN	108.31	52	7583600	5	5	5	15717	Cytochrome b5 type B OS=Homo sapiens OX=9606 GN=CYB5B PE=1 SV=1
sp|O43169|CYB5B_HUMAN	108.31	50	7583600	5	5	5	16332	Cytochrome b5 type B OS=Homo sapiens OX=9606 GN=CYB5B PE=1 SV=2
tr|J3KNF8|J3KNF8_HUMAN	108.31	49	7583600	5	5	5	16695	Cytochrome b5 type B (Outer mitochondrial membrane) isoform CRA_a OS=Homo sapiens OX=9606 GN=CYB5B PE=1 SV=1
tr|A0A2R8Y6L3|A0A2R8Y6L3_HUMAN	107.46	34	3637100	5	5	5	14294	RPS10-NUDT3 readthrough (Fragment) OS=Homo sapiens OX=9606 GN=RPS10-NUDT3 PE=4 SV=1
sp|P46783|RS10_HUMAN	107.46	25	3637100	5	5	5	18898	40S ribosomal protein S10 OS=Homo sapiens OX=9606 GN=RPS10 PE=1 SV=1
tr|F6U211|F6U211_HUMAN	107.46	24	3637100	5	5	5	19868	40S ribosomal protein S10 OS=Homo sapiens OX=9606 GN=RPS10 PE=4 SV=1
tr|A0A2R8Y7H1|A0A2R8Y7H1_HUMAN	107.46	22	3637100	5	5	5	21254	40S ribosomal protein S10 OS=Homo sapiens OX=9606 GN=RPS10 PE=4 SV=1
tr|A0A2R8YFH6|A0A2R8YFH6_HUMAN	107.46	19	3637100	5	5	5	24514	40S ribosomal protein S10 OS=Homo sapiens OX=9606 GN=RPS10 PE=4 SV=1
tr|A0A1W2PQS6|A0A1W2PQS6_HUMAN	107.46	14	3637100	5	5	5	33141	RPS10-NUDT3 readthrough OS=Homo sapiens OX=9606 GN=RPS10-NUDT3 PE=4 SV=1
sp|O75746|CMC1_HUMAN	107.06	10	281350	6	2	8	74762	Calcium-binding mitochondrial carrier protein Aralar1 OS=Homo sapiens OX=9606 GN=SLC25A12 PE=1 SV=2
sp|P29728|OAS2_HUMAN	107.02	8	5820800	6	6	9	82431	2'-5'-oligoadenylate synthase 2 OS=Homo sapiens OX=9606 GN=OAS2 PE=1 SV=3
tr|A0A087X0V5|A0A087X0V5_HUMAN	107.02	8	5820800	6	6	9	83236	2'-5'-oligoadenylate synthase 2 OS=Homo sapiens OX=9606 GN=OAS2 PE=1 SV=1
sp|P62266|RS23_HUMAN	106.69	29	15827000	4	4	4	15808	40S ribosomal protein S23 OS=Homo sapiens OX=9606 GN=RPS23 PE=1 SV=3
sp|Q6NUK1|SCMC1_HUMAN	106.47	26	13489000	12	12	14	53354	Calcium-binding mitochondrial carrier protein SCaMC-1 OS=Homo sapiens OX=9606 GN=SLC25A24 PE=1 SV=2
sp|P16401|H15_HUMAN	106.23	21	2781000	7	5	18	22580	Histone H1.5 OS=Homo sapiens OX=9606 GN=HIST1H1B PE=1 SV=3
sp|P20591|MX1_HUMAN	105.7	8	2805000	4	4	4	75520	Interferon-induced GTP-binding protein Mx1 OS=Homo sapiens OX=9606 GN=MX1 PE=1 SV=4
tr|B9A067|B9A067_HUMAN	105.24	12	6736600	8	8	9	78974	MICOS complex subunit MIC60 OS=Homo sapiens OX=9606 GN=IMMT PE=1 SV=2
sp|Q16891|MIC60_HUMAN	105.24	11	6736600	8	8	9	83678	MICOS complex subunit MIC60 OS=Homo sapiens OX=9606 GN=IMMT PE=1 SV=1
sp|Q9NS69|TOM22_HUMAN	103.55	23	2551400	2	2	4	15522	Mitochondrial import receptor subunit TOM22 homolog OS=Homo sapiens OX=9606 GN=TOMM22 PE=1 SV=3
sp|O75970|MPDZ_HUMAN	103.23	4	2481900	7	6	7	221616	Multiple PDZ domain protein OS=Homo sapiens OX=9606 GN=MPDZ PE=1 SV=2
tr|F5H1U9|F5H1U9_HUMAN	103.23	4	2481900	7	6	7	223124	Multiple PDZ domain protein OS=Homo sapiens OX=9606 GN=MPDZ PE=1 SV=1
tr|G3V325|G3V325_HUMAN	103.01	5	14782000	4	4	5	84110	ATP5MF-PTCD1 readthrough OS=Homo sapiens OX=9606 GN=ATP5MF-PTCD1 PE=4 SV=1
tr|C9JJT5|C9JJT5_HUMAN	103.01	63	14782000	4	4	5	5915	ATP5MF-PTCD1 readthrough OS=Homo sapiens OX=9606 GN=ATP5MF-PTCD1 PE=4 SV=2
sp|P56134|ATPK_HUMAN	103.01	26	9377800	2	2	3	10918	ATP synthase subunit f mitochondrial OS=Homo sapiens OX=9606 GN=ATP5MF PE=1 SV=3
tr|C9JU26|C9JU26_HUMAN	103.01	24	9377800	2	2	3	11364	ATP synthase subunit f mitochondrial OS=Homo sapiens OX=9606 GN=ATP5MF PE=1 SV=1
sp|Q9NSD9|SYFB_HUMAN	102.92	9	4797800	6	6	7	66116	Phenylalanine--tRNA ligase beta subunit OS=Homo sapiens OX=9606 GN=FARSB PE=1 SV=3
sp|P00966|ASSY_HUMAN	102.73	15	5461400	6	6	6	46530	Argininosuccinate synthase OS=Homo sapiens OX=9606 GN=ASS1 PE=1 SV=2
sp|A2NJV5|KV229_HUMAN	102.72	24	38891000	3	2	5	13085	Immunoglobulin kappa variable 2-29 OS=Homo sapiens OX=9606 GN=IGKV2-29 PE=3 SV=2
sp|P60228|EIF3E_HUMAN	102.46	19	3742600	8	8	8	52221	Eukaryotic translation initiation factor 3 subunit E OS=Homo sapiens OX=9606 GN=EIF3E PE=1 SV=1
sp|O95782|AP2A1_HUMAN	102.1	6	3406700	6	6	7	107546	AP-2 complex subunit alpha-1 OS=Homo sapiens OX=9606 GN=AP2A1 PE=1 SV=3
sp|Q15286|RAB35_HUMAN	102.07	20	477470	4	2	8	23025	Ras-related protein Rab-35 OS=Homo sapiens OX=9606 GN=RAB35 PE=1 SV=1
sp|P59998|ARPC4_HUMAN	102.03	23	5461200	4	4	4	19667	Actin-related protein 2/3 complex subunit 4 OS=Homo sapiens OX=9606 GN=ARPC4 PE=1 SV=3
tr|F8WCF6|F8WCF6_HUMAN	102.03	22	5461200	4	4	4	21059	Actin-related protein 2/3 complex subunit 4 OS=Homo sapiens OX=9606 GN=ARPC4-TTLL3 PE=3 SV=1
sp|P69905|HBA_HUMAN	101.7	17	30364000	3	3	4	15258	Hemoglobin subunit alpha OS=Homo sapiens OX=9606 GN=HBA1 PE=1 SV=2
tr|A0A2R8Y7C0|A0A2R8Y7C0_HUMAN	101.7	18	30364000	3	3	4	13962	Hemoglobin subunit alpha (Fragment) OS=Homo sapiens OX=9606 GN=HBA2 PE=1 SV=1
sp|P61019|RAB2A_HUMAN	101.7	25	3217000	4	4	5	23546	Ras-related protein Rab-2A OS=Homo sapiens OX=9606 GN=RAB2A PE=1 SV=1
tr|A0A0J9YXF2|A0A0J9YXF2_HUMAN	101.64	12	4533800	3	3	5	41527	Paraoxonase 2 isoform CRA_a OS=Homo sapiens OX=9606 GN=PON2 PE=1 SV=1
tr|J3QT77|J3QT77_HUMAN	101.64	13	4533800	3	3	5	37980	Serum paraoxonase/arylesterase 2 OS=Homo sapiens OX=9606 GN=PON2 PE=1 SV=1
tr|A0A0J9YYG4|A0A0J9YYG4_HUMAN	101.64	12	4533800	3	3	5	39381	Serum paraoxonase/arylesterase 2 OS=Homo sapiens OX=9606 GN=PON2 PE=1 SV=1
sp|Q15165|PON2_HUMAN	101.64	12	4533800	3	3	5	39381	Serum paraoxonase/arylesterase 2 OS=Homo sapiens OX=9606 GN=PON2 PE=1 SV=4
sp|Q9NUP9|LIN7C_HUMAN	101.56	51	21405000	8	8	8	21834	Protein lin-7 homolog C OS=Homo sapiens OX=9606 GN=LIN7C PE=1 SV=1
sp|P62854|RS26_HUMAN	101.33	50	13802000	5	5	6	13015	40S ribosomal protein S26 OS=Homo sapiens OX=9606 GN=RPS26 PE=1 SV=3
sp|P42677|RS27_HUMAN	101.16	42	9627900	4	4	6	9461	40S ribosomal protein S27 OS=Homo sapiens OX=9606 GN=RPS27 PE=1 SV=3
sp|Q01650|LAT1_HUMAN	100.6	8	13320000	3	3	4	55010	Large neutral amino acids transporter small subunit 1 OS=Homo sapiens OX=9606 GN=SLC7A5 PE=1 SV=2
tr|D6R9I9|D6R9I9_HUMAN	100.41	10	2894700	4	4	4	47037	ATP-binding cassette sub-family E member 1 OS=Homo sapiens OX=9606 GN=ABCE1 PE=1 SV=1
sp|P61221|ABCE1_HUMAN	100.41	7	2894700	4	4	4	67314	ATP-binding cassette sub-family E member 1 OS=Homo sapiens OX=9606 GN=ABCE1 PE=1 SV=1
sp|P46781|RS9_HUMAN	100.37	44	23244000	10	10	11	22591	40S ribosomal protein S9 OS=Homo sapiens OX=9606 GN=RPS9 PE=1 SV=3
tr|A0A024R4M0|A0A024R4M0_HUMAN	100.37	44	23244000	10	10	11	22591	40S ribosomal protein S9 OS=Homo sapiens OX=9606 GN=RPS9 PE=1 SV=1
tr|H9KV75|H9KV75_HUMAN	100.11	8	1698300	5	2	5	94826	Alpha-actinin-1 OS=Homo sapiens OX=9606 GN=ACTN1 PE=1 SV=1
sp|P12814|ACTN1_HUMAN	100.11	7	1698300	5	2	5	103058	Alpha-actinin-1 OS=Homo sapiens OX=9606 GN=ACTN1 PE=1 SV=2
sp|Q08J23|NSUN2_HUMAN	99.88	6	1283300	4	4	4	86471	tRNA (cytosine(34)-C(5))-methyltransferase OS=Homo sapiens OX=9606 GN=NSUN2 PE=1 SV=2
sp|O00303|EIF3F_HUMAN	99.83	11	2665500	3	3	4	37564	Eukaryotic translation initiation factor 3 subunit F OS=Homo sapiens OX=9606 GN=EIF3F PE=1 SV=1
sp|Q9Y285|SYFA_HUMAN	99.64	16	3150800	6	6	6	57564	Phenylalanine--tRNA ligase alpha subunit OS=Homo sapiens OX=9606 GN=FARSA PE=1 SV=3
sp|Q8IY21|DDX60_HUMAN	99.44	4	4705300	5	5	6	197852	Probable ATP-dependent RNA helicase DDX60 OS=Homo sapiens OX=9606 GN=DDX60 PE=1 SV=3
tr|J3QRD1|J3QRD1_HUMAN	99.37	12	2376700	5	4	5	44648	Fatty aldehyde dehydrogenase OS=Homo sapiens OX=9606 GN=ALDH3A2 PE=1 SV=1
sp|P51648|AL3A2_HUMAN	99.37	9	2376700	5	4	5	54848	Fatty aldehyde dehydrogenase OS=Homo sapiens OX=9606 GN=ALDH3A2 PE=1 SV=1
sp|P01619|KV320_HUMAN	98.87	28	7635800	3	1	4	12557	Immunoglobulin kappa variable 3-20 OS=Homo sapiens OX=9606 GN=IGKV3-20 PE=1 SV=2
sp|P05109|S10A8_HUMAN	98.71	45	10827000	4	4	5	10835	Protein S100-A8 OS=Homo sapiens OX=9606 GN=S100A8 PE=1 SV=1
sp|Q03135|CAV1_HUMAN	98.69	22	6050000	4	4	4	20472	Caveolin-1 OS=Homo sapiens OX=9606 GN=CAV1 PE=1 SV=4
tr|E9PKZ0|E9PKZ0_HUMAN	98.69	30	19427000	7	7	7	22389	60S ribosomal protein L8 (Fragment) OS=Homo sapiens OX=9606 GN=RPL8 PE=1 SV=1
sp|P62917|RL8_HUMAN	98.69	24	19427000	7	7	7	28025	60S ribosomal protein L8 OS=Homo sapiens OX=9606 GN=RPL8 PE=1 SV=2
sp|P55884|EIF3B_HUMAN	98.54	6	2735500	4	4	4	92482	Eukaryotic translation initiation factor 3 subunit B OS=Homo sapiens OX=9606 GN=EIF3B PE=1 SV=3
sp|P12004|PCNA_HUMAN	98.45	18	6286500	4	4	5	28769	Proliferating cell nuclear antigen OS=Homo sapiens OX=9606 GN=PCNA PE=1 SV=1
sp|A0A0C4DH25|KVD20_HUMAN	98.45	28	11118000	3	1	7	12515	Immunoglobulin kappa variable 3D-20 OS=Homo sapiens OX=9606 GN=IGKV3D-20 PE=3 SV=1
sp|P50570|DYN2_HUMAN	98.43	8	2827200	5	5	5	98064	Dynamin-2 OS=Homo sapiens OX=9606 GN=DNM2 PE=1 SV=2
sp|Q86UE4|LYRIC_HUMAN	98.23	6	3756800	3	3	3	63837	Protein LYRIC OS=Homo sapiens OX=9606 GN=MTDH PE=1 SV=2
sp|Q9NZN4|EHD2_HUMAN	98.2	12	4066100	7	5	9	61162	EH domain-containing protein 2 OS=Homo sapiens OX=9606 GN=EHD2 PE=1 SV=2
sp|Q92616|GCN1_HUMAN	98.1	2	2574000	5	5	8	292756	eIF-2-alpha kinase activator GCN1 OS=Homo sapiens OX=9606 GN=GCN1 PE=1 SV=6
sp|Q96C19|EFHD2_HUMAN	97.87	15	4601000	4	4	5	26697	EF-hand domain-containing protein D2 OS=Homo sapiens OX=9606 GN=EFHD2 PE=1 SV=1
sp|P81605|DCD_HUMAN	97.33	23	10351000	3	3	4	11284	Dermcidin OS=Homo sapiens OX=9606 GN=DCD PE=1 SV=2
sp|Q13155|AIMP2_HUMAN	97.1	25	3595800	5	5	6	35349	Aminoacyl tRNA synthase complex-interacting multifunctional protein 2 OS=Homo sapiens OX=9606 GN=AIMP2 PE=1 SV=2
sp|Q5K651|SAMD9_HUMAN	97.06	3	1396400	4	4	4	184280	Sterile alpha motif domain-containing protein 9 OS=Homo sapiens OX=9606 GN=SAMD9 PE=1 SV=1
tr|C9JKF1|C9JKF1_HUMAN	97.06	4	1396400	4	4	4	148820	Sterile alpha motif domain-containing protein 9 (Fragment) OS=Homo sapiens OX=9606 GN=SAMD9 PE=1 SV=1
sp|Q2VIR3|IF2GL_HUMAN	96.96	8	1384100	3	3	3	51229	Eukaryotic translation initiation factor 2 subunit 3B OS=Homo sapiens OX=9606 GN=EIF2S3B PE=2 SV=2
sp|P41091|IF2G_HUMAN	96.96	8	1384100	3	3	3	51110	Eukaryotic translation initiation factor 2 subunit 3 OS=Homo sapiens OX=9606 GN=EIF2S3 PE=1 SV=3
sp|Q9UHN1|DPOG2_HUMAN	96.93	6	5976600	3	3	3	54911	DNA polymerase subunit gamma-2 mitochondrial OS=Homo sapiens OX=9606 GN=POLG2 PE=1 SV=1
tr|A0A3B3IRI2|A0A3B3IRI2_HUMAN	96.89	11	4089700	5	5	9	63723	CTP synthase OS=Homo sapiens OX=9606 GN=CTPS1 PE=1 SV=1
sp|P17812|PYRG1_HUMAN	96.89	10	4089700	5	5	9	66690	CTP synthase 1 OS=Homo sapiens OX=9606 GN=CTPS1 PE=1 SV=2
sp|O75915|PRAF3_HUMAN	96.1	19	7055100	4	4	5	21615	PRA1 family protein 3 OS=Homo sapiens OX=9606 GN=ARL6IP5 PE=1 SV=1
sp|P02545|LMNA_HUMAN	96.07	11	15208000	6	6	7	74140	Prelamin-A/C OS=Homo sapiens OX=9606 GN=LMNA PE=1 SV=1
sp|O75489|NDUS3_HUMAN	96.05	16	4773300	3	3	4	30242	NADH dehydrogenase [ubiquinone] iron-sulfur protein 3 mitochondrial OS=Homo sapiens OX=9606 GN=NDUFS3 PE=1 SV=1
sp|P61020|RAB5B_HUMAN	95.45	18	298600	3	2	3	23707	Ras-related protein Rab-5B OS=Homo sapiens OX=9606 GN=RAB5B PE=1 SV=1
sp|P04899|GNAI2_HUMAN	95.22	11	1551900	3	2	3	40451	Guanine nucleotide-binding protein G(i) subunit alpha-2 OS=Homo sapiens OX=9606 GN=GNAI2 PE=1 SV=3
tr|A0A2R8Y804|A0A2R8Y804_HUMAN	95.05	10	2914800	7	4	7	77207	Catenin beta-1 OS=Homo sapiens OX=9606 GN=CTNNB1 PE=1 SV=1
tr|A0A2R8Y543|A0A2R8Y543_HUMAN	95.05	10	2914800	7	4	7	78405	Catenin beta-1 OS=Homo sapiens OX=9606 GN=CTNNB1 PE=1 SV=1
tr|A0A2R8Y5C3|A0A2R8Y5C3_HUMAN	95.05	9	2914800	7	4	7	80699	Catenin beta-1 OS=Homo sapiens OX=9606 GN=CTNNB1 PE=1 SV=1
tr|A0A2R8Y750|A0A2R8Y750_HUMAN	95.05	9	2914800	7	4	7	81430	Catenin beta-1 OS=Homo sapiens OX=9606 GN=CTNNB1 PE=1 SV=1
tr|B4DGU4|B4DGU4_HUMAN	95.05	9	2914800	7	4	7	84766	Catenin beta-1 OS=Homo sapiens OX=9606 GN=CTNNB1 PE=1 SV=1
tr|A0A2R8YCH5|A0A2R8YCH5_HUMAN	95.05	9	2914800	7	4	7	85268	Catenin beta-1 (Fragment) OS=Homo sapiens OX=9606 GN=CTNNB1 PE=1 SV=1
tr|A0A2R8Y7Z0|A0A2R8Y7Z0_HUMAN	95.05	9	2914800	7	4	7	85368	Catenin beta-1 OS=Homo sapiens OX=9606 GN=CTNNB1 PE=1 SV=1
sp|P35222|CTNB1_HUMAN	95.05	9	2914800	7	4	7	85497	Catenin beta-1 OS=Homo sapiens OX=9606 GN=CTNNB1 PE=1 SV=1
tr|A0A2R8Y5A3|A0A2R8Y5A3_HUMAN	95.05	9	2914800	7	4	7	85681	Catenin beta-1 OS=Homo sapiens OX=9606 GN=CTNNB1 PE=1 SV=1
tr|A0A2R8Y5Z1|A0A2R8Y5Z1_HUMAN	95.05	9	2914800	7	4	7	82426	Catenin beta-1 OS=Homo sapiens OX=9606 GN=CTNNB1 PE=1 SV=1
sp|Q16787|LAMA3_HUMAN	94.66	3	5830600	8	8	8	366650	Laminin subunit alpha-3 OS=Homo sapiens OX=9606 GN=LAMA3 PE=1 SV=2
tr|F5GX14|F5GX14_HUMAN	94.53	17	1396700	3	3	4	23901	Malectin OS=Homo sapiens OX=9606 GN=MLEC PE=1 SV=1
sp|Q14165|MLEC_HUMAN	94.53	13	1396700	3	3	4	32234	Malectin OS=Homo sapiens OX=9606 GN=MLEC PE=1 SV=1
tr|F5H1S8|F5H1S8_HUMAN	94.53	17	1199200	2	2	3	16729	Malectin (Fragment) OS=Homo sapiens OX=9606 GN=MLEC PE=1 SV=1
sp|P62851|RS25_HUMAN	94.26	30	17879000	4	4	5	13742	40S ribosomal protein S25 OS=Homo sapiens OX=9606 GN=RPS25 PE=1 SV=1
tr|F8VXL2|F8VXL2_HUMAN	94.09	28	1567900	3	3	3	5426	Dynein light chain OS=Homo sapiens OX=9606 GN=DYNLL1 PE=1 SV=1
tr|F8VRV5|F8VRV5_HUMAN	94.09	19	1567900	3	3	3	7209	Dynein light chain OS=Homo sapiens OX=9606 GN=DYNLL1 PE=1 SV=1
sp|P63167|DYL1_HUMAN	94.09	15	1567900	3	3	3	10366	Dynein light chain 1 cytoplasmic OS=Homo sapiens OX=9606 GN=DYNLL1 PE=1 SV=1
sp|Q9UL46|PSME2_HUMAN	93.87	17	2492200	4	3	4	27402	Proteasome activator complex subunit 2 OS=Homo sapiens OX=9606 GN=PSME2 PE=1 SV=4
tr|A0A087X1Z3|A0A087X1Z3_HUMAN	93.87	16	2492200	4	3	4	29127	Proteasome activator complex subunit 2 OS=Homo sapiens OX=9606 GN=PSME2 PE=1 SV=1
tr|H0YM70|H0YM70_HUMAN	93.87	19	4830900	4	4	4	26011	Proteasome activator complex subunit 2 OS=Homo sapiens OX=9606 GN=PSME2 PE=1 SV=1
sp|P60468|SC61B_HUMAN	93.8	26	7429400	2	2	2	9974	Protein transport protein Sec61 subunit beta OS=Homo sapiens OX=9606 GN=SEC61B PE=1 SV=2
tr|A0A0U1RQQ4|A0A0U1RQQ4_HUMAN	93.64	12	1777900	2	2	2	24403	Endothelial protein C receptor (Fragment) OS=Homo sapiens OX=9606 GN=PROCR PE=1 SV=1
sp|Q9UNN8|EPCR_HUMAN	93.64	11	1777900	2	2	2	26671	Endothelial protein C receptor OS=Homo sapiens OX=9606 GN=PROCR PE=1 SV=1
tr|F5GXX5|F5GXX5_HUMAN	93.53	38	5889500	3	3	5	9554	Dolichyl-diphosphooligosaccharide--protein glycosyltransferase subunit DAD1 OS=Homo sapiens OX=9606 GN=DAD1 PE=1 SV=1
sp|P61803|DAD1_HUMAN	93.53	28	5889500	3	3	5	12497	Dolichyl-diphosphooligosaccharide--protein glycosyltransferase subunit DAD1 OS=Homo sapiens OX=9606 GN=DAD1 PE=1 SV=3
tr|A0A1W2PPX5|A0A1W2PPX5_HUMAN	93.48	12	7151400	5	5	7	49204	Lysosome membrane protein 2 OS=Homo sapiens OX=9606 GN=SCARB2 PE=1 SV=1
tr|A0A1W2PPU6|A0A1W2PPU6_HUMAN	93.48	11	7151400	5	5	7	49628	Lysosome membrane protein 2 OS=Homo sapiens OX=9606 GN=SCARB2 PE=1 SV=1
tr|A0A1W2PQR6|A0A1W2PQR6_HUMAN	93.48	11	7151400	5	5	7	51049	Lysosome membrane protein 2 OS=Homo sapiens OX=9606 GN=SCARB2 PE=1 SV=1
tr|A0A1W2PQB7|A0A1W2PQB7_HUMAN	93.48	11	7151400	5	5	7	53422	Lysosome membrane protein 2 OS=Homo sapiens OX=9606 GN=SCARB2 PE=1 SV=1
tr|A0A1W2PS43|A0A1W2PS43_HUMAN	93.48	11	7151400	5	5	7	53892	Lysosome membrane protein 2 OS=Homo sapiens OX=9606 GN=SCARB2 PE=1 SV=1
sp|Q14108|SCRB2_HUMAN	93.48	10	7151400	5	5	7	54290	Lysosome membrane protein 2 OS=Homo sapiens OX=9606 GN=SCARB2 PE=1 SV=2
tr|A0A1W2PRS1|A0A1W2PRS1_HUMAN	93.48	10	7151400	5	5	7	58167	Lysosome membrane protein 2 (Fragment) OS=Homo sapiens OX=9606 GN=SCARB2 PE=1 SV=1
sp|O95168|NDUB4_HUMAN	93.15	41	3982700	4	4	4	15209	NADH dehydrogenase [ubiquinone] 1 beta subcomplex subunit 4 OS=Homo sapiens OX=9606 GN=NDUFB4 PE=1 SV=3
sp|Q9Y6C9|MTCH2_HUMAN	93.09	27	4607400	6	6	7	33331	Mitochondrial carrier homolog 2 OS=Homo sapiens OX=9606 GN=MTCH2 PE=1 SV=1
tr|A0A2R8YDZ0|A0A2R8YDZ0_HUMAN	92.68	22	9953200	2	1	4	13878	Basigin OS=Homo sapiens OX=9606 GN=BSG PE=1 SV=1
sp|P06310|KV230_HUMAN	92.58	17	32156000	2	1	41	13185	Immunoglobulin kappa variable 2-30 OS=Homo sapiens OX=9606 GN=IGKV2-30 PE=3 SV=2
sp|A0A075B6S6|KVD30_HUMAN	92.58	17	32156000	2	1	41	13215	Immunoglobulin kappa variable 2D-30 OS=Homo sapiens OX=9606 GN=IGKV2D-30 PE=3 SV=1
tr|B1AK87|B1AK87_HUMAN	92.42	24	3559500	5	5	5	29295	F-actin-capping protein subunit beta OS=Homo sapiens OX=9606 GN=CAPZB PE=1 SV=1
tr|B1AK88|B1AK88_HUMAN	92.42	21	3559500	5	5	5	33781	F-actin-capping protein subunit beta OS=Homo sapiens OX=9606 GN=CAPZB PE=1 SV=1
tr|E9PP50|E9PP50_HUMAN	92.38	45	2523900	4	4	5	17778	Cofilin-1 (Fragment) OS=Homo sapiens OX=9606 GN=CFL1 PE=1 SV=8
sp|P23528|COF1_HUMAN	92.38	43	2523900	4	4	5	18502	Cofilin-1 OS=Homo sapiens OX=9606 GN=CFL1 PE=1 SV=3
sp|P47985|UCRI_HUMAN	92.32	19	9897600	4	4	4	29668	Cytochrome b-c1 complex subunit Rieske mitochondrial OS=Homo sapiens OX=9606 GN=UQCRFS1 PE=1 SV=2
sp|Q15125|EBP_HUMAN	91.79	17	11267000	3	3	4	26353	3-beta-hydroxysteroid-Delta(8) Delta(7)-isomerase OS=Homo sapiens OX=9606 GN=EBP PE=1 SV=3
tr|A0A2R8Y891|A0A2R8Y891_HUMAN	91.75	7	1416600	6	3	7	96908	ATP-dependent 6-phosphofructokinase OS=Homo sapiens OX=9606 GN=PFKM PE=1 SV=1
sp|P08237|PFKAM_HUMAN	91.75	8	1416600	6	3	7	85183	ATP-dependent 6-phosphofructokinase muscle type OS=Homo sapiens OX=9606 GN=PFKM PE=1 SV=2
tr|F8VZI0|F8VZI0_HUMAN	91.75	7	1416600	5	3	6	79643	ATP-dependent 6-phosphofructokinase muscle type OS=Homo sapiens OX=9606 GN=PFKM PE=1 SV=9
tr|A0A140T936|A0A140T936_HUMAN	91.39	4	1833200	4	4	5	131949	Valine--tRNA ligase (Fragment) OS=Homo sapiens OX=9606 GN=VARS PE=1 SV=1
sp|P26640|SYVC_HUMAN	91.39	3	1833200	4	4	5	140476	Valine--tRNA ligase OS=Homo sapiens OX=9606 GN=VARS PE=1 SV=4
tr|A6XMV8|A6XMV8_HUMAN	91.04	15	9303600	3	2	12	26670	Protease serine 2 preproprotein OS=Homo sapiens OX=9606 GN=PRSS2 PE=1 SV=1
sp|P07478|TRY2_HUMAN	91.04	15	9303600	3	2	12	26488	Trypsin-2 OS=Homo sapiens OX=9606 GN=PRSS2 PE=1 SV=1
tr|A0A0J9YYC8|A0A0J9YYC8_HUMAN	91.04	15	9303600	3	2	12	26428	Trypsin-2 OS=Homo sapiens OX=9606 GN=PRSS2 PE=1 SV=1
tr|A6XMV9|A6XMV9_HUMAN	91.04	15	9303600	3	2	12	28004	Protease serine 2 preproprotein OS=Homo sapiens OX=9606 GN=PRSS2 PE=1 SV=1
sp|Q15836|VAMP3_HUMAN	90.94	46	4156600	5	5	6	11309	Vesicle-associated membrane protein 3 OS=Homo sapiens OX=9606 GN=VAMP3 PE=1 SV=3
tr|J3QRU4|J3QRU4_HUMAN	90.94	29	2895600	4	4	5	12251	Vesicle-associated membrane protein 2 OS=Homo sapiens OX=9606 GN=VAMP2 PE=4 SV=2
sp|P63027|VAMP2_HUMAN	90.94	28	2895600	4	4	5	12663	Vesicle-associated membrane protein 2 OS=Homo sapiens OX=9606 GN=VAMP2 PE=1 SV=3
tr|F8WCA0|F8WCA0_HUMAN	90.94	28	2895600	4	4	5	12934	Vesicle-associated membrane protein 2 OS=Homo sapiens OX=9606 GN=VAMP2 PE=4 SV=1
tr|L7N2F9|L7N2F9_HUMAN	90.94	27	2895600	4	4	5	13068	Uncharacterized protein (Fragment) OS=Homo sapiens OX=9606 PE=4 SV=1
tr|K7ENK9|K7ENK9_HUMAN	90.94	49	2895600	4	4	5	7775	Vesicle-associated membrane protein 2 OS=Homo sapiens OX=9606 GN=VAMP2 PE=4 SV=1
tr|K7EKX0|K7EKX0_HUMAN	90.94	46	2895600	4	4	5	8310	Vesicle-associated membrane protein 3 OS=Homo sapiens OX=9606 GN=VAMP3 PE=4 SV=1
sp|O43707|ACTN4_HUMAN	90.9	7	21709000	6	4	6	104854	Alpha-actinin-4 OS=Homo sapiens OX=9606 GN=ACTN4 PE=1 SV=2
tr|A0A087WXP3|A0A087WXP3_HUMAN	90.81	4	2573800	3	2	3	75849	Integrin beta OS=Homo sapiens OX=9606 GN=ITGB6 PE=1 SV=1
tr|E9PEE8|E9PEE8_HUMAN	90.81	4	2573800	3	2	3	81544	Integrin beta OS=Homo sapiens OX=9606 GN=ITGB6 PE=1 SV=1
sp|P18564|ITB6_HUMAN	90.81	4	2573800	3	2	3	85936	Integrin beta-6 OS=Homo sapiens OX=9606 GN=ITGB6 PE=1 SV=2
tr|A0A087X0Q4|A0A087X0Q4_HUMAN	90.71	19	9195600	4	3	4	11434	Immunoglobulin kappa variable 2-40 OS=Homo sapiens OX=9606 GN=IGKV2-40 PE=1 SV=1
sp|P01615|KVD28_HUMAN	90.71	17	9195600	4	3	4	12957	Immunoglobulin kappa variable 2D-28 OS=Homo sapiens OX=9606 GN=IGKV2D-28 PE=1 SV=2
sp|A0A075B6P5|KV228_HUMAN	90.71	17	9195600	4	3	4	12957	Immunoglobulin kappa variable 2-28 OS=Homo sapiens OX=9606 GN=IGKV2-28 PE=3 SV=1
sp|P01614|KVD40_HUMAN	90.71	17	9195600	4	3	4	13310	Immunoglobulin kappa variable 2D-40 OS=Homo sapiens OX=9606 GN=IGKV2D-40 PE=1 SV=2
sp|A0A087WW87|KV240_HUMAN	90.71	17	9195600	4	3	4	13310	Immunoglobulin kappa variable 2-40 OS=Homo sapiens OX=9606 GN=IGKV2-40 PE=3 SV=2
tr|Q5JR08|Q5JR08_HUMAN	90.61	26	3426800	6	5	7	21523	Rho-related GTP-binding protein RhoC (Fragment) OS=Homo sapiens OX=9606 GN=RHOC PE=1 SV=8
sp|P08134|RHOC_HUMAN	90.61	25	3426800	6	5	7	22006	Rho-related GTP-binding protein RhoC OS=Homo sapiens OX=9606 GN=RHOC PE=1 SV=1
sp|Q8WUM4|PDC6I_HUMAN	90.46	7	3144500	6	6	8	96023	Programmed cell death 6-interacting protein OS=Homo sapiens OX=9606 GN=PDCD6IP PE=1 SV=1
sp|P23246|SFPQ_HUMAN	90.26	6	2261200	3	3	3	76150	Splicing factor proline- and glutamine-rich OS=Homo sapiens OX=9606 GN=SFPQ PE=1 SV=2
tr|A0A0B4J1W3|A0A0B4J1W3_HUMAN	89.97	6	6227400	5	5	7	101201	N-alpha-acetyltransferase 15 NatA auxiliary subunit OS=Homo sapiens OX=9606 GN=NAA15 PE=1 SV=1
sp|Q9BXJ9|NAA15_HUMAN	89.97	6	6227400	5	5	7	101272	N-alpha-acetyltransferase 15 NatA auxiliary subunit OS=Homo sapiens OX=9606 GN=NAA15 PE=1 SV=1
sp|O95292|VAPB_HUMAN	89.67	19	142470	3	1	3	27228	Vesicle-associated membrane protein-associated protein B/C OS=Homo sapiens OX=9606 GN=VAPB PE=1 SV=3
sp|O14949|QCR8_HUMAN	88.9	39	4160000	4	4	8	9906	Cytochrome b-c1 complex subunit 8 OS=Homo sapiens OX=9606 GN=UQCRQ PE=1 SV=4
tr|F5H423|F5H423_HUMAN	88.44	26	453450	4	1	5	23346	Uncharacterized protein OS=Homo sapiens OX=9606 PE=3 SV=1
sp|P61204|ARF3_HUMAN	88.44	30	453450	4	1	5	20601	ADP-ribosylation factor 3 OS=Homo sapiens OX=9606 GN=ARF3 PE=1 SV=2
sp|P84077|ARF1_HUMAN	88.44	30	453450	4	1	5	20697	ADP-ribosylation factor 1 OS=Homo sapiens OX=9606 GN=ARF1 PE=1 SV=2
tr|F5H0C7|F5H0C7_HUMAN	88.44	44	453450	3	1	4	11619	ADP-ribosylation factor 3 (Fragment) OS=Homo sapiens OX=9606 GN=ARF3 PE=1 SV=1
tr|H0Y6T7|H0Y6T7_HUMAN	88.43	10	2919900	3	3	3	30165	Nicastrin (Fragment) OS=Homo sapiens OX=9606 GN=NCSTN PE=1 SV=1
sp|Q92542|NICA_HUMAN	88.43	4	2919900	3	3	3	78411	Nicastrin OS=Homo sapiens OX=9606 GN=NCSTN PE=1 SV=2
sp|O60762|DPM1_HUMAN	88.36	8	1622100	2	2	2	29634	Dolichol-phosphate mannosyltransferase subunit 1 OS=Homo sapiens OX=9606 GN=DPM1 PE=1 SV=1
tr|Q5QPK2|Q5QPK2_HUMAN	88.36	8	1622100	2	2	2	32426	Dolichol-phosphate mannosyltransferase subunit 1 OS=Homo sapiens OX=9606 GN=DPM1 PE=1 SV=1
tr|H0Y368|H0Y368_HUMAN	88.36	7	1622100	2	2	2	33337	Dolichol-phosphate mannosyltransferase subunit 1 (Fragment) OS=Homo sapiens OX=9606 GN=DPM1 PE=1 SV=1
tr|B1AKQ8|B1AKQ8_HUMAN	88.31	43	6339600	4	4	4	12198	Guanine nucleotide-binding protein G(I)/G(S)/G(T) subunit beta-1 (Fragment) OS=Homo sapiens OX=9606 GN=GNB1 PE=1 SV=8
tr|F6X3N5|F6X3N5_HUMAN	88.31	28	6339600	4	4	4	18340	Guanine nucleotide-binding protein G(I)/G(S)/G(T) subunit beta-1 (Fragment) OS=Homo sapiens OX=9606 GN=GNB1 PE=1 SV=1
tr|F6UT28|F6UT28_HUMAN	88.31	28	6339600	4	4	4	18426	Guanine nucleotide-binding protein G(I)/G(S)/G(T) subunit beta-1 (Fragment) OS=Homo sapiens OX=9606 GN=GNB1 PE=1 SV=1
sp|P62873|GBB1_HUMAN	88.31	14	6339600	4	4	4	37377	Guanine nucleotide-binding protein G(I)/G(S)/G(T) subunit beta-1 OS=Homo sapiens OX=9606 GN=GNB1 PE=1 SV=3
tr|A0A286YF37|A0A286YF37_HUMAN	88.25	10	3098100	2	2	2	30419	F-box only protein 2 (Fragment) OS=Homo sapiens OX=9606 GN=FBXO2 PE=1 SV=1
sp|Q9UK22|FBX2_HUMAN	88.25	9	3098100	2	2	2	33328	F-box only protein 2 OS=Homo sapiens OX=9606 GN=FBXO2 PE=1 SV=2
sp|P09382|LEG1_HUMAN	88.11	37	7241800	5	5	5	14716	Galectin-1 OS=Homo sapiens OX=9606 GN=LGALS1 PE=1 SV=2
sp|O75340|PDCD6_HUMAN	87.99	23	2207100	4	4	4	21868	Programmed cell death protein 6 OS=Homo sapiens OX=9606 GN=PDCD6 PE=1 SV=1
tr|A0A024QZ42|A0A024QZ42_HUMAN	87.99	36	2207100	4	4	4	14450	HCG1985580 isoform CRA_c OS=Homo sapiens OX=9606 GN=PDCD6 PE=1 SV=1
sp|P10620|MGST1_HUMAN	87.76	18	4225400	2	2	3	17599	Microsomal glutathione S-transferase 1 OS=Homo sapiens OX=9606 GN=MGST1 PE=1 SV=1
sp|P01597|KV139_HUMAN	86.76	37	1019300000	3	2	11	12737	Immunoglobulin kappa variable 1-39 OS=Homo sapiens OX=9606 GN=IGKV1-39 PE=1 SV=2
sp|P04432|KVD39_HUMAN	86.76	37	1019300000	3	2	11	12737	Immunoglobulin kappa variable 1D-39 OS=Homo sapiens OX=9606 GN=IGKV1D-39 PE=3 SV=2
sp|A0A0C4DH72|KV106_HUMAN	86.76	14	1019200000	2	1	10	12697	Immunoglobulin kappa variable 1-6 OS=Homo sapiens OX=9606 GN=IGKV1-6 PE=3 SV=1
sp|P01611|KVD12_HUMAN	86.76	14	1019200000	2	1	10	12620	Immunoglobulin kappa variable 1D-12 OS=Homo sapiens OX=9606 GN=IGKV1D-12 PE=1 SV=2
sp|A0A0C4DH73|KV112_HUMAN	86.76	14	1019200000	2	1	10	12645	Immunoglobulin kappa variable 1-12 OS=Homo sapiens OX=9606 GN=IGKV1-12 PE=3 SV=1
tr|A0A075B7D4|A0A075B7D4_HUMAN	86.76	14	1019200000	2	1	10	12535	Immunoglobulin kappa variable 1/OR2-108 (non-functional) (Fragment) OS=Homo sapiens OX=9606 GN=IGKV1OR2-108 PE=1 SV=1
sp|Q07021|C1QBP_HUMAN	86.44	17	2077900	2	2	3	31362	Complement component 1 Q subcomponent-binding protein mitochondrial OS=Homo sapiens OX=9606 GN=C1QBP PE=1 SV=1
sp|P32119|PRDX2_HUMAN	86.06	27	1078700	4	3	4	21892	Peroxiredoxin-2 OS=Homo sapiens OX=9606 GN=PRDX2 PE=1 SV=5
sp|Q6XQN6|PNCB_HUMAN	85.65	4	1244600	2	2	2	57578	Nicotinate phosphoribosyltransferase OS=Homo sapiens OX=9606 GN=NAPRT PE=1 SV=2
tr|G5E977|G5E977_HUMAN	85.65	4	1244600	2	2	2	62172	Nicotinate phosphoribosyltransferase OS=Homo sapiens OX=9606 GN=NAPRT PE=1 SV=1
sp|Q96QK1|VPS35_HUMAN	85.33	5	2400400	4	4	4	91707	Vacuolar protein sorting-associated protein 35 OS=Homo sapiens OX=9606 GN=VPS35 PE=1 SV=2
sp|P13073|COX41_HUMAN	84.62	25	13837000	4	4	5	19577	Cytochrome c oxidase subunit 4 isoform 1 mitochondrial OS=Homo sapiens OX=9606 GN=COX4I1 PE=1 SV=1
sp|Q2M2I5|K1C24_HUMAN	84.48	5	1071700	3	1	4	55087	Keratin type I cytoskeletal 24 OS=Homo sapiens OX=9606 GN=KRT24 PE=1 SV=1
sp|Q9P2B2|FPRP_HUMAN	84.37	9	6881700	7	7	8	98556	Prostaglandin F2 receptor negative regulator OS=Homo sapiens OX=9606 GN=PTGFRN PE=1 SV=2
sp|Q96IX5|USMG5_HUMAN	84.13	28	3545400	2	2	2	6458	Up-regulated during skeletal muscle growth protein 5 OS=Homo sapiens OX=9606 GN=ATP5MD PE=1 SV=1
sp|Q9UBM7|DHCR7_HUMAN	84.01	8	6334100	4	4	5	54489	7-dehydrocholesterol reductase OS=Homo sapiens OX=9606 GN=DHCR7 PE=1 SV=1
sp|P41219|PERI_HUMAN	83.92	8	23351000	5	1	9	53651	Peripherin OS=Homo sapiens OX=9606 GN=PRPH PE=1 SV=2
sp|Q9Y241|HIG1A_HUMAN	83.63	28	2858300	2	2	2	10143	HIG1 domain family member 1A mitochondrial OS=Homo sapiens OX=9606 GN=HIGD1A PE=1 SV=1
tr|A0A2R8YDQ9|A0A2R8YDQ9_HUMAN	83.47	14	4117600	6	6	6	43842	Succinate--CoA ligase [ADP-forming] subunit beta mitochondrial OS=Homo sapiens OX=9606 GN=SUCLA2 PE=1 SV=1
sp|Q9P2R7|SUCB1_HUMAN	83.47	12	4117600	6	6	6	50317	Succinate--CoA ligase [ADP-forming] subunit beta mitochondrial OS=Homo sapiens OX=9606 GN=SUCLA2 PE=1 SV=3
tr|A0A2R8Y6Y7|A0A2R8Y6Y7_HUMAN	83.47	11	4117600	6	6	6	52612	Succinate--CoA ligase [ADP-forming] subunit beta mitochondrial OS=Homo sapiens OX=9606 GN=SUCLA2 PE=1 SV=1
sp|Q9BRX8|PXL2A_HUMAN	83.07	20	1868400	4	4	5	25764	Peroxiredoxin-like 2A OS=Homo sapiens OX=9606 GN=PRXL2A PE=1 SV=3
sp|O75964|ATP5L_HUMAN	82.9	40	9797000	4	4	5	11428	ATP synthase subunit g mitochondrial OS=Homo sapiens OX=9606 GN=ATP5MG PE=1 SV=3
sp|Q9C0C2|TB182_HUMAN	82.79	3	1340100	4	4	4	181795	182 kDa tankyrase-1-binding protein OS=Homo sapiens OX=9606 GN=TNKS1BP1 PE=1 SV=4
sp|P26641|EF1G_HUMAN	82.7	12	5623600	5	5	5	50119	Elongation factor 1-gamma OS=Homo sapiens OX=9606 GN=EEF1G PE=1 SV=3
sp|Q9UHQ9|NB5R1_HUMAN	82.69	10	2383700	3	3	3	34095	NADH-cytochrome b5 reductase 1 OS=Homo sapiens OX=9606 GN=CYB5R1 PE=1 SV=1
sp|P62714|PP2AB_HUMAN	82.64	8	2904800	3	3	4	35575	Serine/threonine-protein phosphatase 2A catalytic subunit beta isoform OS=Homo sapiens OX=9606 GN=PPP2CB PE=1 SV=1
sp|P67775|PP2AA_HUMAN	82.64	8	2904800	3	3	4	35594	Serine/threonine-protein phosphatase 2A catalytic subunit alpha isoform OS=Homo sapiens OX=9606 GN=PPP2CA PE=1 SV=1
sp|Q14739|LBR_HUMAN	82.5	5	4993500	3	3	4	70703	Delta(14)-sterol reductase OS=Homo sapiens OX=9606 GN=LBR PE=1 SV=2
tr|C9JXK0|C9JXK0_HUMAN	82.5	11	1816000	2	2	2	24284	Lamin-B receptor (Fragment) OS=Homo sapiens OX=9606 GN=LBR PE=1 SV=1
sp|P0CF74|IGLC6_HUMAN	82.36	39	6579300	3	2	8	11277	Immunoglobulin lambda constant 6 OS=Homo sapiens OX=9606 GN=IGLC6 PE=1 SV=1
sp|Q12904|AIMP1_HUMAN	82.07	14	2920100	3	3	3	34353	Aminoacyl tRNA synthase complex-interacting multifunctional protein 1 OS=Homo sapiens OX=9606 GN=AIMP1 PE=1 SV=2
tr|K7EIV0|K7EIV0_HUMAN	81.72	11	792080	2	2	2	22104	Calpain small subunit 1 (Fragment) OS=Homo sapiens OX=9606 GN=CAPNS1 PE=1 SV=2
sp|P04632|CPNS1_HUMAN	81.72	8	792080	2	2	2	28316	Calpain small subunit 1 OS=Homo sapiens OX=9606 GN=CAPNS1 PE=1 SV=1
tr|K7ELJ7|K7ELJ7_HUMAN	81.72	8	792080	2	2	2	29440	Calpain small subunit 1 OS=Homo sapiens OX=9606 GN=CAPNS1 PE=1 SV=1
tr|A0A0C4DGQ5|A0A0C4DGQ5_HUMAN	81.72	7	792080	2	2	2	33786	Calpain small subunit 1 OS=Homo sapiens OX=9606 GN=CAPNS1 PE=1 SV=1
tr|U3KQE2|U3KQE2_HUMAN	81.72	14	792080	2	2	2	18446	Calpain small subunit 1 (Fragment) OS=Homo sapiens OX=9606 GN=CAPNS1 PE=1 SV=1
tr|A0A075B7C0|A0A075B7C0_HUMAN	81.72	11	792080	2	2	2	21912	Calpain small subunit 1 (Fragment) OS=Homo sapiens OX=9606 GN=CAPNS1 PE=1 SV=1
sp|Q99878|H2A1J_HUMAN	81.6	22	10127000	2	2	2	13936	Histone H2A type 1-J OS=Homo sapiens OX=9606 GN=HIST1H2AJ PE=1 SV=3
sp|Q96KK5|H2A1H_HUMAN	81.6	22	10127000	2	2	2	13906	Histone H2A type 1-H OS=Homo sapiens OX=9606 GN=HIST1H2AH PE=1 SV=3
sp|Q9BTM1|H2AJ_HUMAN	81.6	22	10127000	2	2	2	14019	Histone H2A.J OS=Homo sapiens OX=9606 GN=H2AFJ PE=1 SV=1
sp|Q16777|H2A2C_HUMAN	81.6	22	10127000	2	2	2	13988	Histone H2A type 2-C OS=Homo sapiens OX=9606 GN=HIST2H2AC PE=1 SV=4
sp|Q6FI13|H2A2A_HUMAN	81.6	22	10127000	2	2	2	14095	Histone H2A type 2-A OS=Homo sapiens OX=9606 GN=HIST2H2AA3 PE=1 SV=3
sp|P20671|H2A1D_HUMAN	81.6	22	10127000	2	2	2	14107	Histone H2A type 1-D OS=Homo sapiens OX=9606 GN=HIST1H2AD PE=1 SV=2
sp|P0C0S8|H2A1_HUMAN	81.6	22	10127000	2	2	2	14091	Histone H2A type 1 OS=Homo sapiens OX=9606 GN=HIST1H2AG PE=1 SV=2
sp|Q8IUE6|H2A2B_HUMAN	81.6	22	10127000	2	2	2	13995	Histone H2A type 2-B OS=Homo sapiens OX=9606 GN=HIST2H2AB PE=1 SV=3
sp|P04908|H2A1B_HUMAN	81.6	22	10127000	2	2	2	14135	Histone H2A type 1-B/E OS=Homo sapiens OX=9606 GN=HIST1H2AB PE=1 SV=2
sp|Q93077|H2A1C_HUMAN	81.6	22	10127000	2	2	2	14105	Histone H2A type 1-C OS=Homo sapiens OX=9606 GN=HIST1H2AC PE=1 SV=3
sp|Q7L7L0|H2A3_HUMAN	81.6	22	10127000	2	2	2	14121	Histone H2A type 3 OS=Homo sapiens OX=9606 GN=HIST3H2A PE=1 SV=3
sp|Q96QV6|H2A1A_HUMAN	81.6	21	10127000	2	2	2	14233	Histone H2A type 1-A OS=Homo sapiens OX=9606 GN=HIST1H2AA PE=1 SV=3
sp|P16104|H2AX_HUMAN	81.6	20	10127000	2	2	2	15145	Histone H2AX OS=Homo sapiens OX=9606 GN=H2AFX PE=1 SV=2
tr|A0A0U1RR32|A0A0U1RR32_HUMAN	81.6	17	10127000	2	2	2	18482	Histone H2A OS=Homo sapiens OX=9606 GN=hCG_2039566 PE=3 SV=1
tr|A0A0U1RRH7|A0A0U1RRH7_HUMAN	81.6	16	10127000	2	2	2	18553	Histone H2A OS=Homo sapiens OX=9606 PE=3 SV=1
sp|P51148|RAB5C_HUMAN	81.53	19	2535100	3	2	3	23483	Ras-related protein Rab-5C OS=Homo sapiens OX=9606 GN=RAB5C PE=1 SV=2
tr|F8W696|F8W696_HUMAN	81.45	14	6786300	4	4	5	27909	Apolipoprotein A-I OS=Homo sapiens OX=9606 GN=APOA1 PE=1 SV=1
sp|P02647|APOA1_HUMAN	81.45	13	6786300	4	4	5	30778	Apolipoprotein A-I OS=Homo sapiens OX=9606 GN=APOA1 PE=1 SV=1
tr|H0YMU3|H0YMU3_HUMAN	81.44	17	3312600	3	3	5	19247	Isocitrate dehydrogenase [NAD] subunit alpha mitochondrial (Fragment) OS=Homo sapiens OX=9606 GN=IDH3A PE=1 SV=1
tr|H0YL72|H0YL72_HUMAN	81.44	9	3312600	3	3	5	35786	Isocitrate dehydrogenase [NAD] subunit alpha mitochondrial OS=Homo sapiens OX=9606 GN=IDH3A PE=1 SV=1
sp|P50213|IDH3A_HUMAN	81.44	8	3312600	3	3	5	39592	Isocitrate dehydrogenase [NAD] subunit alpha mitochondrial OS=Homo sapiens OX=9606 GN=IDH3A PE=1 SV=1
tr|E9PLL6|E9PLL6_HUMAN	81.03	24	20407000	3	3	3	12201	60S ribosomal protein L27a OS=Homo sapiens OX=9606 GN=RPL27A PE=1 SV=1
sp|P46776|RL27A_HUMAN	81.03	18	20407000	3	3	3	16561	60S ribosomal protein L27a OS=Homo sapiens OX=9606 GN=RPL27A PE=1 SV=2
tr|E9PJD9|E9PJD9_HUMAN	81.03	14	11751000	2	2	2	10127	60S ribosomal protein L27a OS=Homo sapiens OX=9606 GN=RPL27A PE=1 SV=1
tr|E9PLX7|E9PLX7_HUMAN	81.03	12	11751000	2	2	2	12477	60S ribosomal protein L27a OS=Homo sapiens OX=9606 GN=RPL27A PE=1 SV=1
sp|P62899|RL31_HUMAN	80.57	49	10817000	5	5	7	14463	60S ribosomal protein L31 OS=Homo sapiens OX=9606 GN=RPL31 PE=1 SV=1
sp|P52907|CAZA1_HUMAN	80.43	24	2566900	5	5	5	32923	F-actin-capping protein subunit alpha-1 OS=Homo sapiens OX=9606 GN=CAPZA1 PE=1 SV=3
sp|Q6RW13|ATRAP_HUMAN	80.36	14	618300	1	1	1	17419	Type-1 angiotensin II receptor-associated protein OS=Homo sapiens OX=9606 GN=AGTRAP PE=1 SV=1
tr|F5GXJ9|F5GXJ9_HUMAN	79.9	8	2468500	4	4	4	59529	CD166 antigen OS=Homo sapiens OX=9606 GN=ALCAM PE=1 SV=1
sp|Q13740|CD166_HUMAN	79.9	7	2468500	4	4	4	65102	CD166 antigen OS=Homo sapiens OX=9606 GN=ALCAM PE=1 SV=2
tr|B4DR61|B4DR61_HUMAN	79.9	6	1307800	2	2	2	52950	cDNA FLJ59739 highly similar to Protein transport protein Sec61 subunit alpha isoform 1 OS=Homo sapiens OX=9606 GN=SEC61A1 PE=1 SV=1
sp|P61619|S61A1_HUMAN	79.9	6	1307800	2	2	2	52265	Protein transport protein Sec61 subunit alpha isoform 1 OS=Homo sapiens OX=9606 GN=SEC61A1 PE=1 SV=2
sp|Q6PIU2|NCEH1_HUMAN	79.89	7	788450	2	2	2	45808	Neutral cholesterol ester hydrolase 1 OS=Homo sapiens OX=9606 GN=NCEH1 PE=1 SV=3
tr|A0A0R4J2G3|A0A0R4J2G3_HUMAN	79.89	6	788450	2	2	2	49063	Arylacetamide deacetylase-like 1 OS=Homo sapiens OX=9606 GN=NCEH1 PE=1 SV=1
tr|A0A0A0MTJ9|A0A0A0MTJ9_HUMAN	79.89	6	788450	2	2	2	49881	Neutral cholesterol ester hydrolase 1 OS=Homo sapiens OX=9606 GN=NCEH1 PE=1 SV=1
sp|P78386|KRT85_HUMAN	79.78	7	615610	4	1	6	55802	Keratin type II cuticular Hb5 OS=Homo sapiens OX=9606 GN=KRT85 PE=1 SV=1
tr|A0A087X2E5|A0A087X2E5_HUMAN	79.54	11	3812200	5	5	5	41220	Isocitrate dehydrogenase [NAD] subunit mitochondrial OS=Homo sapiens OX=9606 GN=IDH3B PE=1 SV=1
sp|O43837|IDH3B_HUMAN	79.54	10	3812200	5	5	5	42184	Isocitrate dehydrogenase [NAD] subunit beta mitochondrial OS=Homo sapiens OX=9606 GN=IDH3B PE=1 SV=2
tr|A0A087WZN1|A0A087WZN1_HUMAN	79.54	10	3812200	5	5	5	42411	Isocitrate dehydrogenase [NAD] subunit mitochondrial OS=Homo sapiens OX=9606 GN=IDH3B PE=1 SV=1
sp|P10606|COX5B_HUMAN	79.48	29	5774700	3	3	3	13696	Cytochrome c oxidase subunit 5B mitochondrial OS=Homo sapiens OX=9606 GN=COX5B PE=1 SV=2
sp|Q8WWC4|MAIP1_HUMAN	79.34	9	1582700	2	2	2	32545	m-AAA protease-interacting protein 1 mitochondrial OS=Homo sapiens OX=9606 GN=MAIP1 PE=1 SV=1
sp|P54709|AT1B3_HUMAN	79.3	16	10511000	4	4	4	31513	Sodium/potassium-transporting ATPase subunit beta-3 OS=Homo sapiens OX=9606 GN=ATP1B3 PE=1 SV=1
tr|A0A1B0GVS3|A0A1B0GVS3_HUMAN	79.3	18	3293100	3	3	4	24957	Alpha-centractin OS=Homo sapiens OX=9606 GN=ACTR1A PE=1 SV=1
tr|R4GMT0|R4GMT0_HUMAN	79.3	12	3293100	3	3	4	37434	Alpha-centractin OS=Homo sapiens OX=9606 GN=ACTR1A PE=1 SV=1
sp|P61163|ACTZ_HUMAN	79.3	11	3293100	3	3	4	42614	Alpha-centractin OS=Homo sapiens OX=9606 GN=ACTR1A PE=1 SV=1
sp|Q9BVC6|TM109_HUMAN	79.16	9	3077300	2	2	2	26210	Transmembrane protein 109 OS=Homo sapiens OX=9606 GN=TMEM109 PE=1 SV=1
tr|F5H6T1|F5H6T1_HUMAN	79.05	7	784700	2	2	2	38842	Actin-related protein 2 OS=Homo sapiens OX=9606 GN=ACTR2 PE=1 SV=2
sp|P61160|ARP2_HUMAN	79.05	6	784700	2	2	2	44761	Actin-related protein 2 OS=Homo sapiens OX=9606 GN=ACTR2 PE=1 SV=1
sp|O60488|ACSL4_HUMAN	79	4	155150	2	1	3	79188	Long-chain-fatty-acid--CoA ligase 4 OS=Homo sapiens OX=9606 GN=ACSL4 PE=1 SV=2
sp|P63104|1433Z_HUMAN	78.92	20	2150900	5	3	6	27745	14-3-3 protein zeta/delta OS=Homo sapiens OX=9606 GN=YWHAZ PE=1 SV=1
tr|E7EX29|E7EX29_HUMAN	78.92	20	2150900	5	3	6	28037	14-3-3 protein zeta/delta (Fragment) OS=Homo sapiens OX=9606 GN=YWHAZ PE=1 SV=1
tr|D6RBD7|D6RBD7_HUMAN	78.91	14	1647000	2	2	2	16686	Eukaryotic translation elongation factor 1 epsilon-1 OS=Homo sapiens OX=9606 GN=EEF1E1 PE=4 SV=1
tr|C9J1V9|C9J1V9_HUMAN	78.91	14	1647000	2	2	2	17018	EEF1E1-BLOC1S5 readthrough (NMD candidate) OS=Homo sapiens OX=9606 GN=EEF1E1-BLOC1S5 PE=4 SV=2
sp|O43324|MCA3_HUMAN	78.91	12	1647000	2	2	2	19811	Eukaryotic translation elongation factor 1 epsilon-1 OS=Homo sapiens OX=9606 GN=EEF1E1 PE=1 SV=1
sp|P31930|QCR1_HUMAN	78.69	12	2949200	5	5	6	52646	Cytochrome b-c1 complex subunit 1 mitochondrial OS=Homo sapiens OX=9606 GN=UQCRC1 PE=1 SV=3
sp|Q9BVK6|TMED9_HUMAN	78.54	14	2332700	4	3	4	27277	Transmembrane emp24 domain-containing protein 9 OS=Homo sapiens OX=9606 GN=TMED9 PE=1 SV=2
tr|A0A0A6YYA0|A0A0A6YYA0_HUMAN	78.16	18	8349000	4	4	7	21233	Protein TMED7-TICAM2 OS=Homo sapiens OX=9606 GN=TMED7-TICAM2 PE=3 SV=1
sp|Q9Y3B3|TMED7_HUMAN	78.16	15	8349000	4	4	7	25172	Transmembrane emp24 domain-containing protein 7 OS=Homo sapiens OX=9606 GN=TMED7 PE=1 SV=2
sp|P0DOY3|IGLC3_HUMAN	77.92	24	1096800	2	1	9	11266	Immunoglobulin lambda constant 3 OS=Homo sapiens OX=9606 GN=IGLC3 PE=1 SV=1
sp|P0DOY2|IGLC2_HUMAN	77.92	24	1096800	2	1	9	11294	Immunoglobulin lambda constant 2 OS=Homo sapiens OX=9606 GN=IGLC2 PE=1 SV=1
sp|Q13263|TIF1B_HUMAN	77.67	6	1545800	2	2	2	88550	Transcription intermediary factor 1-beta OS=Homo sapiens OX=9606 GN=TRIM28 PE=1 SV=5
sp|P50281|MMP14_HUMAN	77.26	6	2058400	4	4	5	65894	Matrix metalloproteinase-14 OS=Homo sapiens OX=9606 GN=MMP14 PE=1 SV=3
sp|O95373|IPO7_HUMAN	77.2	4	3697600	4	4	5	119516	Importin-7 OS=Homo sapiens OX=9606 GN=IPO7 PE=1 SV=1
sp|O15427|MOT4_HUMAN	77.02	13	15170000	6	6	8	49469	Monocarboxylate transporter 4 OS=Homo sapiens OX=9606 GN=SLC16A3 PE=1 SV=1
sp|Q7L576|CYFP1_HUMAN	76.98	3	2345900	4	4	7	145182	Cytoplasmic FMR1-interacting protein 1 OS=Homo sapiens OX=9606 GN=CYFIP1 PE=1 SV=1
tr|E7EVJ5|E7EVJ5_HUMAN	76.98	3	2107900	3	3	6	142577	Cytoplasmic FMR1-interacting protein OS=Homo sapiens OX=9606 GN=CYFIP2 PE=1 SV=1
sp|Q96F07|CYFP2_HUMAN	76.98	3	2107900	3	3	6	148398	Cytoplasmic FMR1-interacting protein 2 OS=Homo sapiens OX=9606 GN=CYFIP2 PE=1 SV=2
tr|H7C229|H7C229_HUMAN	76.98	3	2107900	3	3	6	129702	Cytoplasmic FMR1-interacting protein 2 OS=Homo sapiens OX=9606 GN=CYFIP2 PE=1 SV=2
tr|E7EW33|E7EW33_HUMAN	76.98	2	2107900	2	2	5	122459	Cytoplasmic FMR1-interacting protein 2 OS=Homo sapiens OX=9606 GN=CYFIP2 PE=1 SV=1
tr|H0YL50|H0YL50_HUMAN	76.98	13	2107900	2	2	5	20225	Cytoplasmic FMR1-interacting protein 1 (Fragment) OS=Homo sapiens OX=9606 GN=CYFIP1 PE=1 SV=1
sp|Q969L2|MAL2_HUMAN	76.92	18	4121300	2	2	3	19125	Protein MAL2 OS=Homo sapiens OX=9606 GN=MAL2 PE=1 SV=1
sp|Q9HCY8|S10AE_HUMAN	76.91	37	1700100	3	2	4	11662	Protein S100-A14 OS=Homo sapiens OX=9606 GN=S100A14 PE=1 SV=1
sp|P07237|PDIA1_HUMAN	76.8	7	2212100	4	4	6	57116	Protein disulfide-isomerase OS=Homo sapiens OX=9606 GN=P4HB PE=1 SV=3
sp|Q9Y4W6|AFG32_HUMAN	76.36	6	3139800	5	5	5	88584	AFG3-like protein 2 OS=Homo sapiens OX=9606 GN=AFG3L2 PE=1 SV=2
sp|P62195|PRS8_HUMAN	76.32	11	851890	3	2	4	45626	26S proteasome regulatory subunit 8 OS=Homo sapiens OX=9606 GN=PSMC5 PE=1 SV=1
tr|J3QQM1|J3QQM1_HUMAN	76.32	17	851890	3	2	4	29347	26S proteasome regulatory subunit 8 (Fragment) OS=Homo sapiens OX=9606 GN=PSMC5 PE=1 SV=1
sp|P50990|TCPQ_HUMAN	75.63	6	185840	3	3	3	59621	T-complex protein 1 subunit theta OS=Homo sapiens OX=9606 GN=CCT8 PE=1 SV=4
tr|K7EJL1|K7EJL1_HUMAN	75.53	6	2010300	2	2	2	40296	AP-1 complex subunit mu-1 OS=Homo sapiens OX=9606 GN=AP1M1 PE=1 SV=1
sp|Q9BXS5|AP1M1_HUMAN	75.53	5	2010300	2	2	2	48587	AP-1 complex subunit mu-1 OS=Homo sapiens OX=9606 GN=AP1M1 PE=1 SV=3
tr|E7ENJ6|E7ENJ6_HUMAN	75.53	6	2010300	2	2	2	42636	AP-1 complex subunit mu-1 OS=Homo sapiens OX=9606 GN=AP1M1 PE=1 SV=1
sp|P69891|HBG1_HUMAN	75.46	16	0	2	1	2	16140	Hemoglobin subunit gamma-1 OS=Homo sapiens OX=9606 GN=HBG1 PE=1 SV=2
sp|P69892|HBG2_HUMAN	75.46	16	0	2	1	2	16126	Hemoglobin subunit gamma-2 OS=Homo sapiens OX=9606 GN=HBG2 PE=1 SV=2
tr|A0A2R8Y7X9|A0A2R8Y7X9_HUMAN	75.46	14	0	2	1	2	18420	Uncharacterized protein OS=Homo sapiens OX=9606 PE=3 SV=1
tr|H0Y8C6|H0Y8C6_HUMAN	75.41	3	394590	3	3	3	123867	Importin-5 (Fragment) OS=Homo sapiens OX=9606 GN=IPO5 PE=1 SV=1
sp|O00410|IPO5_HUMAN	75.41	3	394590	3	3	3	123630	Importin-5 OS=Homo sapiens OX=9606 GN=IPO5 PE=1 SV=4
sp|Q9NZT1|CALL5_HUMAN	75.24	17	3188000	2	2	2	15893	Calmodulin-like protein 5 OS=Homo sapiens OX=9606 GN=CALML5 PE=1 SV=2
sp|P46977|STT3A_HUMAN	74.95	7	7253600	6	6	7	80530	Dolichyl-diphosphooligosaccharide--protein glycosyltransferase subunit STT3A OS=Homo sapiens OX=9606 GN=STT3A PE=1 SV=2
sp|P09211|GSTP1_HUMAN	74.65	22	1811100	3	3	3	23356	Glutathione S-transferase P OS=Homo sapiens OX=9606 GN=GSTP1 PE=1 SV=2
sp|O15173|PGRC2_HUMAN	74.37	10	3203800	2	2	3	23818	Membrane-associated progesterone receptor component 2 OS=Homo sapiens OX=9606 GN=PGRMC2 PE=1 SV=1
tr|F8W7Q4|F8W7Q4_HUMAN	74.28	37	5470800	4	4	4	16515	Protein FAM162A OS=Homo sapiens OX=9606 GN=FAM162A PE=1 SV=1
sp|Q96A26|F162A_HUMAN	74.28	34	5470800	4	4	4	17342	Protein FAM162A OS=Homo sapiens OX=9606 GN=FAM162A PE=1 SV=2
sp|Q96HC4|PDLI5_HUMAN	74.25	7	3591000	2	2	2	63945	PDZ and LIM domain protein 5 OS=Homo sapiens OX=9606 GN=PDLIM5 PE=1 SV=5
tr|A0A0A0MSP3|A0A0A0MSP3_HUMAN	74.25	12	597950	1	1	1	29654	PDZ and LIM domain protein 5 OS=Homo sapiens OX=9606 GN=PDLIM5 PE=1 SV=1
tr|H0Y8Y3|H0Y8Y3_HUMAN	74.25	14	597950	1	1	1	24990	PDZ and LIM domain protein 5 (Fragment) OS=Homo sapiens OX=9606 GN=PDLIM5 PE=1 SV=1
sp|Q9NVJ2|ARL8B_HUMAN	74.13	23	3376400	3	3	5	21539	ADP-ribosylation factor-like protein 8B OS=Homo sapiens OX=9606 GN=ARL8B PE=1 SV=1
sp|P22735|TGM1_HUMAN	73.97	4	426880	2	2	2	89787	Protein-glutamine gamma-glutamyltransferase K OS=Homo sapiens OX=9606 GN=TGM1 PE=1 SV=4
sp|P38606|VATA_HUMAN	73.85	13	832570	6	6	6	68304	V-type proton ATPase catalytic subunit A OS=Homo sapiens OX=9606 GN=ATP6V1A PE=1 SV=2
sp|Q9NSE4|SYIM_HUMAN	73.81	8	821430	5	5	6	113791	Isoleucine--tRNA ligase mitochondrial OS=Homo sapiens OX=9606 GN=IARS2 PE=1 SV=2
sp|Q9BVP2|GNL3_HUMAN	73.65	4	1011800	2	2	2	61993	Guanine nucleotide-binding protein-like 3 OS=Homo sapiens OX=9606 GN=GNL3 PE=1 SV=2
sp|P57088|TMM33_HUMAN	73.54	9	4867500	2	2	2	27978	Transmembrane protein 33 OS=Homo sapiens OX=9606 GN=TMEM33 PE=1 SV=2
tr|D6RAA6|D6RAA6_HUMAN	73.54	9	4867500	2	2	2	25224	Transmembrane protein 33 (Fragment) OS=Homo sapiens OX=9606 GN=TMEM33 PE=1 SV=1
sp|A0A075B6K5|LV39_HUMAN	73.33	21	43797000	5	3	9	12332	Immunoglobulin lambda variable 3-9 OS=Homo sapiens OX=9606 GN=IGLV3-9 PE=3 SV=1
sp|P80748|LV321_HUMAN	73.33	21	43797000	5	3	9	12446	Immunoglobulin lambda variable 3-21 OS=Homo sapiens OX=9606 GN=IGLV3-21 PE=1 SV=2
sp|P07858|CATB_HUMAN	73.09	7	3594500	2	2	2	37822	Cathepsin B OS=Homo sapiens OX=9606 GN=CTSB PE=1 SV=3
sp|P62070|RRAS2_HUMAN	72.85	11	735820	2	1	2	23400	Ras-related protein R-Ras2 OS=Homo sapiens OX=9606 GN=RRAS2 PE=1 SV=1
sp|O00487|PSDE_HUMAN	72.58	12	694930	3	3	3	34577	26S proteasome non-ATPase regulatory subunit 14 OS=Homo sapiens OX=9606 GN=PSMD14 PE=1 SV=1
sp|Q9Y305|ACOT9_HUMAN	72.4	7	2223700	3	3	3	49902	Acyl-coenzyme A thioesterase 9 mitochondrial OS=Homo sapiens OX=9606 GN=ACOT9 PE=1 SV=2
sp|Q15392|DHC24_HUMAN	72.36	5	582360	3	3	3	60101	Delta(24)-sterol reductase OS=Homo sapiens OX=9606 GN=DHCR24 PE=1 SV=2
tr|A0A0A0MTI1|A0A0A0MTI1_HUMAN	72.36	5	582360	3	3	3	61447	Delta(24)-sterol reductase OS=Homo sapiens OX=9606 GN=DHCR24 PE=1 SV=1
sp|P46940|IQGA1_HUMAN	72.22	2	1419200	3	3	3	189251	Ras GTPase-activating-like protein IQGAP1 OS=Homo sapiens OX=9606 GN=IQGAP1 PE=1 SV=1
tr|A0A0J9YXZ5|A0A0J9YXZ5_HUMAN	72.22	3	1419200	3	3	3	136004	Ras GTPase-activating-like protein IQGAP1 OS=Homo sapiens OX=9606 GN=IQGAP1 PE=1 SV=1
sp|P01599|KV117_HUMAN	72.2	14	7691200	2	1	4	12779	Immunoglobulin kappa variable 1-17 OS=Homo sapiens OX=9606 GN=IGKV1-17 PE=1 SV=2
tr|B0QYA5|B0QYA5_HUMAN	71.75	10	1235200	2	2	2	31729	Eukaryotic translation initiation factor 3 subunit D (Fragment) OS=Homo sapiens OX=9606 GN=EIF3D PE=1 SV=1
sp|O15371|EIF3D_HUMAN	71.75	5	1235200	2	2	2	63973	Eukaryotic translation initiation factor 3 subunit D OS=Homo sapiens OX=9606 GN=EIF3D PE=1 SV=1
sp|P05161|ISG15_HUMAN	71.75	22	6056000	4	4	5	17888	Ubiquitin-like protein ISG15 OS=Homo sapiens OX=9606 GN=ISG15 PE=1 SV=5
sp|Q09666|AHNK_HUMAN	71.49	1	2224900	2	2	2	629114	Neuroblast differentiation-associated protein AHNAK OS=Homo sapiens OX=9606 GN=AHNAK PE=1 SV=2
tr|E9PQE3|E9PQE3_HUMAN	71.49	44	2224900	2	2	2	9251	Neuroblast differentiation-associated protein AHNAK (Fragment) OS=Homo sapiens OX=9606 GN=AHNAK PE=1 SV=8
tr|E9PJZ0|E9PJZ0_HUMAN	71.49	31	2224900	2	2	2	13218	Neuroblast differentiation-associated protein AHNAK (Fragment) OS=Homo sapiens OX=9606 GN=AHNAK PE=1 SV=1
tr|E9PKR9|E9PKR9_HUMAN	71.49	30	2224900	2	2	2	13602	Neuroblast differentiation-associated protein AHNAK (Fragment) OS=Homo sapiens OX=9606 GN=AHNAK PE=1 SV=1
tr|E9PJC6|E9PJC6_HUMAN	71.49	28	2224900	2	2	2	14531	Neuroblast differentiation-associated protein AHNAK OS=Homo sapiens OX=9606 GN=AHNAK PE=1 SV=1
tr|E9PLK4|E9PLK4_HUMAN	71.49	26	2224900	2	2	2	15904	Neuroblast differentiation-associated protein AHNAK (Fragment) OS=Homo sapiens OX=9606 GN=AHNAK PE=1 SV=1
sp|P20674|COX5A_HUMAN	70.85	27	3074400	3	3	8	16762	Cytochrome c oxidase subunit 5A mitochondrial OS=Homo sapiens OX=9606 GN=COX5A PE=1 SV=2
tr|H3BNX8|H3BNX8_HUMAN	70.85	27	3074400	3	3	8	17235	Cytochrome c oxidase subunit 5A mitochondrial OS=Homo sapiens OX=9606 GN=COX5A PE=1 SV=1
tr|H3BNC9|H3BNC9_HUMAN	70.77	4	2424900	2	2	4	64533	Uncharacterized protein OS=Homo sapiens OX=9606 PE=3 SV=2
sp|P08708|RS17_HUMAN	70.77	16	2424900	2	2	4	15550	40S ribosomal protein S17 OS=Homo sapiens OX=9606 GN=RPS17 PE=1 SV=2
tr|H0YN88|H0YN88_HUMAN	70.77	15	2424900	2	2	4	15920	40S ribosomal protein S17 OS=Homo sapiens OX=9606 GN=RPS17 PE=1 SV=1
tr|A0A075B716|A0A075B716_HUMAN	70.77	11	2424900	2	2	4	21643	40S ribosomal protein S17 OS=Homo sapiens OX=9606 GN=RPS17 PE=1 SV=1
sp|P30520|PURA2_HUMAN	70.62	8	1672800	3	3	3	50097	Adenylosuccinate synthetase isozyme 2 OS=Homo sapiens OX=9606 GN=ADSS PE=1 SV=3
sp|Q8NF37|PCAT1_HUMAN	70.21	2	271960	1	1	1	59151	Lysophosphatidylcholine acyltransferase 1 OS=Homo sapiens OX=9606 GN=LPCAT1 PE=1 SV=2
sp|A0A0C4DH67|KV108_HUMAN	69.95	14	170390000	2	2	5	12537	Immunoglobulin kappa variable 1-8 OS=Homo sapiens OX=9606 GN=IGKV1-8 PE=3 SV=1
tr|A0A0G2JQJ0|A0A0G2JQJ0_HUMAN	69.95	14	170390000	2	2	5	12865	Immunoglobulin kappa variable 1D-8 (Fragment) OS=Homo sapiens OX=9606 GN=IGKV1D-8 PE=1 SV=4
sp|A0A075B6S5|KV127_HUMAN	69.95	14	170390000	2	2	5	12712	Immunoglobulin kappa variable 1-27 OS=Homo sapiens OX=9606 GN=IGKV1-27 PE=3 SV=1
sp|A0A087WSZ0|KVD08_HUMAN	69.95	14	170390000	2	2	5	12837	Immunoglobulin kappa variable 1D-8 OS=Homo sapiens OX=9606 GN=IGKV1D-8 PE=3 SV=6
sp|A0A0C4DH69|KV109_HUMAN	69.95	14	170390000	2	2	5	12715	Immunoglobulin kappa variable 1-9 OS=Homo sapiens OX=9606 GN=IGKV1-9 PE=3 SV=1
sp|P02747|C1QC_HUMAN	69.94	13	38378000	3	3	5	25774	Complement C1q subcomponent subunit C OS=Homo sapiens OX=9606 GN=C1QC PE=1 SV=3
sp|P11498|PYC_HUMAN	69.71	3	831590	2	2	2	129634	Pyruvate carboxylase mitochondrial OS=Homo sapiens OX=9606 GN=PC PE=1 SV=2
sp|P31947|1433S_HUMAN	69.32	11	1775900	3	1	4	27774	14-3-3 protein sigma OS=Homo sapiens OX=9606 GN=SFN PE=1 SV=1
tr|Q5T985|Q5T985_HUMAN	68.99	5	2634700	4	4	4	105216	Inter-alpha-trypsin inhibitor heavy chain H2 OS=Homo sapiens OX=9606 GN=ITIH2 PE=1 SV=1
sp|P19823|ITIH2_HUMAN	68.99	5	2634700	4	4	4	106463	Inter-alpha-trypsin inhibitor heavy chain H2 OS=Homo sapiens OX=9606 GN=ITIH2 PE=1 SV=2
sp|Q5JWF2|GNAS1_HUMAN	68.94	4	674500	4	3	5	111024	Guanine nucleotide-binding protein G(s) subunit alpha isoforms XLas OS=Homo sapiens OX=9606 GN=GNAS PE=1 SV=2
sp|P63092|GNAS2_HUMAN	68.94	11	674500	4	3	5	45665	Guanine nucleotide-binding protein G(s) subunit alpha isoforms short OS=Homo sapiens OX=9606 GN=GNAS PE=1 SV=1
sp|P62191|PRS4_HUMAN	68.7	8	2550400	3	2	4	49185	26S proteasome regulatory subunit 4 OS=Homo sapiens OX=9606 GN=PSMC1 PE=1 SV=1
sp|Q12965|MYO1E_HUMAN	68.61	3	127240	3	2	4	127062	Unconventional myosin-Ie OS=Homo sapiens OX=9606 GN=MYO1E PE=1 SV=2
sp|O60701|UGDH_HUMAN	68.49	5	480790	2	2	2	55024	UDP-glucose 6-dehydrogenase OS=Homo sapiens OX=9606 GN=UGDH PE=1 SV=1
sp|P50416|CPT1A_HUMAN	68.48	3	105590	2	2	2	88368	Carnitine O-palmitoyltransferase 1 liver isoform OS=Homo sapiens OX=9606 GN=CPT1A PE=1 SV=2
tr|M0QZC5|M0QZC5_HUMAN	68.3	53	29035000	9	9	10	13997	40S ribosomal protein S11 OS=Homo sapiens OX=9606 GN=RPS11 PE=1 SV=1
sp|P62280|RS11_HUMAN	68.3	39	29035000	9	9	10	18431	40S ribosomal protein S11 OS=Homo sapiens OX=9606 GN=RPS11 PE=1 SV=3
sp|O15145|ARPC3_HUMAN	68.27	10	3487200	2	2	3	20547	Actin-related protein 2/3 complex subunit 3 OS=Homo sapiens OX=9606 GN=ARPC3 PE=1 SV=3
tr|Q8J015|Q8J015_HUMAN	67.89	15	3241800	2	2	2	16731	60S ribosomal protein L13a OS=Homo sapiens OX=9606 GN=RPL13A PE=1 SV=1
sp|P40429|RL13A_HUMAN	67.89	11	3241800	2	2	2	23577	60S ribosomal protein L13a OS=Homo sapiens OX=9606 GN=RPL13A PE=1 SV=2
tr|M0QYS1|M0QYS1_HUMAN	67.89	10	3241800	2	2	2	24224	60S ribosomal protein L13a (Fragment) OS=Homo sapiens OX=9606 GN=RPL13A PE=1 SV=2
sp|Q6NVV1|R13P3_HUMAN	67.89	22	3241800	2	2	2	12135	Putative 60S ribosomal protein L13a protein RPL13AP3 OS=Homo sapiens OX=9606 GN=RPL13AP3 PE=5 SV=1
tr|A6NNI4|A6NNI4_HUMAN	67.75	13	13328000	2	2	2	17764	Tetraspanin OS=Homo sapiens OX=9606 GN=CD9 PE=1 SV=1
tr|A0A2R8Y478|A0A2R8Y478_HUMAN	67.75	13	13328000	2	2	2	17680	Tetraspanin OS=Homo sapiens OX=9606 GN=CD9 PE=1 SV=1
sp|P21926|CD9_HUMAN	67.75	9	13328000	2	2	2	25416	CD9 antigen OS=Homo sapiens OX=9606 GN=CD9 PE=1 SV=4
tr|G8JLH6|G8JLH6_HUMAN	67.75	8	13328000	2	2	2	28124	Tetraspanin OS=Homo sapiens OX=9606 GN=CD9 PE=1 SV=2
tr|K7EMV3|K7EMV3_HUMAN	67.7	20	10854000	3	3	3	10334	Histone H3 OS=Homo sapiens OX=9606 GN=H3F3B PE=1 SV=1
tr|B4DEB1|B4DEB1_HUMAN	67.7	15	10854000	3	3	3	14053	Histone H3 OS=Homo sapiens OX=9606 GN=H3F3A PE=1 SV=1
tr|K7EK07|K7EK07_HUMAN	67.7	14	10854000	3	3	3	14914	Histone H3 (Fragment) OS=Homo sapiens OX=9606 GN=H3F3B PE=1 SV=1
sp|P68431|H31_HUMAN	67.7	13	10854000	3	3	3	15404	Histone H3.1 OS=Homo sapiens OX=9606 GN=HIST1H3A PE=1 SV=2
sp|Q71DI3|H32_HUMAN	67.7	13	10854000	3	3	3	15388	Histone H3.2 OS=Homo sapiens OX=9606 GN=HIST2H3A PE=1 SV=3
sp|P84243|H33_HUMAN	67.7	13	10854000	3	3	3	15328	Histone H3.3 OS=Homo sapiens OX=9606 GN=H3F3A PE=1 SV=2
sp|Q16695|H31T_HUMAN	67.7	13	10854000	3	3	3	15508	Histone H3.1t OS=Homo sapiens OX=9606 GN=HIST3H3 PE=1 SV=3
tr|K7ES00|K7ES00_HUMAN	67.7	12	10854000	3	3	3	16621	Histone H3.3 (Fragment) OS=Homo sapiens OX=9606 GN=H3F3B PE=1 SV=1
sp|O00203|AP3B1_HUMAN	67.65	2	371730	2	2	2	121320	AP-3 complex subunit beta-1 OS=Homo sapiens OX=9606 GN=AP3B1 PE=1 SV=3
sp|P18077|RL35A_HUMAN	67.5	43	8729400	6	6	6	12538	60S ribosomal protein L35a OS=Homo sapiens OX=9606 GN=RPL35A PE=1 SV=2
sp|Q96P70|IPO9_HUMAN	67.35	4	2264200	4	4	6	115963	Importin-9 OS=Homo sapiens OX=9606 GN=IPO9 PE=1 SV=3
sp|P08648|ITA5_HUMAN	67.34	4	2443700	2	2	2	114536	Integrin alpha-5 OS=Homo sapiens OX=9606 GN=ITGA5 PE=1 SV=2
tr|B4DDN1|B4DDN1_HUMAN	67.1	6	3328000	4	4	4	71739	Glutamine--tRNA ligase OS=Homo sapiens OX=9606 GN=QARS PE=1 SV=1
tr|A0A1B0GVU9|A0A1B0GVU9_HUMAN	67.1	5	3328000	4	4	4	83783	Glutamine--tRNA ligase (Fragment) OS=Homo sapiens OX=9606 GN=QARS PE=1 SV=1
sp|P47897|SYQ_HUMAN	67.1	5	3328000	4	4	4	87799	Glutamine--tRNA ligase OS=Homo sapiens OX=9606 GN=QARS PE=1 SV=1
sp|P62750|RL23A_HUMAN	66.99	13	8012200	2	2	2	17695	60S ribosomal protein L23a OS=Homo sapiens OX=9606 GN=RPL23A PE=1 SV=1
tr|K7EMA7|K7EMA7_HUMAN	66.99	30	8012200	2	2	2	7923	60S ribosomal protein L23a OS=Homo sapiens OX=9606 GN=RPL23A PE=1 SV=1
tr|H7BY10|H7BY10_HUMAN	66.99	13	8012200	2	2	2	17811	60S ribosomal protein L23a (Fragment) OS=Homo sapiens OX=9606 GN=RPL23A PE=1 SV=1
tr|K7EJV9|K7EJV9_HUMAN	66.99	12	8012200	2	2	2	19374	60S ribosomal protein L23a (Fragment) OS=Homo sapiens OX=9606 GN=RPL23A PE=1 SV=1
tr|K7ERT8|K7ERT8_HUMAN	66.99	12	8012200	2	2	2	19640	60S ribosomal protein L23a (Fragment) OS=Homo sapiens OX=9606 GN=RPL23A PE=1 SV=1
tr|A8MUS3|A8MUS3_HUMAN	66.99	11	8012200	2	2	2	21916	60S ribosomal protein L23a OS=Homo sapiens OX=9606 GN=RPL23A PE=1 SV=1
sp|O75396|SC22B_HUMAN	66.89	16	4487600	3	3	4	24593	Vesicle-trafficking protein SEC22b OS=Homo sapiens OX=9606 GN=SEC22B PE=1 SV=4
tr|A0A087X1A9|A0A087X1A9_HUMAN	66.89	33	2615400	2	2	3	8782	Vesicle-trafficking protein SEC22b (Fragment) OS=Homo sapiens OX=9606 GN=SEC22B PE=1 SV=1
sp|A6NHT5|HMX3_HUMAN	66.84	4	6816900	1	1	2	37825	Homeobox protein HMX3 OS=Homo sapiens OX=9606 GN=HMX3 PE=1 SV=1
tr|A0A087WU43|A0A087WU43_HUMAN	66.41	5	742750	2	2	2	71284	Cadherin-1 OS=Homo sapiens OX=9606 GN=CDH1 PE=1 SV=1
tr|A0A087WX17|A0A087WX17_HUMAN	66.41	5	742750	2	2	2	71370	Cadherin-1 OS=Homo sapiens OX=9606 GN=CDH1 PE=1 SV=1
sp|P12830|CADH1_HUMAN	66.41	3	742750	2	2	2	97456	Cadherin-1 OS=Homo sapiens OX=9606 GN=CDH1 PE=1 SV=3
tr|A0A087WXI5|A0A087WXI5_HUMAN	66.41	3	742750	2	2	2	100027	Cadherin-1 OS=Homo sapiens OX=9606 GN=CDH1 PE=1 SV=1
tr|C9JA28|C9JA28_HUMAN	66.34	8	2581600	1	1	1	20161	Translocon-associated protein subunit gamma OS=Homo sapiens OX=9606 GN=SSR3 PE=1 SV=1
sp|Q9UNL2|SSRG_HUMAN	66.34	8	2581600	1	1	1	21080	Translocon-associated protein subunit gamma OS=Homo sapiens OX=9606 GN=SSR3 PE=1 SV=1
sp|P28066|PSA5_HUMAN	65.95	16	2114400	3	3	3	26411	Proteasome subunit alpha type-5 OS=Homo sapiens OX=9606 GN=PSMA5 PE=1 SV=3
sp|Q6NZI2|CAVN1_HUMAN	65.74	6	1080600	2	2	2	43476	Caveolae-associated protein 1 OS=Homo sapiens OX=9606 GN=CAVIN1 PE=1 SV=1
tr|E9PG15|E9PG15_HUMAN	65.72	19	1017400	3	1	4	17048	14-3-3 protein theta (Fragment) OS=Homo sapiens OX=9606 GN=YWHAQ PE=1 SV=1
sp|P27348|1433T_HUMAN	65.72	12	1017400	3	1	4	27764	14-3-3 protein theta OS=Homo sapiens OX=9606 GN=YWHAQ PE=1 SV=1
sp|P08754|GNAI3_HUMAN	65.71	7	503920	2	1	2	40532	Guanine nucleotide-binding protein G(k) subunit alpha OS=Homo sapiens OX=9606 GN=GNAI3 PE=1 SV=3
sp|P20930|FILA_HUMAN	65.61	1	2168900	2	2	2	435180	Filaggrin OS=Homo sapiens OX=9606 GN=FLG PE=1 SV=3
sp|P62273|RS29_HUMAN	65.57	34	6320200	2	2	2	6677	40S ribosomal protein S29 OS=Homo sapiens OX=9606 GN=RPS29 PE=1 SV=2
sp|O94906|PRP6_HUMAN	65.44	3	388950	3	3	3	106925	Pre-mRNA-processing factor 6 OS=Homo sapiens OX=9606 GN=PRPF6 PE=1 SV=1
tr|J3KTA4|J3KTA4_HUMAN	65.41	5	689970	3	3	3	69087	Probable ATP-dependent RNA helicase DDX5 OS=Homo sapiens OX=9606 GN=DDX5 PE=1 SV=1
sp|P17844|DDX5_HUMAN	65.41	5	689970	3	3	3	69148	Probable ATP-dependent RNA helicase DDX5 OS=Homo sapiens OX=9606 GN=DDX5 PE=1 SV=1
tr|D6REL8|D6REL8_HUMAN	65.34	6	5758700	2	2	2	31180	Fibrinogen beta chain OS=Homo sapiens OX=9606 GN=FGB PE=1 SV=1
sp|P02675|FIBB_HUMAN	65.34	3	5758700	2	2	2	55928	Fibrinogen beta chain OS=Homo sapiens OX=9606 GN=FGB PE=1 SV=2
sp|Q9Y5A9|YTHD2_HUMAN	64.89	4	1173700	2	2	2	62334	YTH domain-containing family protein 2 OS=Homo sapiens OX=9606 GN=YTHDF2 PE=1 SV=2
tr|A0A3B3IRK6|A0A3B3IRK6_HUMAN	64.73	4	443010	2	2	2	78582	Mannosyl-oligosaccharide glucosidase (Fragment) OS=Homo sapiens OX=9606 GN=MOGS PE=1 SV=1
sp|Q13724|MOGS_HUMAN	64.73	3	443010	2	2	2	91918	Mannosyl-oligosaccharide glucosidase OS=Homo sapiens OX=9606 GN=MOGS PE=1 SV=5
tr|A2A2V1|A2A2V1_HUMAN	63.65	5	0	1	1	1	27279	Major prion protein (Fragment) OS=Homo sapiens OX=9606 GN=PRNP PE=1 SV=1
sp|P04156|PRIO_HUMAN	63.65	5	0	1	1	1	27661	Major prion protein OS=Homo sapiens OX=9606 GN=PRNP PE=1 SV=1
tr|H0YFI1|H0YFI1_HUMAN	63.46	16	667510	1	1	1	8716	Ragulator complex protein LAMTOR1 (Fragment) OS=Homo sapiens OX=9606 GN=LAMTOR1 PE=1 SV=1
tr|F5H479|F5H479_HUMAN	63.46	13	667510	1	1	1	11076	Ragulator complex protein LAMTOR1 OS=Homo sapiens OX=9606 GN=LAMTOR1 PE=1 SV=1
tr|F5GX19|F5GX19_HUMAN	63.46	9	667510	1	1	1	15687	Ragulator complex protein LAMTOR1 OS=Homo sapiens OX=9606 GN=LAMTOR1 PE=1 SV=1
tr|F5H3Y3|F5H3Y3_HUMAN	63.46	8	667510	1	1	1	17521	Ragulator complex protein LAMTOR1 OS=Homo sapiens OX=9606 GN=LAMTOR1 PE=1 SV=1
sp|Q6IAA8|LTOR1_HUMAN	63.46	8	667510	1	1	1	17745	Ragulator complex protein LAMTOR1 OS=Homo sapiens OX=9606 GN=LAMTOR1 PE=1 SV=2
sp|P12882|MYH1_HUMAN	63.37	2	922560	2	1	2	223143	Myosin-1 OS=Homo sapiens OX=9606 GN=MYH1 PE=1 SV=3
sp|O00483|NDUA4_HUMAN	63.26	22	9065000	2	2	4	9370	Cytochrome c oxidase subunit NDUFA4 OS=Homo sapiens OX=9606 GN=NDUFA4 PE=1 SV=1
tr|J3QR09|J3QR09_HUMAN	63.17	13	3348400	2	2	2	23135	Ribosomal protein L19 OS=Homo sapiens OX=9606 GN=RPL19 PE=1 SV=1
tr|J3KTE4|J3KTE4_HUMAN	63.17	13	3348400	2	2	2	23248	Ribosomal protein L19 OS=Homo sapiens OX=9606 GN=RPL19 PE=1 SV=1
sp|P84098|RL19_HUMAN	63.17	13	3348400	2	2	2	23466	60S ribosomal protein L19 OS=Homo sapiens OX=9606 GN=RPL19 PE=1 SV=1
sp|Q8NE86|MCU_HUMAN	63.08	3	261030	1	1	1	39867	Calcium uniporter protein mitochondrial OS=Homo sapiens OX=9606 GN=MCU PE=1 SV=1
sp|O75306|NDUS2_HUMAN	62.56	10	3092000	5	5	5	52546	NADH dehydrogenase [ubiquinone] iron-sulfur protein 2 mitochondrial OS=Homo sapiens OX=9606 GN=NDUFS2 PE=1 SV=2
sp|P49207|RL34_HUMAN	62.41	28	11201000	4	4	4	13293	60S ribosomal protein L34 OS=Homo sapiens OX=9606 GN=RPL34 PE=1 SV=3
tr|E9PDQ8|E9PDQ8_HUMAN	62.26	8	8464500	3	3	3	41438	Succinate--CoA ligase [GDP-forming] subunit beta mitochondrial OS=Homo sapiens OX=9606 GN=SUCLG2 PE=1 SV=1
sp|Q96I99|SUCB2_HUMAN	62.26	7	8464500	3	3	3	46511	Succinate--CoA ligase [GDP-forming] subunit beta mitochondrial OS=Homo sapiens OX=9606 GN=SUCLG2 PE=1 SV=2
sp|Q5JTV8|TOIP1_HUMAN	62.02	2	1267500	1	1	1	66248	Torsin-1A-interacting protein 1 OS=Homo sapiens OX=9606 GN=TOR1AIP1 PE=1 SV=2
tr|J3KN66|J3KN66_HUMAN	62.02	2	1267500	1	1	1	67822	Torsin-1A-interacting protein 1 OS=Homo sapiens OX=9606 GN=TOR1AIP1 PE=1 SV=1
tr|A0A0A0MSK5|A0A0A0MSK5_HUMAN	62.02	3	1267500	1	1	1	52406	Torsin-1A-interacting protein 1 OS=Homo sapiens OX=9606 GN=TOR1AIP1 PE=1 SV=1
tr|H0Y4R4|H0Y4R4_HUMAN	62.02	4	1267500	1	1	1	33759	Torsin-1A-interacting protein 1 (Fragment) OS=Homo sapiens OX=9606 GN=TOR1AIP1 PE=1 SV=1
sp|P32926|DSG3_HUMAN	61.86	6	2731400	4	4	5	107533	Desmoglein-3 OS=Homo sapiens OX=9606 GN=DSG3 PE=1 SV=2
sp|P61254|RL26_HUMAN	61.72	29	5489000	5	2	6	17258	60S ribosomal protein L26 OS=Homo sapiens OX=9606 GN=RPL26 PE=1 SV=1
tr|J3QRC4|J3QRC4_HUMAN	61.72	19	3519500	3	1	4	15759	60S ribosomal protein L26 (Fragment) OS=Homo sapiens OX=9606 GN=RPL26 PE=4 SV=1
tr|J3QQQ9|J3QQQ9_HUMAN	61.72	23	3519500	3	1	4	12692	Uncharacterized protein OS=Homo sapiens OX=9606 PE=4 SV=1
tr|J3QRI7|J3QRI7_HUMAN	61.72	23	3519500	3	1	4	12630	60S ribosomal protein L26 (Fragment) OS=Homo sapiens OX=9606 GN=RPL26 PE=4 SV=1
tr|J3QQV1|J3QQV1_HUMAN	61.72	23	3519500	3	1	4	12934	60S ribosomal protein L26 OS=Homo sapiens OX=9606 GN=RPL26 PE=4 SV=1
tr|J3KSS0|J3KSS0_HUMAN	61.72	29	3519500	2	1	3	7575	60S ribosomal protein L26 OS=Homo sapiens OX=9606 GN=RPL26 PE=4 SV=1
sp|O14879|IFIT3_HUMAN	61.71	9	2959200	4	4	4	55985	Interferon-induced protein with tetratricopeptide repeats 3 OS=Homo sapiens OX=9606 GN=IFIT3 PE=1 SV=1
sp|P04004|VTNC_HUMAN	61.45	3	1932600	1	1	1	54306	Vitronectin OS=Homo sapiens OX=9606 GN=VTN PE=1 SV=1
tr|H7BY36|H7BY36_HUMAN	61.43	12	1490500	3	3	3	32190	RNA-binding protein EWS (Fragment) OS=Homo sapiens OX=9606 GN=EWSR1 PE=1 SV=1
tr|A0A0D9SFL3|A0A0D9SFL3_HUMAN	61.43	6	1490500	3	3	3	61415	RNA-binding protein EWS OS=Homo sapiens OX=9606 GN=EWSR1 PE=1 SV=1
tr|B0QYK0|B0QYK0_HUMAN	61.43	6	1490500	3	3	3	64929	RNA-binding protein EWS OS=Homo sapiens OX=9606 GN=EWSR1 PE=1 SV=1
tr|C9JGE3|C9JGE3_HUMAN	61.43	6	1490500	3	3	3	65135	EWS RNA-binding protein variant 6 OS=Homo sapiens OX=9606 GN=EWSR1 PE=1 SV=2
sp|Q01844|EWS_HUMAN	61.43	5	1490500	3	3	3	68478	RNA-binding protein EWS OS=Homo sapiens OX=9606 GN=EWSR1 PE=1 SV=1
tr|J3KSP2|J3KSP2_HUMAN	61.17	62	1209500	1	1	1	2559	60S ribosomal protein L38 (Fragment) OS=Homo sapiens OX=9606 GN=RPL38 PE=1 SV=1
tr|J3KT73|J3KT73_HUMAN	61.17	20	1209500	1	1	1	7565	60S ribosomal protein L38 OS=Homo sapiens OX=9606 GN=RPL38 PE=1 SV=1
tr|J3QL01|J3QL01_HUMAN	61.17	19	1209500	1	1	1	7977	60S ribosomal protein L38 OS=Homo sapiens OX=9606 GN=RPL38 PE=1 SV=1
sp|P63173|RL38_HUMAN	61.17	19	1209500	1	1	1	8218	60S ribosomal protein L38 OS=Homo sapiens OX=9606 GN=RPL38 PE=1 SV=2
sp|O00264|PGRC1_HUMAN	60.52	7	450090	1	1	1	21671	Membrane-associated progesterone receptor component 1 OS=Homo sapiens OX=9606 GN=PGRMC1 PE=1 SV=3
tr|K7EJE8|K7EJE8_HUMAN	60.49	6	584280	3	3	3	93297	Lon protease homolog mitochondrial OS=Homo sapiens OX=9606 GN=LONP1 PE=1 SV=1
tr|K7EKE6|K7EKE6_HUMAN	60.49	6	584280	3	3	3	95180	Lon protease homolog mitochondrial OS=Homo sapiens OX=9606 GN=LONP1 PE=1 SV=1
sp|P36776|LONM_HUMAN	60.49	5	584280	3	3	3	106489	Lon protease homolog mitochondrial OS=Homo sapiens OX=9606 GN=LONP1 PE=1 SV=2
tr|A6NLH6|A6NLH6_HUMAN	60.26	15	0	1	1	1	15771	Protein cornichon homolog 4 OS=Homo sapiens OX=9606 GN=CNIH4 PE=1 SV=1
sp|Q9P003|CNIH4_HUMAN	60.26	14	0	1	1	1	16093	Protein cornichon homolog 4 OS=Homo sapiens OX=9606 GN=CNIH4 PE=1 SV=1
tr|A0A0B4J1Z1|A0A0B4J1Z1_HUMAN	60.08	19	3252800	2	2	2	15763	Serine/arginine-rich-splicing factor 7 OS=Homo sapiens OX=9606 GN=SRSF7 PE=1 SV=1
tr|C9JAB2|C9JAB2_HUMAN	60.08	11	3252800	2	2	2	26928	Serine/arginine-rich-splicing factor 7 OS=Homo sapiens OX=9606 GN=SRSF7 PE=1 SV=1
sp|Q16629|SRSF7_HUMAN	60.08	11	3252800	2	2	2	27367	Serine/arginine-rich splicing factor 7 OS=Homo sapiens OX=9606 GN=SRSF7 PE=1 SV=1
tr|E7ENZ3|E7ENZ3_HUMAN	60	9	908810	4	4	4	53849	T-complex protein 1 subunit epsilon OS=Homo sapiens OX=9606 GN=CCT5 PE=1 SV=1
tr|B7ZAR1|B7ZAR1_HUMAN	60	9	908810	4	4	4	55349	T-complex protein 1 subunit epsilon OS=Homo sapiens OX=9606 GN=CCT5 PE=1 SV=1
tr|E9PCA1|E9PCA1_HUMAN	60	8	908810	4	4	4	57144	T-complex protein 1 subunit epsilon OS=Homo sapiens OX=9606 GN=CCT5 PE=1 SV=1
sp|P48643|TCPE_HUMAN	60	8	908810	4	4	4	59671	T-complex protein 1 subunit epsilon OS=Homo sapiens OX=9606 GN=CCT5 PE=1 SV=1
sp|P26639|SYTC_HUMAN	59.88	4	1224800	2	2	2	83435	Threonine--tRNA ligase cytoplasmic OS=Homo sapiens OX=9606 GN=TARS PE=1 SV=3
sp|Q9UGP8|SEC63_HUMAN	59.74	5	925440	3	3	3	87997	Translocation protein SEC63 homolog OS=Homo sapiens OX=9606 GN=SEC63 PE=1 SV=2
tr|E9PPS5|E9PPS5_HUMAN	59.61	24	566150	2	2	2	8276	NADH dehydrogenase [ubiquinone] flavoprotein 1 mitochondrial (Fragment) OS=Homo sapiens OX=9606 GN=NDUFV1 PE=1 SV=1
tr|E9PQP1|E9PQP1_HUMAN	59.61	10	566150	2	2	2	19763	NADH dehydrogenase [ubiquinone] flavoprotein 1 mitochondrial (Fragment) OS=Homo sapiens OX=9606 GN=NDUFV1 PE=1 SV=1
tr|G3V0I5|G3V0I5_HUMAN	59.61	4	566150	2	2	2	50054	NADH dehydrogenase [ubiquinone] flavoprotein 1 mitochondrial OS=Homo sapiens OX=9606 GN=NDUFV1 PE=1 SV=1
sp|P49821|NDUV1_HUMAN	59.61	4	566150	2	2	2	50817	NADH dehydrogenase [ubiquinone] flavoprotein 1 mitochondrial OS=Homo sapiens OX=9606 GN=NDUFV1 PE=1 SV=4
tr|E9PPR0|E9PPR0_HUMAN	59.61	7	476580	1	1	1	15642	NADH dehydrogenase [ubiquinone] flavoprotein 1 mitochondrial (Fragment) OS=Homo sapiens OX=9606 GN=NDUFV1 PE=1 SV=1
tr|E9PMX3|E9PMX3_HUMAN	59.61	6	476580	1	1	1	19663	NADH dehydrogenase [ubiquinone] flavoprotein 1 mitochondrial (Fragment) OS=Homo sapiens OX=9606 GN=NDUFV1 PE=1 SV=1
sp|P11166|GTR1_HUMAN	59.33	4	1314600	2	2	2	54084	Solute carrier family 2 facilitated glucose transporter member 1 OS=Homo sapiens OX=9606 GN=SLC2A1 PE=1 SV=2
tr|A0A075B6F6|A0A075B6F6_HUMAN	59.23	8	1206300	2	2	2	30162	Minor histocompatibility antigen H13 (Fragment) OS=Homo sapiens OX=9606 GN=HM13 PE=1 SV=1
tr|A0A0S2Z6F0|A0A0S2Z6F0_HUMAN	59.23	6	1206300	2	2	2	38068	Histocompatibility 13 isoform 2 OS=Homo sapiens OX=9606 GN=HM13 PE=1 SV=1
tr|A0A3B3IT72|A0A3B3IT72_HUMAN	59.23	6	1206300	2	2	2	40539	Minor histocompatibility antigen H13 OS=Homo sapiens OX=9606 GN=HM13 PE=1 SV=1
sp|Q8TCT9|HM13_HUMAN	59.23	6	1206300	2	2	2	41488	Minor histocompatibility antigen H13 OS=Homo sapiens OX=9606 GN=HM13 PE=1 SV=1
tr|A0A3B3IUB5|A0A3B3IUB5_HUMAN	59.23	5	1206300	2	2	2	46314	Minor histocompatibility antigen H13 OS=Homo sapiens OX=9606 GN=HM13 PE=1 SV=1
sp|Q9H8S9|MOB1A_HUMAN	59.05	8	1110800	2	2	2	25080	MOB kinase activator 1A OS=Homo sapiens OX=9606 GN=MOB1A PE=1 SV=4
sp|Q7L9L4|MOB1B_HUMAN	59.05	8	1110800	2	2	2	25091	MOB kinase activator 1B OS=Homo sapiens OX=9606 GN=MOB1B PE=1 SV=3
tr|B4DXW1|B4DXW1_HUMAN	58.94	7	1095900	3	3	5	42004	Actin-related protein 3 OS=Homo sapiens OX=9606 GN=ACTR3 PE=1 SV=1
sp|P61158|ARP3_HUMAN	58.94	6	1095900	3	3	5	47371	Actin-related protein 3 OS=Homo sapiens OX=9606 GN=ACTR3 PE=1 SV=3
tr|C9JEU5|C9JEU5_HUMAN	58.72	3	1053900	1	1	1	50323	Fibrinogen gamma chain OS=Homo sapiens OX=9606 GN=FGG PE=1 SV=1
sp|P02679|FIBG_HUMAN	58.72	3	1053900	1	1	1	51512	Fibrinogen gamma chain OS=Homo sapiens OX=9606 GN=FGG PE=1 SV=3
tr|C9JC84|C9JC84_HUMAN	58.72	3	1053900	1	1	1	52338	Fibrinogen gamma chain OS=Homo sapiens OX=9606 GN=FGG PE=1 SV=1
tr|C9JPQ9|C9JPQ9_HUMAN	58.72	10	1053900	1	1	1	13546	Fibrinogen gamma chain (Fragment) OS=Homo sapiens OX=9606 GN=FGG PE=1 SV=1
tr|C9JU00|C9JU00_HUMAN	58.72	10	1053900	1	1	1	13988	Fibrinogen gamma chain (Fragment) OS=Homo sapiens OX=9606 GN=FGG PE=1 SV=1
tr|H7BYV1|H7BYV1_HUMAN	58.6	22	443340	1	1	1	8206	Interferon-induced transmembrane protein 2 (Fragment) OS=Homo sapiens OX=9606 GN=IFITM2 PE=4 SV=1
tr|E9PQN9|E9PQN9_HUMAN	58.6	14	443340	1	1	1	12391	Interferon-induced transmembrane protein 2 OS=Homo sapiens OX=9606 GN=IFITM2 PE=1 SV=1
tr|E9PS44|E9PS44_HUMAN	58.6	14	443340	1	1	1	12256	Interferon-induced transmembrane protein 3 OS=Homo sapiens OX=9606 GN=IFITM3 PE=1 SV=1
sp|P13164|IFM1_HUMAN	58.6	13	443340	1	1	1	13964	Interferon-induced transmembrane protein 1 OS=Homo sapiens OX=9606 GN=IFITM1 PE=1 SV=3
sp|Q01629|IFM2_HUMAN	58.6	12	443340	1	1	1	14632	Interferon-induced transmembrane protein 2 OS=Homo sapiens OX=9606 GN=IFITM2 PE=1 SV=2
sp|Q01628|IFM3_HUMAN	58.6	12	443340	1	1	1	14632	Interferon-induced transmembrane protein 3 OS=Homo sapiens OX=9606 GN=IFITM3 PE=1 SV=2
sp|P34897|GLYM_HUMAN	58.54	4	241780	2	2	2	55993	Serine hydroxymethyltransferase mitochondrial OS=Homo sapiens OX=9606 GN=SHMT2 PE=1 SV=3
tr|G3V2Y4|G3V2Y4_HUMAN	58.54	9	241780	2	2	2	25676	Serine hydroxymethyltransferase mitochondrial (Fragment) OS=Homo sapiens OX=9606 GN=SHMT2 PE=1 SV=1
tr|H0YIZ0|H0YIZ0_HUMAN	58.54	8	241780	2	2	2	28826	Serine hydroxymethyltransferase mitochondrial (Fragment) OS=Homo sapiens OX=9606 GN=SHMT2 PE=1 SV=1
tr|C9JD32|C9JD32_HUMAN	58.48	20	5801100	2	2	2	9670	60S ribosomal protein L23 (Fragment) OS=Homo sapiens OX=9606 GN=RPL23 PE=1 SV=1
tr|J3KT29|J3KT29_HUMAN	58.48	15	5801100	2	2	2	13193	60S ribosomal protein L23 OS=Homo sapiens OX=9606 GN=RPL23 PE=1 SV=1
sp|P62829|RL23_HUMAN	58.48	13	5801100	2	2	2	14865	60S ribosomal protein L23 OS=Homo sapiens OX=9606 GN=RPL23 PE=1 SV=1
sp|A0A0B4J1Y9|HV372_HUMAN	58.45	17	24987000	3	2	3	13203	Immunoglobulin heavy variable 3-72 OS=Homo sapiens OX=9606 GN=IGHV3-72 PE=3 SV=1
tr|M0R061|M0R061_HUMAN	58.42	14	728340	1	1	1	16453	Coatomer subunit epsilon OS=Homo sapiens OX=9606 GN=COPE PE=1 SV=1
sp|O14579|COPE_HUMAN	58.42	7	728340	1	1	1	34482	Coatomer subunit epsilon OS=Homo sapiens OX=9606 GN=COPE PE=1 SV=3
tr|M0QXB4|M0QXB4_HUMAN	58.42	6	728340	1	1	1	36924	Coatomer protein complex subunit epsilon isoform CRA_g OS=Homo sapiens OX=9606 GN=COPE PE=1 SV=1
sp|P04196|HRG_HUMAN	58.38	5	3732900	3	3	3	59578	Histidine-rich glycoprotein OS=Homo sapiens OX=9606 GN=HRG PE=1 SV=1
sp|P28331|NDUS1_HUMAN	58.26	6	2231300	4	4	4	79468	NADH-ubiquinone oxidoreductase 75 kDa subunit mitochondrial OS=Homo sapiens OX=9606 GN=NDUFS1 PE=1 SV=3
tr|B4DJ81|B4DJ81_HUMAN	58.26	6	1908100	3	3	3	66922	NADH-ubiquinone oxidoreductase 75 kDa subunit mitochondrial OS=Homo sapiens OX=9606 GN=NDUFS1 PE=1 SV=1
tr|H3BST5|H3BST5_HUMAN	58.11	12	0	2	1	2	23086	Mitochondrial Rho GTPase 2 (Fragment) OS=Homo sapiens OX=9606 GN=RHOT2 PE=1 SV=2
tr|I3L2C6|I3L2C6_HUMAN	58.11	11	0	2	1	2	23704	Mitochondrial Rho GTPase 2 (Fragment) OS=Homo sapiens OX=9606 GN=RHOT2 PE=1 SV=1
sp|Q8IXI1|MIRO2_HUMAN	58.11	4	0	2	1	2	68118	Mitochondrial Rho GTPase 2 OS=Homo sapiens OX=9606 GN=RHOT2 PE=1 SV=2
sp|P41250|GARS_HUMAN	57.95	4	1165200	3	3	3	83166	Glycine--tRNA ligase OS=Homo sapiens OX=9606 GN=GARS PE=1 SV=3
tr|Q5QPM9|Q5QPM9_HUMAN	57.93	8	1120100	1	1	1	20593	Proteasome inhibitor PI31 subunit (Fragment) OS=Homo sapiens OX=9606 GN=PSMF1 PE=1 SV=1
tr|Q5QPM7|Q5QPM7_HUMAN	57.93	6	1120100	1	1	1	28957	Proteasome inhibitor PI31 subunit OS=Homo sapiens OX=9606 GN=PSMF1 PE=1 SV=2
sp|Q92530|PSMF1_HUMAN	57.93	6	1120100	1	1	1	29817	Proteasome inhibitor PI31 subunit OS=Homo sapiens OX=9606 GN=PSMF1 PE=1 SV=2
sp|Q9BXW7|HDHD5_HUMAN	57.53	8	865320	2	2	5	46321	Haloacid dehalogenase-like hydrolase domain-containing 5 OS=Homo sapiens OX=9606 GN=HDHD5 PE=1 SV=1
tr|E7ENQ1|E7ENQ1_HUMAN	57.48	2	653290	2	2	2	132166	Mitogen-activated protein kinase kinase kinase kinase 4 OS=Homo sapiens OX=9606 GN=MAP4K4 PE=1 SV=1
tr|G3XAA2|G3XAA2_HUMAN	57.48	2	653290	2	2	2	133484	Mitogen-activated protein kinase kinase kinase kinase 4 OS=Homo sapiens OX=9606 GN=MAP4K4 PE=1 SV=2
tr|H7C360|H7C360_HUMAN	57.48	2	653290	2	2	2	134171	Mitogen-activated protein kinase kinase kinase kinase 4 (Fragment) OS=Homo sapiens OX=9606 GN=MAP4K4 PE=1 SV=1
tr|G5E948|G5E948_HUMAN	57.48	2	653290	2	2	2	141148	Mitogen-activated protein kinase kinase kinase kinase 4 OS=Homo sapiens OX=9606 GN=MAP4K4 PE=1 SV=2
sp|O95819|M4K4_HUMAN	57.48	2	653290	2	2	2	142101	Mitogen-activated protein kinase kinase kinase kinase 4 OS=Homo sapiens OX=9606 GN=MAP4K4 PE=1 SV=2
tr|E7EN19|E7EN19_HUMAN	57.48	2	653290	2	2	2	144917	Mitogen-activated protein kinase kinase kinase kinase 4 OS=Homo sapiens OX=9606 GN=MAP4K4 PE=1 SV=1
tr|A0A0D9SEY1|A0A0D9SEY1_HUMAN	57.48	2	653290	2	2	2	151083	Mitogen-activated protein kinase kinase kinase kinase 4 isoform CRA_a OS=Homo sapiens OX=9606 GN=MAP4K4 PE=1 SV=1
tr|A0A0G2JKZ1|A0A0G2JKZ1_HUMAN	57.13	4	2408300	2	2	2	47607	Tapasin OS=Homo sapiens OX=9606 GN=TAPBP PE=1 SV=1
sp|O15533|TPSN_HUMAN	57.13	4	2408300	2	2	2	47626	Tapasin OS=Homo sapiens OX=9606 GN=TAPBP PE=1 SV=1
tr|A0A0G2JH37|A0A0G2JH37_HUMAN	57.13	4	2408300	2	2	2	49547	Tapasin OS=Homo sapiens OX=9606 GN=TAPBP PE=1 SV=1
tr|A2AB90|A2AB90_HUMAN	57.13	4	2408300	2	2	2	49492	Tapasin OS=Homo sapiens OX=9606 GN=TAPBP PE=1 SV=1
tr|A0A0A0MSV9|A0A0A0MSV9_HUMAN	57.13	4	2408300	2	2	2	53888	Tapasin OS=Homo sapiens OX=9606 GN=TAPBP PE=1 SV=1
sp|P62258|1433E_HUMAN	57.12	15	286170	4	2	6	29174	14-3-3 protein epsilon OS=Homo sapiens OX=9606 GN=YWHAE PE=1 SV=1
tr|B4DJF2|B4DJF2_HUMAN	57.12	29	0	3	1	4	10949	cDNA FLJ51975 moderately similar to 14-3-3 protein epsilon (14-3-3E) OS=Homo sapiens OX=9606 GN=YWHAE PE=1 SV=1
tr|I3L3T1|I3L3T1_HUMAN	57.12	25	0	3	1	4	12675	14-3-3 protein epsilon OS=Homo sapiens OX=9606 GN=YWHAE PE=1 SV=1
tr|E7ETU9|E7ETU9_HUMAN	56.94	2	1026000	1	1	1	81170	Procollagen-lysine 2-oxoglutarate 5-dioxygenase 2 OS=Homo sapiens OX=9606 GN=PLOD2 PE=1 SV=1
sp|O00469|PLOD2_HUMAN	56.94	2	1026000	1	1	1	84686	Procollagen-lysine 2-oxoglutarate 5-dioxygenase 2 OS=Homo sapiens OX=9606 GN=PLOD2 PE=1 SV=2
tr|Q5STU3|Q5STU3_HUMAN	56.82	6	2369900	3	3	4	48826	Spliceosome RNA helicase DDX39B OS=Homo sapiens OX=9606 GN=DDX39B PE=1 SV=2
sp|O00148|DX39A_HUMAN	56.82	6	2369900	3	3	4	49130	ATP-dependent RNA helicase DDX39A OS=Homo sapiens OX=9606 GN=DDX39A PE=1 SV=2
sp|Q13838|DX39B_HUMAN	56.82	6	2369900	3	3	4	48991	Spliceosome RNA helicase DDX39B OS=Homo sapiens OX=9606 GN=DDX39B PE=1 SV=1
sp|Q9BSJ8|ESYT1_HUMAN	56.79	3	393680	2	2	2	122856	Extended synaptotagmin-1 OS=Homo sapiens OX=9606 GN=ESYT1 PE=1 SV=1
sp|Q92522|H1X_HUMAN	56.57	6	389710	2	2	3	22487	Histone H1x OS=Homo sapiens OX=9606 GN=H1FX PE=1 SV=1
tr|H3BSW3|H3BSW3_HUMAN	56.45	33	1234900	2	2	2	6919	Adenine phosphoribosyltransferase OS=Homo sapiens OX=9606 GN=APRT PE=1 SV=1
tr|H3BQF1|H3BQF1_HUMAN	56.45	14	1234900	2	2	2	16324	Adenine phosphoribosyltransferase (Fragment) OS=Homo sapiens OX=9606 GN=APRT PE=1 SV=8
tr|H3BQZ9|H3BQZ9_HUMAN	56.45	14	1234900	2	2	2	16616	Adenine phosphoribosyltransferase OS=Homo sapiens OX=9606 GN=APRT PE=1 SV=1
tr|H3BQB1|H3BQB1_HUMAN	56.45	13	1234900	2	2	2	17570	Adenine phosphoribosyltransferase (Fragment) OS=Homo sapiens OX=9606 GN=APRT PE=1 SV=1
sp|P07741|APT_HUMAN	56.45	12	1234900	2	2	2	19608	Adenine phosphoribosyltransferase OS=Homo sapiens OX=9606 GN=APRT PE=1 SV=2
tr|F8VYV2|F8VYV2_HUMAN	55.96	10	2597500	1	1	1	15639	60S ribosomal protein L18 OS=Homo sapiens OX=9606 GN=RPL18 PE=1 SV=1
tr|A0A075B7A0|A0A075B7A0_HUMAN	55.96	9	2597500	1	1	1	16198	60S ribosomal protein L18 OS=Homo sapiens OX=9606 GN=RPL18 PE=1 SV=1
tr|G3V203|G3V203_HUMAN	55.96	8	2597500	1	1	1	18756	60S ribosomal protein L18 OS=Homo sapiens OX=9606 GN=RPL18 PE=1 SV=1
tr|H0YHA7|H0YHA7_HUMAN	55.96	8	2597500	1	1	1	18982	60S ribosomal protein L18 (Fragment) OS=Homo sapiens OX=9606 GN=RPL18 PE=1 SV=1
sp|Q07020|RL18_HUMAN	55.96	7	2597500	1	1	1	21634	60S ribosomal protein L18 OS=Homo sapiens OX=9606 GN=RPL18 PE=1 SV=2
tr|J3QQ67|J3QQ67_HUMAN	55.96	7	2597500	1	1	1	21847	60S ribosomal protein L18 (Fragment) OS=Homo sapiens OX=9606 GN=RPL18 PE=1 SV=1
tr|F8VUA6|F8VUA6_HUMAN	55.96	10	2597500	1	1	1	14529	60S ribosomal protein L18 (Fragment) OS=Homo sapiens OX=9606 GN=RPL18 PE=1 SV=1
tr|A0A087X1J7|A0A087X1J7_HUMAN	55.86	8	0	1	1	1	25402	Glutathione peroxidase OS=Homo sapiens OX=9606 GN=GPX3 PE=1 SV=1
sp|P22352|GPX3_HUMAN	55.86	8	0	1	1	1	25552	Glutathione peroxidase 3 OS=Homo sapiens OX=9606 GN=GPX3 PE=1 SV=2
tr|H0YBE4|H0YBE4_HUMAN	55.86	22	0	1	1	1	8852	Glutathione peroxidase 3 (Fragment) OS=Homo sapiens OX=9606 GN=GPX3 PE=1 SV=1
sp|O75947|ATP5H_HUMAN	55.71	11	3766100	2	2	2	18491	ATP synthase subunit d mitochondrial OS=Homo sapiens OX=9606 GN=ATP5PD PE=1 SV=3
tr|F5H608|F5H608_HUMAN	55.71	22	3766100	2	2	2	8915	ATP synthase subunit d mitochondrial OS=Homo sapiens OX=9606 GN=ATP5PD PE=1 SV=2
sp|P54840|GYS2_HUMAN	55.61	2	725350	1	1	1	80989	Glycogen [starch] synthase liver OS=Homo sapiens OX=9606 GN=GYS2 PE=1 SV=2
sp|P13807|GYS1_HUMAN	55.61	1	725350	1	1	1	83786	Glycogen [starch] synthase muscle OS=Homo sapiens OX=9606 GN=GYS1 PE=1 SV=2
sp|Q9BSD7|NTPCR_HUMAN	55.57	14	1377100	2	2	3	20713	Cancer-related nucleoside-triphosphatase OS=Homo sapiens OX=9606 GN=NTPCR PE=1 SV=1
tr|Q5TDF0|Q5TDF0_HUMAN	55.57	11	1377100	2	2	3	25072	Cancer-related nucleoside-triphosphatase OS=Homo sapiens OX=9606 GN=NTPCR PE=1 SV=1
sp|Q9Y394|DHRS7_HUMAN	55.47	8	3091600	3	3	3	38299	Dehydrogenase/reductase SDR family member 7 OS=Homo sapiens OX=9606 GN=DHRS7 PE=1 SV=1
tr|A0A075B6S9|A0A075B6S9_HUMAN	55.47	14	42123000	2	2	3	12688	Immunoglobulin kappa variable 1-37 (non-functional) (Fragment) OS=Homo sapiens OX=9606 GN=IGKV1-37 PE=1 SV=7
sp|P04181|OAT_HUMAN	54.99	10	1301900	3	3	3	48535	Ornithine aminotransferase mitochondrial OS=Homo sapiens OX=9606 GN=OAT PE=1 SV=1
sp|A0A0B4J1U7|HV601_HUMAN	54.8	12	16880000	2	1	6	13481	Immunoglobulin heavy variable 6-1 OS=Homo sapiens OX=9606 GN=IGHV6-1 PE=3 SV=1
sp|P11279|LAMP1_HUMAN	54.73	6	3614500	3	3	3	44882	Lysosome-associated membrane glycoprotein 1 OS=Homo sapiens OX=9606 GN=LAMP1 PE=1 SV=3
sp|Q07812|BAX_HUMAN	54.63	7	1527600	1	1	1	21184	Apoptosis regulator BAX OS=Homo sapiens OX=9606 GN=BAX PE=1 SV=1
tr|K7EK18|K7EK18_HUMAN	54.61	10	1153400	2	2	2	22217	Septin-9 (Fragment) OS=Homo sapiens OX=9606 GN=SEPT9 PE=1 SV=1
tr|K7EL40|K7EL40_HUMAN	54.61	9	1153400	2	2	2	23971	Septin-9 (Fragment) OS=Homo sapiens OX=9606 GN=SEPT9 PE=1 SV=1
sp|Q9UHD8|SEPT9_HUMAN	54.61	3	1153400	2	2	2	65402	Septin-9 OS=Homo sapiens OX=9606 GN=SEPT9 PE=1 SV=2
sp|Q16666|IF16_HUMAN	54.43	2	1146300	2	2	2	88256	Gamma-interferon-inducible protein 16 OS=Homo sapiens OX=9606 GN=IFI16 PE=1 SV=3
tr|B7Z9I1|B7Z9I1_HUMAN	54.27	7	838570	2	2	2	42427	Medium-chain-specific acyl-CoA dehydrogenase mitochondrial OS=Homo sapiens OX=9606 GN=ACADM PE=1 SV=1
sp|P11310|ACADM_HUMAN	54.27	6	838570	2	2	2	46588	Medium-chain specific acyl-CoA dehydrogenase mitochondrial OS=Homo sapiens OX=9606 GN=ACADM PE=1 SV=1
tr|Q5T4U5|Q5T4U5_HUMAN	54.27	6	838570	2	2	2	50271	Acyl-Coenzyme A dehydrogenase C-4 to C-12 straight chain isoform CRA_a OS=Homo sapiens OX=9606 GN=ACADM PE=1 SV=1
tr|K7ELC4|K7ELC4_HUMAN	54.12	30	539860	2	2	2	9099	60S ribosomal protein L22 (Fragment) OS=Homo sapiens OX=9606 GN=RPL22 PE=1 SV=1
tr|K7EMH1|K7EMH1_HUMAN	54.12	27	539860	2	2	2	10422	60S ribosomal protein L22 (Fragment) OS=Homo sapiens OX=9606 GN=RPL22 PE=1 SV=1
tr|K7ERI7|K7ERI7_HUMAN	54.12	25	539860	2	2	2	11169	60S ribosomal protein L22 OS=Homo sapiens OX=9606 GN=RPL22 PE=1 SV=1
sp|P35268|RL22_HUMAN	54.12	19	539860	2	2	2	14787	60S ribosomal protein L22 OS=Homo sapiens OX=9606 GN=RPL22 PE=1 SV=2
tr|K7EJT5|K7EJT5_HUMAN	54.12	51	539860	2	2	2	5083	60S ribosomal protein L22 (Fragment) OS=Homo sapiens OX=9606 GN=RPL22 PE=1 SV=1
tr|K7EP65|K7EP65_HUMAN	54.12	50	539860	2	2	2	5239	60S ribosomal protein L22 (Fragment) OS=Homo sapiens OX=9606 GN=RPL22 PE=1 SV=1
tr|K7EKS7|K7EKS7_HUMAN	54.12	45	539860	2	2	2	5734	Uncharacterized protein OS=Homo sapiens OX=9606 PE=1 SV=1
sp|P49257|LMAN1_HUMAN	54	9	5140700	3	3	3	57549	Protein ERGIC-53 OS=Homo sapiens OX=9606 GN=LMAN1 PE=1 SV=2
sp|P61978|HNRPK_HUMAN	53.99	15	3107500	5	5	5	50976	Heterogeneous nuclear ribonucleoprotein K OS=Homo sapiens OX=9606 GN=HNRNPK PE=1 SV=1
tr|Q5T6W2|Q5T6W2_HUMAN	53.99	16	2075000	4	4	4	41807	Heterogeneous nuclear ribonucleoprotein K (Fragment) OS=Homo sapiens OX=9606 GN=HNRNPK PE=1 SV=1
sp|Q8TC12|RDH11_HUMAN	53.71	4	505050	1	1	1	35386	Retinol dehydrogenase 11 OS=Homo sapiens OX=9606 GN=RDH11 PE=1 SV=2
sp|P05386|RLA1_HUMAN	53.7	14	3503000	1	1	1	11514	60S acidic ribosomal protein P1 OS=Homo sapiens OX=9606 GN=RPLP1 PE=1 SV=1
sp|P40227|TCPZ_HUMAN	53.69	5	895770	2	2	2	58024	T-complex protein 1 subunit zeta OS=Homo sapiens OX=9606 GN=CCT6A PE=1 SV=3
sp|P60903|S10AA_HUMAN	53.64	14	816710	1	1	1	11203	Protein S100-A10 OS=Homo sapiens OX=9606 GN=S100A10 PE=1 SV=2
sp|O43592|XPOT_HUMAN	53.64	2	851710	2	2	2	109964	Exportin-T OS=Homo sapiens OX=9606 GN=XPOT PE=1 SV=2
tr|E5RIT6|E5RIT6_HUMAN	53.16	25	540660	4	1	5	15207	60S ribosomal protein L26-like 1 (Fragment) OS=Homo sapiens OX=9606 GN=RPL26L1 PE=1 SV=1
sp|Q9UNX3|RL26L_HUMAN	53.16	22	540660	4	1	5	17256	60S ribosomal protein L26-like 1 OS=Homo sapiens OX=9606 GN=RPL26L1 PE=1 SV=1
tr|E5RHH1|E5RHH1_HUMAN	53.16	47	540660	2	1	3	4528	60S ribosomal protein L26-like 1 (Fragment) OS=Homo sapiens OX=9606 GN=RPL26L1 PE=1 SV=8
sp|P49748|ACADV_HUMAN	53.09	3	1044600	2	2	2	70390	Very long-chain specific acyl-CoA dehydrogenase mitochondrial OS=Homo sapiens OX=9606 GN=ACADVL PE=1 SV=1
tr|J3QRJ8|J3QRJ8_HUMAN	53.09	11	1044600	2	2	2	21661	Very long-chain-specific acyl-CoA dehydrogenase mitochondrial (Fragment) OS=Homo sapiens OX=9606 GN=ACADVL PE=1 SV=1
tr|G3V1M7|G3V1M7_HUMAN	53.09	8	1044600	2	2	2	30772	Very long-chain-specific acyl-CoA dehydrogenase mitochondrial (Fragment) OS=Homo sapiens OX=9606 GN=ACADVL PE=1 SV=2
tr|E5RJZ1|E5RJZ1_HUMAN	53.06	16	242430	1	1	3	8840	Cytochrome c oxidase subunit 7A-related protein mitochondrial OS=Homo sapiens OX=9606 GN=COX7A2L PE=1 SV=1
tr|H0YBD2|H0YBD2_HUMAN	53.06	14	242430	1	1	3	10415	Cytochrome c oxidase subunit 7A-related protein mitochondrial (Fragment) OS=Homo sapiens OX=9606 GN=COX7A2L PE=1 SV=1
sp|O14548|COX7R_HUMAN	53.06	11	242430	1	1	3	12615	Cytochrome c oxidase subunit 7A-related protein mitochondrial OS=Homo sapiens OX=9606 GN=COX7A2L PE=1 SV=2
tr|A0A087WXC5|A0A087WXC5_HUMAN	52.9	9	2424100	3	3	3	40837	NADH dehydrogenase [ubiquinone] 1 alpha subcomplex subunit 10 mitochondrial OS=Homo sapiens OX=9606 GN=NDUFA10 PE=1 SV=1
sp|O95299|NDUAA_HUMAN	52.9	9	2424100	3	3	3	40751	NADH dehydrogenase [ubiquinone] 1 alpha subcomplex subunit 10 mitochondrial OS=Homo sapiens OX=9606 GN=NDUFA10 PE=1 SV=1
tr|E7ESZ7|E7ESZ7_HUMAN	52.9	8	2424100	3	3	3	44738	NADH dehydrogenase [ubiquinone] 1 alpha subcomplex subunit 10 mitochondrial OS=Homo sapiens OX=9606 GN=NDUFA10 PE=1 SV=1
sp|Q15293|RCN1_HUMAN	52.77	11	2742100	3	3	3	38890	Reticulocalbin-1 OS=Homo sapiens OX=9606 GN=RCN1 PE=1 SV=1
sp|Q9UHB9|SRP68_HUMAN	52.66	6	636380	3	3	3	70730	Signal recognition particle subunit SRP68 OS=Homo sapiens OX=9606 GN=SRP68 PE=1 SV=2
tr|K7EN53|K7EN53_HUMAN	52.66	33	406590	1	1	1	4701	Signal recognition particle subunit SRP68 OS=Homo sapiens OX=9606 GN=SRP68 PE=1 SV=1
tr|K7EQC2|K7EQC2_HUMAN	52.66	29	406590	1	1	1	5742	Signal recognition particle subunit SRP68 OS=Homo sapiens OX=9606 GN=SRP68 PE=1 SV=1
sp|P00846|ATP6_HUMAN	52.5	4	0	1	1	1	24817	ATP synthase subunit a OS=Homo sapiens OX=9606 GN=MT-ATP6 PE=1 SV=1
tr|A0A087WT27|A0A087WT27_HUMAN	52.42	5	1602000	2	2	2	49095	Phosphoacetylglucosamine mutase OS=Homo sapiens OX=9606 GN=PGM3 PE=1 SV=1
tr|J3KN95|J3KN95_HUMAN	52.42	4	1602000	2	2	2	51079	Phosphoacetylglucosamine mutase OS=Homo sapiens OX=9606 GN=PGM3 PE=1 SV=1
sp|O95394|AGM1_HUMAN	52.42	4	1602000	2	2	2	59852	Phosphoacetylglucosamine mutase OS=Homo sapiens OX=9606 GN=PGM3 PE=1 SV=1
sp|Q13200|PSMD2_HUMAN	51.79	3	1213700	2	2	2	100200	26S proteasome non-ATPase regulatory subunit 2 OS=Homo sapiens OX=9606 GN=PSMD2 PE=1 SV=3
sp|P35637|FUS_HUMAN	51.75	3	907990	1	1	1	53426	RNA-binding protein FUS OS=Homo sapiens OX=9606 GN=FUS PE=1 SV=1
tr|H3BPE7|H3BPE7_HUMAN	51.75	3	907990	1	1	1	53497	RNA-binding protein FUS OS=Homo sapiens OX=9606 GN=FUS PE=1 SV=1
tr|H0Y4X3|H0Y4X3_HUMAN	51.6	7	727360	2	2	2	36633	RNA-binding protein 39 (Fragment) OS=Homo sapiens OX=9606 GN=RBM39 PE=1 SV=8
tr|G3XAC6|G3XAC6_HUMAN	51.6	5	727360	2	2	2	48024	RNA-binding protein 39 OS=Homo sapiens OX=9606 GN=RBM39 PE=1 SV=1
sp|Q14498|RBM39_HUMAN	51.6	4	727360	2	2	2	59380	RNA-binding protein 39 OS=Homo sapiens OX=9606 GN=RBM39 PE=1 SV=2
tr|A0A0U1RQH7|A0A0U1RQH7_HUMAN	51.6	9	727360	2	2	2	26699	RNA-binding protein 39 (Fragment) OS=Homo sapiens OX=9606 GN=RBM39 PE=1 SV=1
sp|P46777|RL5_HUMAN	51.49	15	1404500	3	3	3	34363	60S ribosomal protein L5 OS=Homo sapiens OX=9606 GN=RPL5 PE=1 SV=3
tr|Q5T7N0|Q5T7N0_HUMAN	51.49	35	1404500	3	3	3	14114	60S ribosomal protein L5 (Fragment) OS=Homo sapiens OX=9606 GN=RPL5 PE=1 SV=2
tr|A0A2R8Y6J3|A0A2R8Y6J3_HUMAN	51.49	19	1404500	3	3	3	27045	60S ribosomal protein L5 (Fragment) OS=Homo sapiens OX=9606 GN=RPL5 PE=1 SV=1
tr|D6RF44|D6RF44_HUMAN	51.39	20	1560000	2	2	2	12553	Heterogeneous nuclear ribonucleoprotein D0 (Fragment) OS=Homo sapiens OX=9606 GN=HNRNPD PE=1 SV=8
tr|H0YA96|H0YA96_HUMAN	51.39	10	1560000	2	2	2	23930	Heterogeneous nuclear ribonucleoprotein D0 (Fragment) OS=Homo sapiens OX=9606 GN=HNRNPD PE=1 SV=1
tr|D6RAF8|D6RAF8_HUMAN	51.39	10	1560000	2	2	2	23076	Heterogeneous nuclear ribonucleoprotein D0 (Fragment) OS=Homo sapiens OX=9606 GN=HNRNPD PE=1 SV=1
tr|H0Y8G5|H0Y8G5_HUMAN	51.39	8	1560000	2	2	2	29667	Heterogeneous nuclear ribonucleoprotein D0 (Fragment) OS=Homo sapiens OX=9606 GN=HNRNPD PE=1 SV=8
sp|Q14103|HNRPD_HUMAN	51.39	6	1560000	2	2	2	38434	Heterogeneous nuclear ribonucleoprotein D0 OS=Homo sapiens OX=9606 GN=HNRNPD PE=1 SV=1
tr|D6RBQ9|D6RBQ9_HUMAN	51.39	5	452840	1	1	1	15617	Heterogeneous nuclear ribonucleoprotein D0 (Fragment) OS=Homo sapiens OX=9606 GN=HNRNPD PE=1 SV=1
tr|A0A087WUK2|A0A087WUK2_HUMAN	51.39	2	452840	1	1	1	40040	Heterogeneous nuclear ribonucleoprotein D-like isoform CRA_b OS=Homo sapiens OX=9606 GN=HNRNPDL PE=1 SV=1
sp|O14979|HNRDL_HUMAN	51.39	2	452840	1	1	1	46438	Heterogeneous nuclear ribonucleoprotein D-like OS=Homo sapiens OX=9606 GN=HNRNPDL PE=1 SV=3
tr|U3KQP3|U3KQP3_HUMAN	51.38	31	4222100	2	2	2	8717	NADH dehydrogenase [ubiquinone] 1 alpha subcomplex subunit 13 (Fragment) OS=Homo sapiens OX=9606 GN=NDUFA13 PE=4 SV=2
tr|B4DEZ3|B4DEZ3_HUMAN	51.38	19	4222100	2	2	2	14085	NADH dehydrogenase [ubiquinone] 1 alpha subcomplex subunit 13 OS=Homo sapiens OX=9606 GN=NDUFA13 PE=2 SV=1
sp|Q9P0J0|NDUAD_HUMAN	51.38	16	4222100	2	2	2	16698	NADH dehydrogenase [ubiquinone] 1 alpha subcomplex subunit 13 OS=Homo sapiens OX=9606 GN=NDUFA13 PE=1 SV=3
tr|K7EJE1|K7EJE1_HUMAN	51.38	15	4222100	2	2	2	17082	NADH dehydrogenase [ubiquinone] 1 alpha subcomplex subunit 13 OS=Homo sapiens OX=9606 GN=NDUFA13 PE=4 SV=1
tr|E7ENQ6|E7ENQ6_HUMAN	51.38	8	4222100	2	2	2	30095	Uncharacterized protein OS=Homo sapiens OX=9606 PE=4 SV=1
sp|O96008|TOM40_HUMAN	51.3	3	989730	1	1	1	37893	Mitochondrial import receptor subunit TOM40 homolog OS=Homo sapiens OX=9606 GN=TOMM40 PE=1 SV=1
tr|K7EKG4|K7EKG4_HUMAN	51.3	7	989730	1	1	1	18290	Mitochondrial import receptor subunit TOM40 homolog (Fragment) OS=Homo sapiens OX=9606 GN=TOMM40 PE=1 SV=1
tr|K7EJ57|K7EJ57_HUMAN	51.3	5	989730	1	1	1	21915	Mitochondrial import receptor subunit TOM40 homolog (Fragment) OS=Homo sapiens OX=9606 GN=TOMM40 PE=1 SV=8
tr|E9PFZ2|E9PFZ2_HUMAN	51.19	3	3571300	2	2	2	108820	Ceruloplasmin OS=Homo sapiens OX=9606 GN=CP PE=1 SV=1
sp|P00450|CERU_HUMAN	51.19	3	3571300	2	2	2	122205	Ceruloplasmin OS=Homo sapiens OX=9606 GN=CP PE=1 SV=1
sp|P19525|E2AK2_HUMAN	51.08	6	671850	3	3	4	62094	Interferon-induced double-stranded RNA-activated protein kinase OS=Homo sapiens OX=9606 GN=EIF2AK2 PE=1 SV=2
sp|Q15084|PDIA6_HUMAN	51.05	12	2199900	3	3	3	48121	Protein disulfide-isomerase A6 OS=Homo sapiens OX=9606 GN=PDIA6 PE=1 SV=1
tr|F8WAS3|F8WAS3_HUMAN	51	14	857740	1	1	1	7842	NADH dehydrogenase [ubiquinone] 1 alpha subcomplex subunit 5 OS=Homo sapiens OX=9606 GN=NDUFA5 PE=1 SV=1
tr|C9IZN5|C9IZN5_HUMAN	51	11	857740	1	1	1	10694	NADH dehydrogenase [ubiquinone] 1 alpha subcomplex subunit 5 (Fragment) OS=Homo sapiens OX=9606 GN=NDUFA5 PE=1 SV=1
tr|A0A087X1G1|A0A087X1G1_HUMAN	51	10	857740	1	1	1	11965	NADH dehydrogenase [ubiquinone] 1 alpha subcomplex subunit 5 OS=Homo sapiens OX=9606 GN=NDUFA5 PE=1 SV=1
tr|H7BYD0|H7BYD0_HUMAN	51	9	857740	1	1	1	13107	NADH dehydrogenase [ubiquinone] 1 alpha subcomplex subunit 5 (Fragment) OS=Homo sapiens OX=9606 GN=NDUFA5 PE=1 SV=1
sp|Q16718|NDUA5_HUMAN	51	9	857740	1	1	1	13459	NADH dehydrogenase [ubiquinone] 1 alpha subcomplex subunit 5 OS=Homo sapiens OX=9606 GN=NDUFA5 PE=1 SV=3
sp|P16435|NCPR_HUMAN	50.81	3	541280	2	2	2	76690	NADPH--cytochrome P450 reductase OS=Homo sapiens OX=9606 GN=POR PE=1 SV=2
tr|K7EL89|K7EL89_HUMAN	50.8	12	637350	1	1	1	9330	Spermidine synthase (Fragment) OS=Homo sapiens OX=9606 GN=SRM PE=1 SV=1
sp|P19623|SPEE_HUMAN	50.8	3	637350	1	1	1	33825	Spermidine synthase OS=Homo sapiens OX=9606 GN=SRM PE=1 SV=1
sp|Q9HC07|TM165_HUMAN	50.68	9	806170	1	1	2	34906	Transmembrane protein 165 OS=Homo sapiens OX=9606 GN=TMEM165 PE=1 SV=1
tr|H0Y653|H0Y653_HUMAN	50.25	6	434690	1	1	1	24264	Nucleolar protein 56 (Fragment) OS=Homo sapiens OX=9606 GN=NOP56 PE=1 SV=1
tr|H0YDU4|H0YDU4_HUMAN	50.25	5	434690	1	1	1	27757	Nucleolar protein 56 (Fragment) OS=Homo sapiens OX=9606 GN=NOP56 PE=1 SV=1
sp|O00567|NOP56_HUMAN	50.25	2	434690	1	1	1	66050	Nucleolar protein 56 OS=Homo sapiens OX=9606 GN=NOP56 PE=1 SV=4
sp|Q16563|SYPL1_HUMAN	50.1	4	4658000	1	1	1	28565	Synaptophysin-like protein 1 OS=Homo sapiens OX=9606 GN=SYPL1 PE=1 SV=1
tr|A0A0U1RQT9|A0A0U1RQT9_HUMAN	50.1	8	4658000	1	1	1	14967	Synaptophysin-like protein 1 (Fragment) OS=Homo sapiens OX=9606 GN=SYPL1 PE=1 SV=1
tr|C9JYN0|C9JYN0_HUMAN	50.1	5	4658000	1	1	1	24784	Synaptophysin-like protein 1 OS=Homo sapiens OX=9606 GN=SYPL1 PE=1 SV=1
sp|Q9HB40|RISC_HUMAN	50.03	2	659960	1	1	1	50831	Retinoid-inducible serine carboxypeptidase OS=Homo sapiens OX=9606 GN=SCPEP1 PE=1 SV=1
tr|A0A087X2D0|A0A087X2D0_HUMAN	49.38	9	725060	1	1	1	10321	Serine/arginine-rich-splicing factor 3 OS=Homo sapiens OX=9606 GN=SRSF3 PE=1 SV=1
sp|P84103|SRSF3_HUMAN	49.38	5	725060	1	1	1	19330	Serine/arginine-rich splicing factor 3 OS=Homo sapiens OX=9606 GN=SRSF3 PE=1 SV=1
tr|B4E1G1|B4E1G1_HUMAN	49.15	7	1340700	1	1	1	17033	Derlin OS=Homo sapiens OX=9606 GN=DERL1 PE=1 SV=1
tr|E5RGY0|E5RGY0_HUMAN	49.15	7	1340700	1	1	1	17221	Derlin OS=Homo sapiens OX=9606 GN=DERL1 PE=1 SV=1
sp|Q9BUN8|DERL1_HUMAN	49.15	4	1340700	1	1	1	28801	Derlin-1 OS=Homo sapiens OX=9606 GN=DERL1 PE=1 SV=1
tr|F6RFD5|F6RFD5_HUMAN	49.04	8	1036700	1	1	1	15397	Destrin OS=Homo sapiens OX=9606 GN=DSTN PE=1 SV=1
sp|P60981|DEST_HUMAN	49.04	7	1036700	1	1	1	18506	Destrin OS=Homo sapiens OX=9606 GN=DSTN PE=1 SV=3
tr|E7EQB2|E7EQB2_HUMAN	48.93	4	3342400	3	2	3	76626	Lactotransferrin (Fragment) OS=Homo sapiens OX=9606 GN=LTF PE=1 SV=1
tr|E7ER44|E7ER44_HUMAN	48.93	4	3342400	3	2	3	77970	Lactotransferrin OS=Homo sapiens OX=9606 GN=LTF PE=1 SV=1
sp|P02788|TRFL_HUMAN	48.93	4	3342400	3	2	3	78182	Lactotransferrin OS=Homo sapiens OX=9606 GN=LTF PE=1 SV=6
tr|H7C5E8|H7C5E8_HUMAN	48.93	11	0	2	1	2	15847	Serotransferrin (Fragment) OS=Homo sapiens OX=9606 GN=TF PE=1 SV=1
sp|P02787|TRFE_HUMAN	48.93	2	0	2	1	2	77064	Serotransferrin OS=Homo sapiens OX=9606 GN=TF PE=1 SV=3
tr|A0A0A0MSV6|A0A0A0MSV6_HUMAN	48.87	4	50078000	1	1	3	24031	Complement C1q subcomponent subunit B (Fragment) OS=Homo sapiens OX=9606 GN=C1QB PE=1 SV=6
tr|D6R934|D6R934_HUMAN	48.87	4	50078000	1	1	3	26459	Complement C1q subcomponent subunit B OS=Homo sapiens OX=9606 GN=C1QB PE=1 SV=1
sp|P02746|C1QB_HUMAN	48.87	4	50078000	1	1	3	26722	Complement C1q subcomponent subunit B OS=Homo sapiens OX=9606 GN=C1QB PE=1 SV=3
sp|Q13753|LAMC2_HUMAN	48.82	7	4844700	8	7	8	130976	Laminin subunit gamma-2 OS=Homo sapiens OX=9606 GN=LAMC2 PE=1 SV=2
sp|O14744|ANM5_HUMAN	48.65	4	561090	3	3	3	72684	Protein arginine N-methyltransferase 5 OS=Homo sapiens OX=9606 GN=PRMT5 PE=1 SV=4
tr|G3V5L5|G3V5L5_HUMAN	48.65	10	0	2	2	2	19617	Protein arginine N-methyltransferase 5 (Fragment) OS=Homo sapiens OX=9606 GN=PRMT5 PE=1 SV=8
tr|G3V580|G3V580_HUMAN	48.65	9	0	2	2	2	20375	Protein arginine N-methyltransferase 5 (Fragment) OS=Homo sapiens OX=9606 GN=PRMT5 PE=1 SV=1
tr|G3V2L6|G3V2L6_HUMAN	48.65	9	0	2	2	2	20840	Protein arginine N-methyltransferase 5 (Fragment) OS=Homo sapiens OX=9606 GN=PRMT5 PE=1 SV=1
tr|C9JSX3|C9JSX3_HUMAN	48.65	9	0	2	2	2	20590	Protein arginine N-methyltransferase 5 (Fragment) OS=Homo sapiens OX=9606 GN=PRMT5 PE=1 SV=2
sp|O75477|ERLN1_HUMAN	48.54	10	3061700	4	4	4	38926	Erlin-1 OS=Homo sapiens OX=9606 GN=ERLIN1 PE=1 SV=1
tr|B0QZ43|B0QZ43_HUMAN	48.54	12	3061700	4	4	4	31077	Erlin-1 (Fragment) OS=Homo sapiens OX=9606 GN=ERLIN1 PE=1 SV=1
tr|E5RHW4|E5RHW4_HUMAN	48.54	7	2699600	3	3	3	37725	Erlin-2 (Fragment) OS=Homo sapiens OX=9606 GN=ERLIN2 PE=1 SV=1
sp|O94905|ERLN2_HUMAN	48.54	7	2699600	3	3	3	37840	Erlin-2 OS=Homo sapiens OX=9606 GN=ERLIN2 PE=1 SV=1
sp|P30153|2AAA_HUMAN	48.41	5	3520500	2	2	3	65309	Serine/threonine-protein phosphatase 2A 65 kDa regulatory subunit A alpha isoform OS=Homo sapiens OX=9606 GN=PPP2R1A PE=1 SV=4
tr|B3KQV6|B3KQV6_HUMAN	48.41	5	2885000	1	1	2	45604	cDNA FLJ33169 fis clone ADRGL2000384 highly similar to Serine/threonine-protein phosphatase 2A 65 kDa regulatory subunit A alpha isoform OS=Homo sapiens OX=9606 GN=PPP2R1A PE=1 SV=1
tr|E9PH38|E9PH38_HUMAN	48.41	15	2885000	1	1	2	14628	Serine/threonine-protein phosphatase 2A 65 kDa regulatory subunit A alpha isoform (Fragment) OS=Homo sapiens OX=9606 GN=PPP2R1A PE=1 SV=2
sp|P12273|PIP_HUMAN	47.91	7	754950	1	1	1	16572	Prolactin-inducible protein OS=Homo sapiens OX=9606 GN=PIP PE=1 SV=1
sp|P07205|PGK2_HUMAN	47.74	7	1179200	3	2	3	44796	Phosphoglycerate kinase 2 OS=Homo sapiens OX=9606 GN=PGK2 PE=1 SV=3
sp|P00558|PGK1_HUMAN	47.74	5	787030	2	1	2	44615	Phosphoglycerate kinase 1 OS=Homo sapiens OX=9606 GN=PGK1 PE=1 SV=3
sp|A0A075B6K0|LV316_HUMAN	47.58	8	4430500	3	1	4	12466	Immunoglobulin lambda variable 3-16 OS=Homo sapiens OX=9606 GN=IGLV3-16 PE=3 SV=2
sp|P01717|LV325_HUMAN	47.58	8	4430500	3	1	4	12011	Immunoglobulin lambda variable 3-25 OS=Homo sapiens OX=9606 GN=IGLV3-25 PE=1 SV=2
sp|P01718|LV327_HUMAN	47.58	8	4430500	3	1	4	12165	Immunoglobulin lambda variable 3-27 OS=Homo sapiens OX=9606 GN=IGLV3-27 PE=1 SV=2
tr|A0A0D9SFE5|A0A0D9SFE5_HUMAN	47.57	4	927690	1	1	1	37581	Lamin B1 isoform CRA_a OS=Homo sapiens OX=9606 GN=LMNB1 PE=1 SV=1
tr|E9PBF6|E9PBF6_HUMAN	47.57	3	927690	1	1	1	44643	Lamin-B1 OS=Homo sapiens OX=9606 GN=LMNB1 PE=1 SV=1
sp|P20700|LMNB1_HUMAN	47.57	2	927690	1	1	1	66408	Lamin-B1 OS=Homo sapiens OX=9606 GN=LMNB1 PE=1 SV=2
tr|A0A0D9SFY5|A0A0D9SFY5_HUMAN	47.57	7	927690	1	1	1	18459	Lamin-B1 (Fragment) OS=Homo sapiens OX=9606 GN=LMNB1 PE=1 SV=1
tr|I3L162|I3L162_HUMAN	47.54	5	10916000	1	1	1	20164	Chymotrypsin-like protease CTRL-1 (Fragment) OS=Homo sapiens OX=9606 GN=CTRL PE=1 SV=1
tr|I3NI28|I3NI28_HUMAN	47.54	5	10916000	1	1	1	20086	Chymotrypsin-like protease CTRL-1 (Fragment) OS=Homo sapiens OX=9606 GN=CTRL PE=1 SV=1
sp|P40313|CTRL_HUMAN	47.54	4	10916000	1	1	1	28002	Chymotrypsin-like protease CTRL-1 OS=Homo sapiens OX=9606 GN=CTRL PE=2 SV=1
sp|P10301|RRAS_HUMAN	47.4	8	749590	2	1	2	23480	Ras-related protein R-Ras OS=Homo sapiens OX=9606 GN=RRAS PE=1 SV=1
sp|Q9BW60|ELOV1_HUMAN	47.27	4	787480	1	1	1	32663	Elongation of very long chain fatty acids protein 1 OS=Homo sapiens OX=9606 GN=ELOVL1 PE=1 SV=1
sp|Q9HD45|TM9S3_HUMAN	47.07	3	363090	2	2	2	67888	Transmembrane 9 superfamily member 3 OS=Homo sapiens OX=9606 GN=TM9SF3 PE=1 SV=2
tr|E9PKD5|E9PKD5_HUMAN	46.7	8	558760	2	2	2	34614	26S proteasome regulatory subunit 6A (Fragment) OS=Homo sapiens OX=9606 GN=PSMC3 PE=1 SV=2
tr|E9PM69|E9PM69_HUMAN	46.7	6	558760	2	2	2	44324	26S proteasome regulatory subunit 6A OS=Homo sapiens OX=9606 GN=PSMC3 PE=1 SV=1
tr|R4GNH3|R4GNH3_HUMAN	46.7	6	558760	2	2	2	47352	26S proteasome regulatory subunit 6A OS=Homo sapiens OX=9606 GN=PSMC3 PE=1 SV=1
sp|P17980|PRS6A_HUMAN	46.7	5	558760	2	2	2	49204	26S proteasome regulatory subunit 6A OS=Homo sapiens OX=9606 GN=PSMC3 PE=1 SV=3
tr|F8W651|F8W651_HUMAN	46.63	19	971310	1	1	1	13393	Coatomer subunit zeta-1 OS=Homo sapiens OX=9606 GN=COPZ1 PE=1 SV=1
sp|P61923|COPZ1_HUMAN	46.63	13	971310	1	1	1	20198	Coatomer subunit zeta-1 OS=Homo sapiens OX=9606 GN=COPZ1 PE=1 SV=1
tr|F8VVA7|F8VVA7_HUMAN	46.63	12	971310	1	1	1	22340	Coatomer subunit zeta-1 OS=Homo sapiens OX=9606 GN=COPZ1 PE=1 SV=1
tr|F8VYK5|F8VYK5_HUMAN	46.63	26	971310	1	1	1	10035	Coatomer subunit zeta-1 OS=Homo sapiens OX=9606 GN=COPZ1 PE=1 SV=1
sp|P12956|XRCC6_HUMAN	46.53	3	580150	2	2	2	69843	X-ray repair cross-complementing protein 6 OS=Homo sapiens OX=9606 GN=XRCC6 PE=1 SV=2
tr|B1AHC9|B1AHC9_HUMAN	46.53	4	580150	2	2	2	64284	X-ray repair cross-complementing protein 6 OS=Homo sapiens OX=9606 GN=XRCC6 PE=1 SV=1
tr|E9PPM8|E9PPM8_HUMAN	46.38	4	921370	1	1	1	30517	Deoxyribose-phosphate aldolase OS=Homo sapiens OX=9606 GN=DERA PE=1 SV=1
sp|Q9Y315|DEOC_HUMAN	46.38	4	921370	1	1	1	35231	Deoxyribose-phosphate aldolase OS=Homo sapiens OX=9606 GN=DERA PE=1 SV=2
tr|G3V158|G3V158_HUMAN	46.38	5	921370	1	1	1	25113	2-deoxyribose-5-phosphate aldolase homolog (C. elegans) isoform CRA_a OS=Homo sapiens OX=9606 GN=DERA PE=1 SV=1
tr|C9JJV6|C9JJV6_HUMAN	46.25	7	401600	1	1	1	15864	Myeloid-associated differentiation marker (Fragment) OS=Homo sapiens OX=9606 GN=MYADM PE=1 SV=8
tr|C9JZL8|C9JZL8_HUMAN	46.25	5	401600	1	1	1	20379	Myeloid-associated differentiation marker (Fragment) OS=Homo sapiens OX=9606 GN=MYADM PE=1 SV=1
tr|C9J5M0|C9J5M0_HUMAN	46.25	4	401600	1	1	1	26240	Myeloid-associated differentiation marker (Fragment) OS=Homo sapiens OX=9606 GN=MYADM PE=1 SV=1
tr|C9JC07|C9JC07_HUMAN	46.25	4	401600	1	1	1	28078	Myeloid-associated differentiation marker (Fragment) OS=Homo sapiens OX=9606 GN=MYADM PE=1 SV=1
sp|Q96S97|MYADM_HUMAN	46.25	3	401600	1	1	1	35274	Myeloid-associated differentiation marker OS=Homo sapiens OX=9606 GN=MYADM PE=1 SV=2
tr|F5H4B6|F5H4B6_HUMAN	46.25	3	715700	2	2	3	67153	Aldehyde dehydrogenase family 16 member A1 OS=Homo sapiens OX=9606 GN=ALDH16A1 PE=1 SV=1
sp|Q8IZ83|A16A1_HUMAN	46.25	3	715700	2	2	3	85127	Aldehyde dehydrogenase family 16 member A1 OS=Homo sapiens OX=9606 GN=ALDH16A1 PE=1 SV=2
tr|J3KT19|J3KT19_HUMAN	46.17	7	214870	1	1	1	23438	Ubiquitin carboxyl-terminal hydrolase 10 (Fragment) OS=Homo sapiens OX=9606 GN=USP10 PE=1 SV=1
sp|Q14694|UBP10_HUMAN	46.17	2	214870	1	1	1	87134	Ubiquitin carboxyl-terminal hydrolase 10 OS=Homo sapiens OX=9606 GN=USP10 PE=1 SV=2
sp|P53985|MOT1_HUMAN	46.08	2	0	1	1	2	53944	Monocarboxylate transporter 1 OS=Homo sapiens OX=9606 GN=SLC16A1 PE=1 SV=3
tr|Q5T8R3|Q5T8R3_HUMAN	46.08	4	0	1	1	2	31689	Monocarboxylate transporter 1 (Fragment) OS=Homo sapiens OX=9606 GN=SLC16A1 PE=1 SV=1
tr|Q5T8R5|Q5T8R5_HUMAN	46.08	3	0	1	1	2	49219	Monocarboxylate transporter 1 (Fragment) OS=Homo sapiens OX=9606 GN=SLC16A1 PE=1 SV=1
tr|J3QLI9|J3QLI9_HUMAN	46.04	17	645560	1	1	1	8393	Small nuclear ribonucleoprotein Sm D1 OS=Homo sapiens OX=9606 GN=SNRPD1 PE=1 SV=1
sp|P62314|SMD1_HUMAN	46.04	11	645560	1	1	1	13282	Small nuclear ribonucleoprotein Sm D1 OS=Homo sapiens OX=9606 GN=SNRPD1 PE=1 SV=1
sp|P26038|MOES_HUMAN	45.84	2	352060	1	1	2	67820	Moesin OS=Homo sapiens OX=9606 GN=MSN PE=1 SV=3
tr|E7EQR4|E7EQR4_HUMAN	45.84	2	352060	1	1	2	69372	Ezrin OS=Homo sapiens OX=9606 GN=EZR PE=1 SV=3
sp|P15311|EZRI_HUMAN	45.84	2	352060	1	1	2	69413	Ezrin OS=Homo sapiens OX=9606 GN=EZR PE=1 SV=4
tr|A0A2R8Y7M3|A0A2R8Y7M3_HUMAN	45.84	2	352060	1	1	2	62931	Radixin OS=Homo sapiens OX=9606 GN=RDX PE=1 SV=1
sp|P35241|RADI_HUMAN	45.84	2	352060	1	1	2	68564	Radixin OS=Homo sapiens OX=9606 GN=RDX PE=1 SV=1
tr|A0A2R8Y5S7|A0A2R8Y5S7_HUMAN	45.84	2	352060	1	1	2	69336	Radixin OS=Homo sapiens OX=9606 GN=RDX PE=1 SV=1
tr|D6RDK6|D6RDK6_HUMAN	45.77	12	857120	2	2	3	19990	OCIA domain-containing protein 1 (Fragment) OS=Homo sapiens OX=9606 GN=OCIAD1 PE=1 SV=1
tr|D6RBN5|D6RBN5_HUMAN	45.77	10	857120	2	2	3	24311	OCIA domain-containing protein 1 OS=Homo sapiens OX=9606 GN=OCIAD1 PE=1 SV=1
sp|Q9NX40|OCAD1_HUMAN	45.77	9	857120	2	2	3	27626	OCIA domain-containing protein 1 OS=Homo sapiens OX=9606 GN=OCIAD1 PE=1 SV=1
sp|P31025|LCN1_HUMAN	45.42	6	0	1	1	1	19250	Lipocalin-1 OS=Homo sapiens OX=9606 GN=LCN1 PE=1 SV=1
sp|Q5VSP4|LC1L1_HUMAN	45.42	7	0	1	1	1	17918	Putative lipocalin 1-like protein 1 OS=Homo sapiens OX=9606 GN=LCN1P1 PE=5 SV=1
tr|I3L1L3|I3L1L3_HUMAN	45.33	3	749330	3	3	3	140250	Myb-binding protein 1A (Fragment) OS=Homo sapiens OX=9606 GN=MYBBP1A PE=1 SV=1
sp|Q9BQG0|MBB1A_HUMAN	45.33	2	749330	3	3	3	148854	Myb-binding protein 1A OS=Homo sapiens OX=9606 GN=MYBBP1A PE=1 SV=2
sp|O15144|ARPC2_HUMAN	45.27	8	517380	2	2	2	34333	Actin-related protein 2/3 complex subunit 2 OS=Homo sapiens OX=9606 GN=ARPC2 PE=1 SV=1
sp|O43747|AP1G1_HUMAN	45.13	2	1207700	2	2	2	91351	AP-1 complex subunit gamma-1 OS=Homo sapiens OX=9606 GN=AP1G1 PE=1 SV=5
sp|Q9NUQ2|PLCE_HUMAN	44.69	3	1246600	1	1	1	42072	1-acyl-sn-glycerol-3-phosphate acyltransferase epsilon OS=Homo sapiens OX=9606 GN=AGPAT5 PE=1 SV=3
sp|Q9Y2X3|NOP58_HUMAN	44.64	2	466970	1	1	1	59578	Nucleolar protein 58 OS=Homo sapiens OX=9606 GN=NOP58 PE=1 SV=1
tr|H7BZ72|H7BZ72_HUMAN	44.64	5	466970	1	1	1	21219	Nucleolar protein 58 (Fragment) OS=Homo sapiens OX=9606 GN=NOP58 PE=1 SV=1
sp|P29034|S10A2_HUMAN	44.28	28	18810000	4	4	4	11117	Protein S100-A2 OS=Homo sapiens OX=9606 GN=S100A2 PE=1 SV=3
sp|P01825|HV459_HUMAN	44.2	14	1201000	2	1	2	12936	Immunoglobulin heavy variable 4-59 OS=Homo sapiens OX=9606 GN=IGHV4-59 PE=1 SV=2
sp|A0A0C4DH41|HV461_HUMAN	44.2	14	1201000	2	1	2	13066	Immunoglobulin heavy variable 4-61 OS=Homo sapiens OX=9606 GN=IGHV4-61 PE=3 SV=1
sp|P06331|HV434_HUMAN	44.2	13	1201000	2	1	2	13815	Immunoglobulin heavy variable 4-34 OS=Homo sapiens OX=9606 GN=IGHV4-34 PE=1 SV=2
sp|A0A075B6R2|HV404_HUMAN	44.2	14	1201000	2	1	2	12848	Immunoglobulin heavy variable 4-4 OS=Homo sapiens OX=9606 GN=IGHV4-4 PE=3 SV=2
sp|P36952|SPB5_HUMAN	44.1	5	838640	2	2	2	42100	Serpin B5 OS=Homo sapiens OX=9606 GN=SERPINB5 PE=1 SV=2
sp|P02774|VTDB_HUMAN	44.05	4	491080	2	2	3	52918	Vitamin D-binding protein OS=Homo sapiens OX=9606 GN=GC PE=1 SV=2
tr|D6RF35|D6RF35_HUMAN	44.05	4	491080	2	2	3	53021	Vitamin D-binding protein OS=Homo sapiens OX=9606 GN=GC PE=1 SV=1
sp|Q9Y2T2|AP3M1_HUMAN	43.99	4	711010	2	2	2	46939	AP-3 complex subunit mu-1 OS=Homo sapiens OX=9606 GN=AP3M1 PE=1 SV=1
sp|Q8N357|S35F6_HUMAN	43.4	3	777270	1	1	1	40214	Solute carrier family 35 member F6 OS=Homo sapiens OX=9606 GN=SLC35F6 PE=1 SV=1
sp|P47929|LEG7_HUMAN	43.22	19	1074400	2	2	2	15075	Galectin-7 OS=Homo sapiens OX=9606 GN=LGALS7 PE=1 SV=2
sp|P09543|CN37_HUMAN	42.94	9	753170	2	2	3	47579	2' 3'-cyclic-nucleotide 3'-phosphodiesterase OS=Homo sapiens OX=9606 GN=CNP PE=1 SV=2
tr|E5RH59|E5RH59_HUMAN	42.76	34	0	1	1	1	5530	Eukaryotic translation initiation factor 3 subunit H OS=Homo sapiens OX=9606 GN=EIF3H PE=1 SV=1
tr|E5RGU4|E5RGU4_HUMAN	42.76	8	0	1	1	1	26201	Eukaryotic translation initiation factor 3 subunit H (Fragment) OS=Homo sapiens OX=9606 GN=EIF3H PE=1 SV=1
tr|A0A087WZK9|A0A087WZK9_HUMAN	42.76	5	0	1	1	1	39590	Eukaryotic translation initiation factor 3 subunit H OS=Homo sapiens OX=9606 GN=EIF3H PE=1 SV=1
sp|O15372|EIF3H_HUMAN	42.76	5	0	1	1	1	39930	Eukaryotic translation initiation factor 3 subunit H OS=Homo sapiens OX=9606 GN=EIF3H PE=1 SV=1
tr|B3KS98|B3KS98_HUMAN	42.76	5	0	1	1	1	41581	Eukaryotic translation initiation factor 3 subunit H OS=Homo sapiens OX=9606 GN=EIF3H PE=1 SV=1
tr|E5RHC7|E5RHC7_HUMAN	42.76	41	0	1	1	1	4319	Eukaryotic translation initiation factor 3 subunit H OS=Homo sapiens OX=9606 GN=EIF3H PE=1 SV=1
tr|E5RFW7|E5RFW7_HUMAN	42.76	20	0	1	1	1	10084	Eukaryotic translation initiation factor 3 subunit H (Fragment) OS=Homo sapiens OX=9606 GN=EIF3H PE=1 SV=1
tr|E5RFH0|E5RFH0_HUMAN	42.76	11	0	1	1	1	18684	Eukaryotic translation initiation factor 3 subunit H (Fragment) OS=Homo sapiens OX=9606 GN=EIF3H PE=1 SV=1
tr|C9JJ47|C9JJ47_HUMAN	41.93	10	1912100	3	3	3	28791	AP-2 complex subunit mu (Fragment) OS=Homo sapiens OX=9606 GN=AP2M1 PE=1 SV=1
tr|A0A087WY71|A0A087WY71_HUMAN	41.93	6	1912100	3	3	3	49527	AP-2 complex subunit mu OS=Homo sapiens OX=9606 GN=AP2M1 PE=1 SV=1
sp|Q96CW1|AP2M1_HUMAN	41.93	6	1912100	3	3	3	49655	AP-2 complex subunit mu OS=Homo sapiens OX=9606 GN=AP2M1 PE=1 SV=2
tr|E9PFW3|E9PFW3_HUMAN	41.93	5	1912100	3	3	3	52304	AP-2 complex subunit mu OS=Homo sapiens OX=9606 GN=AP2M1 PE=1 SV=1
sp|O75223|GGCT_HUMAN	41.89	5	0	1	1	1	21008	Gamma-glutamylcyclotransferase OS=Homo sapiens OX=9606 GN=GGCT PE=1 SV=1
tr|M0QZK8|M0QZK8_HUMAN	41.89	10	0	1	1	1	11578	Uncharacterized protein OS=Homo sapiens OX=9606 PE=4 SV=1
sp|P56385|ATP5I_HUMAN	41.86	14	3680200	1	1	1	7933	ATP synthase subunit e mitochondrial OS=Homo sapiens OX=9606 GN=ATP5ME PE=1 SV=2
sp|P50991|TCPD_HUMAN	41.84	4	1114000	2	2	2	57924	T-complex protein 1 subunit delta OS=Homo sapiens OX=9606 GN=CCT4 PE=1 SV=4
tr|R4GN98|R4GN98_HUMAN	41.69	27	29019000	3	3	4	9681	Protein S100 (Fragment) OS=Homo sapiens OX=9606 GN=S100A6 PE=1 SV=1
sp|P06703|S10A6_HUMAN	41.69	26	29019000	3	3	4	10180	Protein S100-A6 OS=Homo sapiens OX=9606 GN=S100A6 PE=1 SV=1
sp|O95169|NDUB8_HUMAN	41.62	6	578190	1	1	1	21766	NADH dehydrogenase [ubiquinone] 1 beta subcomplex subunit 8 mitochondrial OS=Homo sapiens OX=9606 GN=NDUFB8 PE=1 SV=1
sp|P38117|ETFB_HUMAN	41.54	14	1093300	3	3	3	27844	Electron transfer flavoprotein subunit beta OS=Homo sapiens OX=9606 GN=ETFB PE=1 SV=3
tr|A0A1W2PQL0|A0A1W2PQL0_HUMAN	41.42	3	1183100	2	2	2	58821	Heterogeneous nuclear ribonucleoprotein U (Fragment) OS=Homo sapiens OX=9606 GN=HNRNPU PE=1 SV=1
tr|A0A1W2PP34|A0A1W2PP34_HUMAN	41.42	3	1183100	2	2	2	61052	Heterogeneous nuclear ribonucleoprotein U OS=Homo sapiens OX=9606 GN=HNRNPU PE=1 SV=1
tr|A0A1W2PPL4|A0A1W2PPL4_HUMAN	41.42	3	1183100	2	2	2	61564	Heterogeneous nuclear ribonucleoprotein U OS=Homo sapiens OX=9606 GN=HNRNPU PE=1 SV=1
tr|A0A1W2PPH7|A0A1W2PPH7_HUMAN	41.42	3	1183100	2	2	2	61750	Heterogeneous nuclear ribonucleoprotein U OS=Homo sapiens OX=9606 GN=HNRNPU PE=1 SV=1
tr|Q5RI18|Q5RI18_HUMAN	41.42	2	1183100	2	2	2	67825	Heterogeneous nuclear ribonucleoprotein U OS=Homo sapiens OX=9606 GN=HNRNPU PE=1 SV=9
tr|A0A1W2PP35|A0A1W2PP35_HUMAN	41.42	2	1183100	2	2	2	80649	Heterogeneous nuclear ribonucleoprotein U (Fragment) OS=Homo sapiens OX=9606 GN=HNRNPU PE=1 SV=1
tr|A0A1X7SBS1|A0A1X7SBS1_HUMAN	41.42	2	1183100	2	2	2	81795	Heterogeneous nuclear ribonucleoprotein U OS=Homo sapiens OX=9606 GN=HNRNPU PE=1 SV=1
tr|A0A1W2PPS1|A0A1W2PPS1_HUMAN	41.42	2	1183100	2	2	2	88318	Heterogeneous nuclear ribonucleoprotein U OS=Homo sapiens OX=9606 GN=HNRNPU PE=1 SV=1
sp|Q00839|HNRPU_HUMAN	41.42	2	1183100	2	2	2	90585	Heterogeneous nuclear ribonucleoprotein U OS=Homo sapiens OX=9606 GN=HNRNPU PE=1 SV=6
tr|A0A1W2PRZ7|A0A1W2PRZ7_HUMAN	41.42	5	1183100	2	2	2	34151	Heterogeneous nuclear ribonucleoprotein U (Fragment) OS=Homo sapiens OX=9606 GN=HNRNPU PE=1 SV=1
tr|A0A1W2PQ74|A0A1W2PQ74_HUMAN	41.42	4	1183100	2	2	2	41853	Heterogeneous nuclear ribonucleoprotein U OS=Homo sapiens OX=9606 GN=HNRNPU PE=1 SV=1
tr|A0A0D9SF54|A0A0D9SF54_HUMAN	41.26	2	347890	2	2	2	282835	Spectrin alpha chain non-erythrocytic 1 OS=Homo sapiens OX=9606 GN=SPTAN1 PE=1 SV=1
sp|Q13813|SPTN1_HUMAN	41.26	2	347890	2	2	2	284538	Spectrin alpha chain non-erythrocytic 1 OS=Homo sapiens OX=9606 GN=SPTAN1 PE=1 SV=3
tr|A0A0D9SGF6|A0A0D9SGF6_HUMAN	41.26	2	347890	2	2	2	287604	Spectrin alpha chain non-erythrocytic 1 OS=Homo sapiens OX=9606 GN=SPTAN1 PE=1 SV=1
sp|P42704|LPPRC_HUMAN	41.22	4	3519600	4	4	4	157904	Leucine-rich PPR motif-containing protein mitochondrial OS=Homo sapiens OX=9606 GN=LRPPRC PE=1 SV=3
sp|Q9Y673|ALG5_HUMAN	40.87	4	506450	1	1	1	36946	Dolichyl-phosphate beta-glucosyltransferase OS=Homo sapiens OX=9606 GN=ALG5 PE=1 SV=1
tr|D6RH20|D6RH20_HUMAN	40.77	4	249580	1	1	1	34458	28S ribosomal protein S27 mitochondrial (Fragment) OS=Homo sapiens OX=9606 GN=MRPS27 PE=1 SV=1
tr|G5EA06|G5EA06_HUMAN	40.77	3	249580	1	1	1	41329	28S ribosomal protein S27 mitochondrial OS=Homo sapiens OX=9606 GN=MRPS27 PE=1 SV=1
sp|Q92552|RT27_HUMAN	40.77	3	249580	1	1	1	47611	28S ribosomal protein S27 mitochondrial OS=Homo sapiens OX=9606 GN=MRPS27 PE=1 SV=3
sp|Q14624|ITIH4_HUMAN	40.61	2	1286600	2	2	3	103357	Inter-alpha-trypsin inhibitor heavy chain H4 OS=Homo sapiens OX=9606 GN=ITIH4 PE=1 SV=4
tr|B7ZKJ8|B7ZKJ8_HUMAN	40.61	2	1286600	2	2	3	103881	ITIH4 protein OS=Homo sapiens OX=9606 GN=ITIH4 PE=1 SV=1
tr|H7C0L5|H7C0L5_HUMAN	40.61	3	1286600	2	2	3	80072	Inter-alpha-trypsin inhibitor heavy chain H4 (Fragment) OS=Homo sapiens OX=9606 GN=ITIH4 PE=1 SV=1
sp|Q13347|EIF3I_HUMAN	40.54	4	0	1	1	1	36502	Eukaryotic translation initiation factor 3 subunit I OS=Homo sapiens OX=9606 GN=EIF3I PE=1 SV=1
sp|Q6YHK3|CD109_HUMAN	40.31	3	688390	3	2	3	161688	CD109 antigen OS=Homo sapiens OX=9606 GN=CD109 PE=1 SV=2
tr|H7C2U6|H7C2U6_HUMAN	39.75	8	1189900	2	2	2	25616	Protein NipSnap homolog 1 (Fragment) OS=Homo sapiens OX=9606 GN=NIPSNAP1 PE=1 SV=1
sp|Q9BPW8|NIPS1_HUMAN	39.75	6	1189900	2	2	2	33310	Protein NipSnap homolog 1 OS=Homo sapiens OX=9606 GN=NIPSNAP1 PE=1 SV=1
tr|C9JDV8|C9JDV8_HUMAN	39.75	12	661910	1	1	1	9288	Protein NipSnap homolog 1 (Fragment) OS=Homo sapiens OX=9606 GN=NIPSNAP1 PE=1 SV=7
sp|Q15388|TOM20_HUMAN	39.67	9	1712600	1	1	1	16298	Mitochondrial import receptor subunit TOM20 homolog OS=Homo sapiens OX=9606 GN=TOMM20 PE=1 SV=1
sp|P19338|NUCL_HUMAN	39.58	2	386980	2	2	2	76615	Nucleolin OS=Homo sapiens OX=9606 GN=NCL PE=1 SV=3
sp|P23743|DGKA_HUMAN	39.52	2	1210600	2	2	4	82630	Diacylglycerol kinase alpha OS=Homo sapiens OX=9606 GN=DGKA PE=1 SV=3
tr|G3V4E1|G3V4E1_HUMAN	39.52	1	679800	1	1	3	61407	Diacylglycerol kinase (Fragment) OS=Homo sapiens OX=9606 GN=DGKA PE=1 SV=1
tr|B5MCD5|B5MCD5_HUMAN	39.52	1	679800	1	1	3	89627	Diacylglycerol kinase OS=Homo sapiens OX=9606 GN=DGKB PE=1 SV=1
tr|B5MBY2|B5MBY2_HUMAN	39.52	1	679800	1	1	3	90467	Diacylglycerol kinase OS=Homo sapiens OX=9606 GN=DGKB PE=1 SV=1
sp|Q9Y6T7|DGKB_HUMAN	39.52	1	679800	1	1	3	90595	Diacylglycerol kinase beta OS=Homo sapiens OX=9606 GN=DGKB PE=2 SV=2
sp|Q15006|EMC2_HUMAN	39.49	4	592080	1	1	1	34833	ER membrane protein complex subunit 2 OS=Homo sapiens OX=9606 GN=EMC2 PE=1 SV=1
tr|H0YAS9|H0YAS9_HUMAN	39.49	9	592080	1	1	1	16050	ER membrane protein complex subunit 2 (Fragment) OS=Homo sapiens OX=9606 GN=EMC2 PE=1 SV=1
sp|Q9UL25|RAB21_HUMAN	39.05	12	1122100	2	2	2	24348	Ras-related protein Rab-21 OS=Homo sapiens OX=9606 GN=RAB21 PE=1 SV=3
sp|P13473|LAMP2_HUMAN	39.04	2	0	1	1	1	44961	Lysosome-associated membrane glycoprotein 2 OS=Homo sapiens OX=9606 GN=LAMP2 PE=1 SV=2
tr|H7BXK7|H7BXK7_HUMAN	38.99	13	1612200	2	1	3	21965	Serpin B8 (Fragment) OS=Homo sapiens OX=9606 GN=SERPINB8 PE=1 SV=1
tr|A0A1B0GU38|A0A1B0GU38_HUMAN	38.99	10	1612200	2	1	3	29515	Serpin B8 OS=Homo sapiens OX=9606 GN=SERPINB8 PE=1 SV=1
sp|P50452|SPB8_HUMAN	38.99	7	1612200	2	1	3	42767	Serpin B8 OS=Homo sapiens OX=9606 GN=SERPINB8 PE=1 SV=2
sp|Q15046|SYK_HUMAN	38.93	6	1230000	3	3	4	68048	Lysine--tRNA ligase OS=Homo sapiens OX=9606 GN=KARS PE=1 SV=3
sp|Q99460|PSMD1_HUMAN	38.82	1	181940	1	1	1	105836	26S proteasome non-ATPase regulatory subunit 1 OS=Homo sapiens OX=9606 GN=PSMD1 PE=1 SV=2
tr|A0A087WW66|A0A087WW66_HUMAN	38.82	1	181940	1	1	1	105851	26S proteasome non-ATPase regulatory subunit 1 OS=Homo sapiens OX=9606 GN=PSMD1 PE=1 SV=1
sp|Q13451|FKBP5_HUMAN	38.69	2	1059200	1	1	1	51212	Peptidyl-prolyl cis-trans isomerase FKBP5 OS=Homo sapiens OX=9606 GN=FKBP5 PE=1 SV=2
tr|G3V4W0|G3V4W0_HUMAN	38.63	10	918570	2	2	2	28916	Heterogeneous nuclear ribonucleoproteins C1/C2 (Fragment) OS=Homo sapiens OX=9606 GN=HNRNPC PE=1 SV=1
tr|B4DY09|B4DY09_HUMAN	38.55	6	702400	2	2	2	38910	cDNA FLJ51660 highly similar to Interleukin enhancer-binding factor 2 OS=Homo sapiens OX=9606 GN=ILF2 PE=1 SV=1
sp|Q12905|ILF2_HUMAN	38.55	5	702400	2	2	2	43062	Interleukin enhancer-binding factor 2 OS=Homo sapiens OX=9606 GN=ILF2 PE=1 SV=2
sp|Q9Y3E5|PTH2_HUMAN	38.52	8	1204000	1	1	1	19194	Peptidyl-tRNA hydrolase 2 mitochondrial OS=Homo sapiens OX=9606 GN=PTRH2 PE=1 SV=1
tr|J3KQ48|J3KQ48_HUMAN	38.52	8	1204000	1	1	1	19325	Peptidyl-tRNA hydrolase 2 mitochondrial OS=Homo sapiens OX=9606 GN=PTRH2 PE=1 SV=1
sp|O60884|DNJA2_HUMAN	38.36	4	1677300	2	2	2	45746	DnaJ homolog subfamily A member 2 OS=Homo sapiens OX=9606 GN=DNAJA2 PE=1 SV=1
tr|A0A087WT48|A0A087WT48_HUMAN	38.36	7	1058600	1	1	1	14688	DnaJ homolog subfamily A member 2 (Fragment) OS=Homo sapiens OX=9606 GN=DNAJA2 PE=1 SV=1
sp|A0A075B6I0|LV861_HUMAN	37.95	7	8754300	1	1	7	12814	Immunoglobulin lambda variable 8-61 OS=Homo sapiens OX=9606 GN=IGLV8-61 PE=3 SV=7
sp|P31949|S10AB_HUMAN	37.83	15	2925800	2	2	2	11740	Protein S100-A11 OS=Homo sapiens OX=9606 GN=S100A11 PE=1 SV=2
sp|P10909|CLUS_HUMAN	37.72	2	4144200	1	1	2	52495	Clusterin OS=Homo sapiens OX=9606 GN=CLU PE=1 SV=1
tr|H0YAS8|H0YAS8_HUMAN	37.72	6	4144200	1	1	2	16185	Clusterin (Fragment) OS=Homo sapiens OX=9606 GN=CLU PE=1 SV=1
sp|Q99735|MGST2_HUMAN	37.61	10	1167600	1	1	1	16621	Microsomal glutathione S-transferase 2 OS=Homo sapiens OX=9606 GN=MGST2 PE=1 SV=1
sp|P69849|NOMO3_HUMAN	37.57	1	224460	1	1	1	134133	Nodal modulator 3 OS=Homo sapiens OX=9606 GN=NOMO3 PE=3 SV=2
sp|Q15155|NOMO1_HUMAN	37.57	1	224460	1	1	1	134324	Nodal modulator 1 OS=Homo sapiens OX=9606 GN=NOMO1 PE=1 SV=5
tr|A0A087X117|A0A087X117_HUMAN	37.57	1	224460	1	1	1	139469	Nodal modulator 1 OS=Homo sapiens OX=9606 GN=NOMO1 PE=1 SV=1
tr|J3KN36|J3KN36_HUMAN	37.57	1	224460	1	1	1	139381	Nodal modulator 3 OS=Homo sapiens OX=9606 GN=NOMO3 PE=1 SV=1
tr|A0A0G2JN29|A0A0G2JN29_HUMAN	37.57	1	224460	1	1	1	139541	Nodal modulator 1 OS=Homo sapiens OX=9606 GN=NOMO1 PE=1 SV=1
sp|Q5JPE7|NOMO2_HUMAN	37.57	1	224460	1	1	1	139439	Nodal modulator 2 OS=Homo sapiens OX=9606 GN=NOMO2 PE=1 SV=1
sp|Q01469|FABP5_HUMAN	37.31	7	2533100	1	1	1	15164	Fatty acid-binding protein 5 OS=Homo sapiens OX=9606 GN=FABP5 PE=1 SV=3
sp|Q5T749|KPRP_HUMAN	37.11	2	2217600	1	1	1	64136	Keratinocyte proline-rich protein OS=Homo sapiens OX=9606 GN=KPRP PE=1 SV=1
sp|Q9NRH3|TBG2_HUMAN	37.03	2	1443600	1	1	1	51092	Tubulin gamma-2 chain OS=Homo sapiens OX=9606 GN=TUBG2 PE=2 SV=1
sp|P23258|TBG1_HUMAN	37.03	2	1443600	1	1	1	51170	Tubulin gamma-1 chain OS=Homo sapiens OX=9606 GN=TUBG1 PE=1 SV=2
tr|K7EKE5|K7EKE5_HUMAN	37.03	7	1443600	1	1	1	15173	Tubulin gamma-1 chain OS=Homo sapiens OX=9606 GN=TUBG1 PE=4 SV=1
tr|K7EIS0|K7EIS0_HUMAN	37.03	3	1443600	1	1	1	29587	Tubulin gamma chain (Fragment) OS=Homo sapiens OX=9606 GN=TUBG1 PE=1 SV=1
sp|Q14166|TTL12_HUMAN	37.01	1	296580000	1	1	16	74404	Tubulin--tyrosine ligase-like protein 12 OS=Homo sapiens OX=9606 GN=TTLL12 PE=1 SV=2
sp|Q12906|ILF3_HUMAN	36.57	1	708110	1	1	1	95339	Interleukin enhancer-binding factor 3 OS=Homo sapiens OX=9606 GN=ILF3 PE=1 SV=3
sp|O14966|RAB7L_HUMAN	36.47	5	815110	1	1	1	23155	Ras-related protein Rab-7L1 OS=Homo sapiens OX=9606 GN=RAB29 PE=1 SV=1
sp|P57729|RAB38_HUMAN	36.47	5	815110	1	1	1	23712	Ras-related protein Rab-38 OS=Homo sapiens OX=9606 GN=RAB38 PE=1 SV=1
sp|Q13637|RAB32_HUMAN	36.47	5	815110	1	1	1	24997	Ras-related protein Rab-32 OS=Homo sapiens OX=9606 GN=RAB32 PE=1 SV=3
tr|G3V438|G3V438_HUMAN	36.13	13	2981700	3	3	3	22978	Activator of 90 kDa heat shock protein ATPase homolog 1 (Fragment) OS=Homo sapiens OX=9606 GN=AHSA1 PE=1 SV=1
sp|O95433|AHSA1_HUMAN	36.13	8	2981700	3	3	3	38274	Activator of 90 kDa heat shock protein ATPase homolog 1 OS=Homo sapiens OX=9606 GN=AHSA1 PE=1 SV=1
tr|H0YJU2|H0YJU2_HUMAN	36.13	14	1986500	2	2	2	15013	Activator of 90 kDa heat shock protein ATPase homolog 1 (Fragment) OS=Homo sapiens OX=9606 GN=AHSA1 PE=1 SV=1
sp|P35625|TIMP3_HUMAN	36.08	4	0	1	1	1	24145	Metalloproteinase inhibitor 3 OS=Homo sapiens OX=9606 GN=TIMP3 PE=1 SV=2
sp|Q9UBS4|DJB11_HUMAN	36.05	2	1140200	1	1	1	40514	DnaJ homolog subfamily B member 11 OS=Homo sapiens OX=9606 GN=DNAJB11 PE=1 SV=1
tr|G3V3E1|G3V3E1_HUMAN	36.05	1	1140200	1	1	1	95758	SKI family transcriptional corepressor 1 OS=Homo sapiens OX=9606 GN=SKOR1 PE=1 SV=1
tr|G3V5H7|G3V5H7_HUMAN	36.05	1	1140200	1	1	1	96718	SKI family transcriptional corepressor 1 OS=Homo sapiens OX=9606 GN=SKOR1 PE=1 SV=1
sp|P84550|SKOR1_HUMAN	36.05	1	1140200	1	1	1	99830	SKI family transcriptional corepressor 1 OS=Homo sapiens OX=9606 GN=SKOR1 PE=1 SV=1
sp|P13010|XRCC5_HUMAN	35.88	1	0	1	1	1	82705	X-ray repair cross-complementing protein 5 OS=Homo sapiens OX=9606 GN=XRCC5 PE=1 SV=3
sp|Q13423|NNTM_HUMAN	35.74	1	447140	1	1	1	113895	NAD(P) transhydrogenase mitochondrial OS=Homo sapiens OX=9606 GN=NNT PE=1 SV=3
tr|D6RHU2|D6RHU2_HUMAN	35.74	7	447140	1	1	1	21524	NAD(P) transhydrogenase mitochondrial (Fragment) OS=Homo sapiens OX=9606 GN=NNT PE=1 SV=1
tr|D6RAI5|D6RAI5_HUMAN	35.74	6	447140	1	1	1	23461	NAD(P) transhydrogenase mitochondrial (Fragment) OS=Homo sapiens OX=9606 GN=NNT PE=1 SV=1
sp|P09669|COX6C_HUMAN	35.73	9	2621200	1	1	1	8781	Cytochrome c oxidase subunit 6C OS=Homo sapiens OX=9606 GN=COX6C PE=1 SV=2
sp|O60423|AT8B3_HUMAN	35.36	1	966030	1	1	1	146752	Phospholipid-transporting ATPase IK OS=Homo sapiens OX=9606 GN=ATP8B3 PE=2 SV=4
sp|A0A0B4J2D9|KVD13_HUMAN	35.35	9	7958800	1	1	1	12569	Immunoglobulin kappa variable 1D-13 OS=Homo sapiens OX=9606 GN=IGKV1D-13 PE=3 SV=1
sp|P0DP09|KV113_HUMAN	35.35	9	7958800	1	1	1	12569	Immunoglobulin kappa variable 1-13 OS=Homo sapiens OX=9606 GN=IGKV1-13 PE=3 SV=1
sp|P01602|KV105_HUMAN	35.35	9	7958800	1	1	1	12782	Immunoglobulin kappa variable 1-5 OS=Homo sapiens OX=9606 GN=IGKV1-5 PE=1 SV=2
sp|O43653|PSCA_HUMAN	35.3	9	428470	1	1	1	11959	Prostate stem cell antigen OS=Homo sapiens OX=9606 GN=PSCA PE=1 SV=2
tr|K7EJC1|K7EJC1_HUMAN	35.23	5	813300	1	1	1	19781	26S proteasome non-ATPase regulatory subunit 8 OS=Homo sapiens OX=9606 GN=PSMD8 PE=1 SV=1
tr|K7EJR3|K7EJR3_HUMAN	35.23	3	813300	1	1	1	28065	26S proteasome non-ATPase regulatory subunit 8 (Fragment) OS=Homo sapiens OX=9606 GN=PSMD8 PE=1 SV=8
tr|R4GMR5|R4GMR5_HUMAN	35.23	3	813300	1	1	1	32552	26S proteasome non-ATPase regulatory subunit 8 OS=Homo sapiens OX=9606 GN=PSMD8 PE=1 SV=1
sp|P48556|PSMD8_HUMAN	35.23	2	813300	1	1	1	39612	26S proteasome non-ATPase regulatory subunit 8 OS=Homo sapiens OX=9606 GN=PSMD8 PE=1 SV=2
tr|G3V4T5|G3V4T5_HUMAN	34.91	3	340670	1	1	1	31320	Eukaryotic translation initiation factor 2 subunit 1 (Fragment) OS=Homo sapiens OX=9606 GN=EIF2S1 PE=1 SV=1
sp|P05198|IF2A_HUMAN	34.91	3	340670	1	1	1	36112	Eukaryotic translation initiation factor 2 subunit 1 OS=Homo sapiens OX=9606 GN=EIF2S1 PE=1 SV=3
tr|H0YJS4|H0YJS4_HUMAN	34.91	3	340670	1	1	1	28984	Eukaryotic translation initiation factor 2 subunit 1 (Fragment) OS=Homo sapiens OX=9606 GN=EIF2S1 PE=1 SV=1
sp|P05546|HEP2_HUMAN	34.8	3	2929300	2	2	2	57071	Heparin cofactor 2 OS=Homo sapiens OX=9606 GN=SERPIND1 PE=1 SV=3
sp|P05543|THBG_HUMAN	34.8	2	1746300	1	1	1	46325	Thyroxine-binding globulin OS=Homo sapiens OX=9606 GN=SERPINA7 PE=1 SV=2
sp|P21964|COMT_HUMAN	34.72	4	729550	1	1	2	30037	Catechol O-methyltransferase OS=Homo sapiens OX=9606 GN=COMT PE=1 SV=2
sp|Q13045|FLII_HUMAN	34.59	1	435820	1	1	1	144751	Protein flightless-1 homolog OS=Homo sapiens OX=9606 GN=FLII PE=1 SV=2
sp|Q15654|TRIP6_HUMAN	34.53	3	335580	1	1	1	50288	Thyroid receptor-interacting protein 6 OS=Homo sapiens OX=9606 GN=TRIP6 PE=1 SV=3
sp|P43686|PRS6B_HUMAN	34.28	2	0	1	1	1	47366	26S proteasome regulatory subunit 6B OS=Homo sapiens OX=9606 GN=PSMC4 PE=1 SV=2
sp|O96011|PX11B_HUMAN	34.19	3	962620	1	1	1	28431	Peroxisomal membrane protein 11B OS=Homo sapiens OX=9606 GN=PEX11B PE=1 SV=1
sp|Q01082|SPTB2_HUMAN	34.12	0	591410	1	1	1	274608	Spectrin beta chain non-erythrocytic 1 OS=Homo sapiens OX=9606 GN=SPTBN1 PE=1 SV=2
tr|A0A087WUZ3|A0A087WUZ3_HUMAN	34.12	0	591410	1	1	1	274828	Spectrin beta chain OS=Homo sapiens OX=9606 GN=SPTBN1 PE=1 SV=1
tr|K4DI93|K4DI93_HUMAN	34.06	1	240750	1	1	3	102756	Cullin 4B isoform CRA_e OS=Homo sapiens OX=9606 GN=CUL4B PE=1 SV=1
sp|Q13620|CUL4B_HUMAN	34.06	1	240750	1	1	3	103982	Cullin-4B OS=Homo sapiens OX=9606 GN=CUL4B PE=1 SV=4
sp|Q13619|CUL4A_HUMAN	34.06	1	240750	1	1	3	87680	Cullin-4A OS=Homo sapiens OX=9606 GN=CUL4A PE=1 SV=3
sp|Q8TF42|UBS3B_HUMAN	34.01	1	0	1	1	1	72696	Ubiquitin-associated and SH3 domain-containing protein B OS=Homo sapiens OX=9606 GN=UBASH3B PE=1 SV=2
sp|P63151|2ABA_HUMAN	33.84	3	542270	1	1	3	51692	Serine/threonine-protein phosphatase 2A 55 kDa regulatory subunit B alpha isoform OS=Homo sapiens OX=9606 GN=PPP2R2A PE=1 SV=1
sp|P02452|CO1A1_HUMAN	33.8	1	1509600	1	1	3	138942	Collagen alpha-1(I) chain OS=Homo sapiens OX=9606 GN=COL1A1 PE=1 SV=5
sp|P01834|IGKC_HUMAN	33.71	30	1799100	2	2	2	11765	Immunoglobulin kappa constant OS=Homo sapiens OX=9606 GN=IGKC PE=1 SV=2
sp|Q9UPN3|MACF1_HUMAN	33.2	0	333120	3	1	3	838323	Microtubule-actin cross-linking factor 1 isoforms 1/2/3/5 OS=Homo sapiens OX=9606 GN=MACF1 PE=1 SV=4
tr|H3BPE1|H3BPE1_HUMAN	33.2	0	29797000	4	2	4	856894	Microtubule-actin cross-linking factor 1 isoforms 1/2/3/5 OS=Homo sapiens OX=9606 GN=MACF1 PE=1 SV=1
tr|H3BQK9|H3BQK9_HUMAN	33.2	0	29797000	4	2	4	861093	Microtubule-actin cross-linking factor 1 isoforms 1/2/3/5 OS=Homo sapiens OX=9606 GN=MACF1 PE=1 SV=1
tr|A0A1W2PQD2|A0A1W2PQD2_HUMAN	33.1	2	421870	1	1	1	44603	Ataxin-10 OS=Homo sapiens OX=9606 GN=ATXN10 PE=1 SV=1
sp|Q9UBB4|ATX10_HUMAN	33.1	1	421870	1	1	1	53489	Ataxin-10 OS=Homo sapiens OX=9606 GN=ATXN10 PE=1 SV=1
sp|Q92609|TBCD5_HUMAN	33.07	3	178230	2	2	2	89004	TBC1 domain family member 5 OS=Homo sapiens OX=9606 GN=TBC1D5 PE=1 SV=1
tr|C9J3F6|C9J3F6_HUMAN	33.07	4	178230	2	2	2	67534	TBC1 domain family member 5 OS=Homo sapiens OX=9606 GN=TBC1D5 PE=1 SV=1
sp|Q92973|TNPO1_HUMAN	32.39	4	2810600	3	3	4	102355	Transportin-1 OS=Homo sapiens OX=9606 GN=TNPO1 PE=1 SV=2
tr|E7EW37|E7EW37_HUMAN	32.39	15	281100	2	2	3	15549	Transportin-1 OS=Homo sapiens OX=9606 GN=TNPO1 PE=1 SV=1
sp|Q9NTX5|ECHD1_HUMAN	32.39	7	592900	2	2	2	33698	Ethylmalonyl-CoA decarboxylase OS=Homo sapiens OX=9606 GN=ECHDC1 PE=1 SV=2
tr|A0A075B7D9|A0A075B7D9_HUMAN	32.37	4	711170	1	1	1	48840	TATA-binding protein-associated factor 2N OS=Homo sapiens OX=9606 GN=TAF15 PE=1 SV=1
sp|Q92804|RBP56_HUMAN	32.37	3	711170	1	1	1	61830	TATA-binding protein-associated factor 2N OS=Homo sapiens OX=9606 GN=TAF15 PE=1 SV=1
sp|Q9UGT4|SUSD2_HUMAN	32.22	1	0	1	1	1	90208	Sushi domain-containing protein 2 OS=Homo sapiens OX=9606 GN=SUSD2 PE=1 SV=1
sp|Q99714|HCD2_HUMAN	32.11	8	1364100	2	2	2	26923	3-hydroxyacyl-CoA dehydrogenase type-2 OS=Homo sapiens OX=9606 GN=HSD17B10 PE=1 SV=3
sp|O75844|FACE1_HUMAN	31.79	2	750780	1	1	1	54813	CAAX prenyl protease 1 homolog OS=Homo sapiens OX=9606 GN=ZMPSTE24 PE=1 SV=2
tr|E9PK01|E9PK01_HUMAN	31.37	8	0	2	2	2	28821	Elongation factor 1-delta (Fragment) OS=Homo sapiens OX=9606 GN=EEF1D PE=1 SV=1
sp|P29692|EF1D_HUMAN	31.37	7	0	2	2	2	31122	Elongation factor 1-delta OS=Homo sapiens OX=9606 GN=EEF1D PE=1 SV=5
tr|A0A087X1X7|A0A087X1X7_HUMAN	31.37	3	0	2	2	2	69283	Elongation factor 1-delta OS=Homo sapiens OX=9606 GN=EEF1D PE=1 SV=1
tr|E9PRY8|E9PRY8_HUMAN	31.37	3	0	2	2	2	76570	Elongation factor 1-delta OS=Homo sapiens OX=9606 GN=EEF1D PE=1 SV=1
tr|E9PL71|E9PL71_HUMAN	31.37	6	0	1	1	1	20819	Elongation factor 1-delta (Fragment) OS=Homo sapiens OX=9606 GN=EEF1D PE=1 SV=1
tr|E9PQ49|E9PQ49_HUMAN	31.37	6	0	1	1	1	21824	Elongation factor 1-delta (Fragment) OS=Homo sapiens OX=9606 GN=EEF1D PE=1 SV=8
tr|E9PI39|E9PI39_HUMAN	31.37	6	0	1	1	1	22490	Elongation factor 1-delta (Fragment) OS=Homo sapiens OX=9606 GN=EEF1D PE=1 SV=1
tr|E9PN91|E9PN91_HUMAN	31.37	11	0	1	1	1	11616	Elongation factor 1-delta OS=Homo sapiens OX=9606 GN=EEF1D PE=1 SV=1
tr|E9PMW7|E9PMW7_HUMAN	31.37	9	0	1	1	1	14180	Elongation factor 1-delta OS=Homo sapiens OX=9606 GN=EEF1D PE=1 SV=1
tr|E9PIZ1|E9PIZ1_HUMAN	31.37	9	0	1	1	1	15002	Elongation factor 1-delta (Fragment) OS=Homo sapiens OX=9606 GN=EEF1D PE=1 SV=1
tr|E9PPR1|E9PPR1_HUMAN	31.37	7	0	1	1	1	18157	Elongation factor 1-delta (Fragment) OS=Homo sapiens OX=9606 GN=EEF1D PE=1 SV=1
tr|E9PL12|E9PL12_HUMAN	31.37	7	0	1	1	1	18401	Elongation factor 1-delta (Fragment) OS=Homo sapiens OX=9606 GN=EEF1D PE=1 SV=1
tr|H0YCK7|H0YCK7_HUMAN	31.37	6	0	1	1	1	22955	Elongation factor 1-delta (Fragment) OS=Homo sapiens OX=9606 GN=EEF1D PE=1 SV=1
sp|Q9Y5Y6|ST14_HUMAN	31.27	2	282430	1	1	1	94770	Suppressor of tumorigenicity 14 protein OS=Homo sapiens OX=9606 GN=ST14 PE=1 SV=2
tr|B4DLN1|B4DLN1_HUMAN	31.09	2	287900	1	1	1	48099	cDNA FLJ60124 highly similar to Mitochondrial dicarboxylate carrier OS=Homo sapiens OX=9606 PE=2 SV=1
tr|I3L1E8|I3L1E8_HUMAN	31.09	7	287900	1	1	1	12369	Mitochondrial dicarboxylate carrier (Fragment) OS=Homo sapiens OX=9606 GN=SLC25A10 PE=3 SV=1
sp|Q9UBX3|DIC_HUMAN	31.09	3	287900	1	1	1	31282	Mitochondrial dicarboxylate carrier OS=Homo sapiens OX=9606 GN=SLC25A10 PE=1 SV=2
tr|F6RGN5|F6RGN5_HUMAN	31.09	2	287900	1	1	1	43611	Mitochondrial dicarboxylate carrier OS=Homo sapiens OX=9606 GN=SLC25A10 PE=1 SV=1
tr|C9JGI3|C9JGI3_HUMAN	31.05	3	282470	1	1	1	46087	Thymidine phosphorylase (Fragment) OS=Homo sapiens OX=9606 GN=TYMP PE=1 SV=1
sp|P19971|TYPH_HUMAN	31.05	3	282470	1	1	1	49956	Thymidine phosphorylase OS=Homo sapiens OX=9606 GN=TYMP PE=1 SV=2
tr|E9PNW4|E9PNW4_HUMAN	31.02	7	1509600	1	1	2	11985	Uncharacterized protein OS=Homo sapiens OX=9606 PE=1 SV=1
tr|A0A2U3TZL5|A0A2U3TZL5_HUMAN	31.02	7	1509600	1	1	2	13343	CD59 glycoprotein (Fragment) OS=Homo sapiens OX=9606 GN=CD59 PE=4 SV=1
sp|P13987|CD59_HUMAN	31.02	6	1509600	1	1	2	14177	CD59 glycoprotein OS=Homo sapiens OX=9606 GN=CD59 PE=1 SV=1
tr|D6RDB2|D6RDB2_HUMAN	30.93	8	961500	1	1	1	16424	GTP-binding protein SAR1b OS=Homo sapiens OX=9606 GN=SAR1B PE=1 SV=1
tr|X1WI22|X1WI22_HUMAN	30.93	22	961500	1	1	1	5757	GTP-binding protein SAR1a (Fragment) OS=Homo sapiens OX=9606 GN=SAR1A PE=1 SV=7
tr|D6RAA2|D6RAA2_HUMAN	30.93	11	961500	1	1	1	11535	GTP-binding protein SAR1b (Fragment) OS=Homo sapiens OX=9606 GN=SAR1B PE=1 SV=1
tr|Q5SQT8|Q5SQT8_HUMAN	30.93	9	961500	1	1	1	13662	GTP-binding protein SAR1a OS=Homo sapiens OX=9606 GN=SAR1A PE=1 SV=1
tr|D6RD69|D6RD69_HUMAN	30.93	6	961500	1	1	1	19047	GTP-binding protein SAR1b (Fragment) OS=Homo sapiens OX=9606 GN=SAR1B PE=1 SV=1
sp|Q9NR31|SAR1A_HUMAN	30.93	6	961500	1	1	1	22367	GTP-binding protein SAR1a OS=Homo sapiens OX=9606 GN=SAR1A PE=1 SV=1
sp|Q9Y6B6|SAR1B_HUMAN	30.93	6	961500	1	1	1	22410	GTP-binding protein SAR1b OS=Homo sapiens OX=9606 GN=SAR1B PE=1 SV=1
tr|M0R2N5|M0R2N5_HUMAN	30.89	3	2384300	1	1	2	39967	Very-long-chain enoyl-CoA reductase OS=Homo sapiens OX=9606 GN=TECR PE=1 SV=1
tr|Q5JZ08|Q5JZ08_HUMAN	30.78	1	2060500	1	1	1	91354	Hephaestin (Fragment) OS=Homo sapiens OX=9606 GN=HEPH PE=1 SV=1
tr|E7ES21|E7ES21_HUMAN	30.78	1	2060500	1	1	1	109767	Hephaestin OS=Homo sapiens OX=9606 GN=HEPH PE=1 SV=1
sp|Q9BQS7|HEPH_HUMAN	30.78	1	2060500	1	1	1	130449	Hephaestin OS=Homo sapiens OX=9606 GN=HEPH PE=1 SV=3
tr|A0A0C4DG76|A0A0C4DG76_HUMAN	30.78	1	2060500	1	1	1	130766	Hephaestin isoform CRA_c OS=Homo sapiens OX=9606 GN=HEPH PE=1 SV=1
tr|F5H6U7|F5H6U7_HUMAN	30.77	12	132190	1	1	1	14307	Vesicle transport protein GOT1B OS=Homo sapiens OX=9606 GN=GOLT1B PE=1 SV=1
sp|O76064|RNF8_HUMAN	30.34	2	360160	1	1	1	55518	E3 ubiquitin-protein ligase RNF8 OS=Homo sapiens OX=9606 GN=RNF8 PE=1 SV=1
tr|F8WEW6|F8WEW6_HUMAN	30.34	9	360160	1	1	1	9822	E3 ubiquitin-protein ligase RNF8 OS=Homo sapiens OX=9606 GN=RNF8 PE=1 SV=1
sp|P19827|ITIH1_HUMAN	30.26	1	2252300	1	1	1	101389	Inter-alpha-trypsin inhibitor heavy chain H1 OS=Homo sapiens OX=9606 GN=ITIH1 PE=1 SV=3
sp|P47914|RL29_HUMAN	30.06	5	1482400	1	1	1	17752	60S ribosomal protein L29 OS=Homo sapiens OX=9606 GN=RPL29 PE=1 SV=2
tr|A0A3B3ITT5|A0A3B3ITT5_HUMAN	30.06	5	1482400	1	1	1	18512	60S ribosomal protein L29 OS=Homo sapiens OX=9606 GN=RPL29 PE=1 SV=1
sp|P09874|PARP1_HUMAN	30.02	1	249370	1	1	1	113084	Poly [ADP-ribose] polymerase 1 OS=Homo sapiens OX=9606 GN=PARP1 PE=1 SV=4
sp|Q08188|TGM3_HUMAN	30.01	1	1047400	1	1	1	76632	Protein-glutamine gamma-glutamyltransferase E OS=Homo sapiens OX=9606 GN=TGM3 PE=1 SV=4
tr|J3KPT4|J3KPT4_HUMAN	29.96	3	104630	1	1	1	42692	TraB domain-containing protein OS=Homo sapiens OX=9606 GN=TRABD PE=1 SV=1
sp|O75165|DJC13_HUMAN	29.72	0	84376	1	1	1	254412	DnaJ homolog subfamily C member 13 OS=Homo sapiens OX=9606 GN=DNAJC13 PE=1 SV=5
tr|A0A3B3IRM0|A0A3B3IRM0_HUMAN	29.72	2	84376	1	1	1	70872	DnaJ homolog subfamily C member 13 OS=Homo sapiens OX=9606 GN=DNAJC13 PE=1 SV=1
tr|B1AH77|B1AH77_HUMAN	29.62	17	1219200	2	2	2	16775	Ras-related C3 botulinum toxin substrate 2 OS=Homo sapiens OX=9606 GN=RAC2 PE=1 SV=1
tr|B1AH78|B1AH78_HUMAN	29.62	15	1219200	2	2	2	18502	Ras-related C3 botulinum toxin substrate 2 (Fragment) OS=Homo sapiens OX=9606 GN=RAC2 PE=1 SV=1
tr|B1AH80|B1AH80_HUMAN	29.62	14	1219200	2	2	2	20799	Ras-related C3 botulinum toxin substrate 2 (Rho family small GTP binding protein Rac2) isoform CRA_c OS=Homo sapiens OX=9606 GN=RAC2 PE=1 SV=1
sp|P15153|RAC2_HUMAN	29.62	13	1219200	2	2	2	21429	Ras-related C3 botulinum toxin substrate 2 OS=Homo sapiens OX=9606 GN=RAC2 PE=1 SV=1
tr|J3KSC4|J3KSC4_HUMAN	29.62	8	625550	1	1	1	14831	Ras-related C3 botulinum toxin substrate 3 (Fragment) OS=Homo sapiens OX=9606 GN=RAC3 PE=1 SV=1
tr|J3QLK0|J3QLK0_HUMAN	29.62	7	625550	1	1	1	15412	Ras-related C3 botulinum toxin substrate 3 (Fragment) OS=Homo sapiens OX=9606 GN=RAC3 PE=1 SV=1
sp|P63000|RAC1_HUMAN	29.62	5	625550	1	1	1	21450	Ras-related C3 botulinum toxin substrate 1 OS=Homo sapiens OX=9606 GN=RAC1 PE=1 SV=1
sp|P60763|RAC3_HUMAN	29.62	5	625550	1	1	1	21379	Ras-related C3 botulinum toxin substrate 3 OS=Homo sapiens OX=9606 GN=RAC3 PE=1 SV=1
tr|F8W9J4|F8W9J4_HUMAN	29.44	0	181090000	1	1	3	847987	Dystonin OS=Homo sapiens OX=9606 GN=DST PE=1 SV=1
sp|Q03001|DYST_HUMAN	29.44	0	181090000	1	1	3	860679	Dystonin OS=Homo sapiens OX=9606 GN=DST PE=1 SV=4
tr|E9PHM6|E9PHM6_HUMAN	29.44	0	181090000	1	1	3	629794	Dystonin OS=Homo sapiens OX=9606 GN=DST PE=1 SV=3
tr|F6QMI7|F6QMI7_HUMAN	29.44	0	181090000	1	1	3	633674	Dystonin OS=Homo sapiens OX=9606 GN=DST PE=1 SV=2
tr|Q6P0N6|Q6P0N6_HUMAN	29.44	1	181090000	1	1	3	132290	DST protein OS=Homo sapiens OX=9606 GN=DST PE=1 SV=1
tr|E7ETB9|E7ETB9_HUMAN	29.44	1	181090000	1	1	3	171511	Dystonin (Fragment) OS=Homo sapiens OX=9606 GN=DST PE=1 SV=1
tr|V9GYM8|V9GYM8_HUMAN	29.39	1	519500	1	1	1	116071	Rho guanine nucleotide exchange factor 2 OS=Homo sapiens OX=9606 GN=ARHGEF2 PE=1 SV=1
sp|Q92974|ARHG2_HUMAN	29.39	1	519500	1	1	1	111543	Rho guanine nucleotide exchange factor 2 OS=Homo sapiens OX=9606 GN=ARHGEF2 PE=1 SV=4
sp|Q13325|IFIT5_HUMAN	29.1	4	8114300	2	2	2	55847	Interferon-induced protein with tetratricopeptide repeats 5 OS=Homo sapiens OX=9606 GN=IFIT5 PE=1 SV=1
tr|B1ALA9|B1ALA9_HUMAN	28.99	4	25559	1	1	1	31392	Ribose-phosphate pyrophosphokinase 1 OS=Homo sapiens OX=9606 GN=PRPS1 PE=1 SV=2
tr|H7C457|H7C457_HUMAN	28.95	3	360060	1	1	1	31036	Collagen alpha-1(XVIII) chain (Fragment) OS=Homo sapiens OX=9606 GN=COL18A1 PE=1 SV=1
tr|H7BXV5|H7BXV5_HUMAN	28.95	1	360060	1	1	1	70734	Collagen alpha-1(XVIII) chain (Fragment) OS=Homo sapiens OX=9606 GN=COL18A1 PE=1 SV=1
sp|P39060|COIA1_HUMAN	28.95	1	360060	1	1	1	178187	Collagen alpha-1(XVIII) chain OS=Homo sapiens OX=9606 GN=COL18A1 PE=1 SV=5
tr|A0A3B3IT55|A0A3B3IT55_HUMAN	28.93	1	1021300000	1	1	4	116382	KAT8 regulatory NSL complex subunit 1 OS=Homo sapiens OX=9606 GN=KANSL1 PE=1 SV=1
tr|A0A0G2JNB1|A0A0G2JNB1_HUMAN	28.93	1	1021300000	1	1	4	120853	KAT8 regulatory NSL complex subunit 1 OS=Homo sapiens OX=9606 GN=KANSL1 PE=1 SV=1
tr|A0A0G2JNT7|A0A0G2JNT7_HUMAN	28.93	1	1021300000	1	1	4	120982	KAT8 regulatory NSL complex subunit 1 OS=Homo sapiens OX=9606 GN=KANSL1 PE=1 SV=1
tr|A0A0G2JQF4|A0A0G2JQF4_HUMAN	28.93	1	1021300000	1	1	4	120964	KAT8 regulatory NSL complex subunit 1 OS=Homo sapiens OX=9606 GN=KANSL1 PE=1 SV=1
sp|Q7Z3B3|KANL1_HUMAN	28.93	1	1021300000	1	1	4	121025	KAT8 regulatory NSL complex subunit 1 OS=Homo sapiens OX=9606 GN=KANSL1 PE=1 SV=2
tr|A0A1W2PRB5|A0A1W2PRB5_HUMAN	28.93	1	1021300000	1	1	4	113589	KAT8 regulatory NSL complex subunit 1 OS=Homo sapiens OX=9606 GN=KANSL1 PE=1 SV=1
tr|A0A0G2JQF5|A0A0G2JQF5_HUMAN	28.93	1	1021300000	1	1	4	113587	KAT8 regulatory NSL complex subunit 1 OS=Homo sapiens OX=9606 GN=KANSL1 PE=1 SV=1
tr|A0A0J9YVS1|A0A0J9YVS1_HUMAN	28.93	1	1021300000	1	1	4	113605	KAT8 regulatory NSL complex subunit 1 OS=Homo sapiens OX=9606 GN=KANSL1 PE=1 SV=1
tr|A0A1W2PRR3|A0A1W2PRR3_HUMAN	28.93	1	1021300000	1	1	4	52654	KAT8 regulatory NSL complex subunit 1 (Fragment) OS=Homo sapiens OX=9606 GN=KANSL1 PE=1 SV=1
tr|I3L233|I3L233_HUMAN	28.93	1	1021300000	1	1	4	73501	KAT8 regulatory NSL complex subunit 1 (Fragment) OS=Homo sapiens OX=9606 GN=KANSL1 PE=1 SV=2
tr|A0A1W2PPV8|A0A1W2PPV8_HUMAN	28.93	1	1021300000	1	1	4	98051	KAT8 regulatory NSL complex subunit 1 (Fragment) OS=Homo sapiens OX=9606 GN=KANSL1 PE=1 SV=1
sp|Q92769|HDAC2_HUMAN	28.78	2	282100	1	1	1	55364	Histone deacetylase 2 OS=Homo sapiens OX=9606 GN=HDAC2 PE=1 SV=2
sp|P62834|RAP1A_HUMAN	28.72	18	853560	3	3	3	20987	Ras-related protein Rap-1A OS=Homo sapiens OX=9606 GN=RAP1A PE=1 SV=1
sp|P61224|RAP1B_HUMAN	28.72	18	853560	3	3	3	20825	Ras-related protein Rap-1b OS=Homo sapiens OX=9606 GN=RAP1B PE=1 SV=1
tr|B1AH87|B1AH87_HUMAN	28.65	7	5449000	1	1	1	11896	Putative peripheral benzodiazepine receptor-related protein (Fragment) OS=Homo sapiens OX=9606 GN=TSPO PE=1 SV=1
sp|P30536|TSPO_HUMAN	28.65	5	5449000	1	1	1	18828	Translocator protein OS=Homo sapiens OX=9606 GN=TSPO PE=1 SV=3
sp|Q9NRK6|ABCBA_HUMAN	28.44	4	185570	2	2	2	79148	ATP-binding cassette sub-family B member 10 mitochondrial OS=Homo sapiens OX=9606 GN=ABCB10 PE=1 SV=2
sp|Q14258|TRI25_HUMAN	28.43	6	3700700	3	3	3	70974	E3 ubiquitin/ISG15 ligase TRIM25 OS=Homo sapiens OX=9606 GN=TRIM25 PE=1 SV=2
tr|A0A3B3IUA7|A0A3B3IUA7_HUMAN	28.43	8	3700700	3	3	3	51074	E3 ubiquitin/ISG15 ligase TRIM25 OS=Homo sapiens OX=9606 GN=TRIM25 PE=1 SV=1
sp|Q7Z478|DHX29_HUMAN	28.34	1	3544700	1	1	1	155235	ATP-dependent RNA helicase DHX29 OS=Homo sapiens OX=9606 GN=DHX29 PE=1 SV=2
tr|A0A087WYN9|A0A087WYN9_HUMAN	28.34	1	3544700	1	1	1	155291	ATP-dependent RNA helicase DHX29 OS=Homo sapiens OX=9606 GN=DHX29 PE=1 SV=1
sp|Q92620|PRP16_HUMAN	28.23	1	9601700	1	1	4	140502	Pre-mRNA-splicing factor ATP-dependent RNA helicase PRP16 OS=Homo sapiens OX=9606 GN=DHX38 PE=1 SV=2
tr|J3KSA8|J3KSA8_HUMAN	28.23	4	9601700	1	1	4	21516	Pre-mRNA-splicing factor ATP-dependent RNA helicase PRP16 (Fragment) OS=Homo sapiens OX=9606 GN=DHX38 PE=1 SV=1
tr|H3BMS7|H3BMS7_HUMAN	28.23	4	9601700	1	1	4	21930	Pre-mRNA-splicing factor ATP-dependent RNA helicase PRP16 (Fragment) OS=Homo sapiens OX=9606 GN=DHX38 PE=1 SV=2
tr|R4GN72|R4GN72_HUMAN	28.15	8	437410	2	2	2	31676	V-type proton ATPase subunit d 1 OS=Homo sapiens OX=9606 GN=ATP6V0D1 PE=1 SV=1
sp|Q14134|TRI29_HUMAN	28.05	4	237070	2	2	2	65835	Tripartite motif-containing protein 29 OS=Homo sapiens OX=9606 GN=TRIM29 PE=1 SV=2
tr|E9PRL4|E9PRL4_HUMAN	28.05	2	0	1	1	1	37422	Tripartite motif-containing protein 29 OS=Homo sapiens OX=9606 GN=TRIM29 PE=1 SV=1
sp|P04433|KV311_HUMAN	28.03	8	18233000	1	1	3	12575	Immunoglobulin kappa variable 3-11 OS=Homo sapiens OX=9606 GN=IGKV3-11 PE=1 SV=1
sp|A0A0A0MRZ8|KVD11_HUMAN	28.03	8	18233000	1	1	3	12625	Immunoglobulin kappa variable 3D-11 OS=Homo sapiens OX=9606 GN=IGKV3D-11 PE=3 SV=6
sp|Q07666|KHDR1_HUMAN	27.95	2	613060	1	1	1	48227	KH domain-containing RNA-binding signal transduction-associated protein 1 OS=Homo sapiens OX=9606 GN=KHDRBS1 PE=1 SV=1
sp|Q5VWX1|KHDR2_HUMAN	27.95	3	613060	1	1	1	38927	KH domain-containing RNA-binding signal transduction-associated protein 2 OS=Homo sapiens OX=9606 GN=KHDRBS2 PE=1 SV=1
sp|P07339|CATD_HUMAN	27.78	2	439170	1	1	1	44552	Cathepsin D OS=Homo sapiens OX=9606 GN=CTSD PE=1 SV=1
tr|A0A1B0GU03|A0A1B0GU03_HUMAN	27.78	2	439170	1	1	1	62702	Uncharacterized protein OS=Homo sapiens OX=9606 PE=1 SV=1
sp|P53396|ACLY_HUMAN	27.75	2	469800	2	2	2	120839	ATP-citrate synthase OS=Homo sapiens OX=9606 GN=ACLY PE=1 SV=3
tr|J3KRI4|J3KRI4_HUMAN	27.68	17	632650	2	2	2	17778	Cytoplasmic dynein 1 light intermediate chain 2 (Fragment) OS=Homo sapiens OX=9606 GN=DYNC1LI2 PE=1 SV=1
sp|O43237|DC1L2_HUMAN	27.68	6	632650	2	2	2	54099	Cytoplasmic dynein 1 light intermediate chain 2 OS=Homo sapiens OX=9606 GN=DYNC1LI2 PE=1 SV=1
tr|J3KNV1|J3KNV1_HUMAN	27.58	0	73971	1	1	2	304212	Zinc finger protein 292 OS=Homo sapiens OX=9606 GN=ZNF292 PE=1 SV=1
sp|O60281|ZN292_HUMAN	27.58	0	73971	1	1	2	304815	Zinc finger protein 292 OS=Homo sapiens OX=9606 GN=ZNF292 PE=1 SV=3
tr|F8W6W8|F8W6W8_HUMAN	27.53	1	28753000	1	1	4	142212	Regulating synaptic membrane exocytosis protein 2 (Fragment) OS=Homo sapiens OX=9606 GN=RIMS2 PE=1 SV=1
tr|D6RA03|D6RA03_HUMAN	27.53	1	28753000	1	1	4	155542	Regulating synaptic membrane exocytosis protein 2 OS=Homo sapiens OX=9606 GN=RIMS2 PE=1 SV=1
sp|P09497|CLCB_HUMAN	27.5	11	2113900	3	3	5	25190	Clathrin light chain B OS=Homo sapiens OX=9606 GN=CLTB PE=1 SV=1
sp|O94874|UFL1_HUMAN	27.31	1	616850	1	1	1	89595	E3 UFM1-protein ligase 1 OS=Homo sapiens OX=9606 GN=UFL1 PE=1 SV=2
tr|E7ESW6|E7ESW6_HUMAN	26.95	1	5950200	2	1	2	337835	WD repeat-containing protein 87 OS=Homo sapiens OX=9606 GN=WDR87 PE=1 SV=2
sp|Q6ZQQ6|WDR87_HUMAN	26.95	1	5950200	2	1	2	333185	WD repeat-containing protein 87 OS=Homo sapiens OX=9606 GN=WDR87 PE=1 SV=3
sp|Q02224|CENPE_HUMAN	26.95	1	215240	3	3	3	316414	Centromere-associated protein E OS=Homo sapiens OX=9606 GN=CENPE PE=1 SV=2
tr|F8WB37|F8WB37_HUMAN	26.87	19	0	1	1	1	7174	Fasciculation and elongation protein zeta-2 OS=Homo sapiens OX=9606 GN=FEZ2 PE=1 SV=1
tr|F8W6C0|F8W6C0_HUMAN	26.87	5	0	1	1	1	28158	Fasciculation and elongation protein zeta-2 (Fragment) OS=Homo sapiens OX=9606 GN=FEZ2 PE=1 SV=8
tr|G3V0F5|G3V0F5_HUMAN	26.87	4	0	1	1	1	34269	Fasciculation and elongation protein zeta 2 (Zygin II) isoform CRA_f OS=Homo sapiens OX=9606 GN=FEZ2 PE=1 SV=1
sp|Q9UHY8|FEZ2_HUMAN	26.87	3	0	1	1	1	39666	Fasciculation and elongation protein zeta-2 OS=Homo sapiens OX=9606 GN=FEZ2 PE=1 SV=2
sp|O75643|U520_HUMAN	26.87	0	302850	1	1	2	244505	U5 small nuclear ribonucleoprotein 200 kDa helicase OS=Homo sapiens OX=9606 GN=SNRNP200 PE=1 SV=2
sp|Q8NFT6|DBF4B_HUMAN	26.65	2	0	1	1	1	67243	Protein DBF4 homolog B OS=Homo sapiens OX=9606 GN=DBF4B PE=1 SV=1
sp|Q6P2Q9|PRP8_HUMAN	26.63	0	117930	1	1	1	273599	Pre-mRNA-processing-splicing factor 8 OS=Homo sapiens OX=9606 GN=PRPF8 PE=1 SV=2
sp|Q9HD20|AT131_HUMAN	26.59	2	118420	2	2	2	132955	Manganese-transporting ATPase 13A1 OS=Homo sapiens OX=9606 GN=ATP13A1 PE=1 SV=2
tr|A0A2R8Y6B6|A0A2R8Y6B6_HUMAN	26.57	8	837920	1	1	1	16914	Glutathione peroxidase 1 OS=Homo sapiens OX=9606 GN=GPX1 PE=1 SV=1
tr|A0A087WUQ6|A0A087WUQ6_HUMAN	26.57	6	837920	1	1	1	21938	Glutathione peroxidase OS=Homo sapiens OX=9606 GN=GPX1 PE=1 SV=1
sp|P07203|GPX1_HUMAN	26.57	6	837920	1	1	1	22088	Glutathione peroxidase 1 OS=Homo sapiens OX=9606 GN=GPX1 PE=1 SV=4
tr|K7ES31|K7ES31_HUMAN	26.48	11	1135100	1	1	1	15875	Eukaryotic translation initiation factor 3 subunit K OS=Homo sapiens OX=9606 GN=EIF3K PE=1 SV=1
tr|K7ERF1|K7ERF1_HUMAN	26.48	8	1135100	1	1	1	22095	Eukaryotic translation initiation factor 3 subunit K OS=Homo sapiens OX=9606 GN=EIF3K PE=1 SV=1
sp|Q9UBQ5|EIF3K_HUMAN	26.48	7	1135100	1	1	1	25060	Eukaryotic translation initiation factor 3 subunit K OS=Homo sapiens OX=9606 GN=EIF3K PE=1 SV=1
tr|C9J3L8|C9J3L8_HUMAN	26.48	3	5151600	1	1	1	29573	Translocon-associated protein subunit alpha OS=Homo sapiens OX=9606 GN=SSR1 PE=1 SV=1
tr|C9J5W0|C9J5W0_HUMAN	26.48	3	5151600	1	1	1	29932	Translocon-associated protein subunit alpha OS=Homo sapiens OX=9606 GN=SSR1 PE=1 SV=1
sp|P43307|SSRA_HUMAN	26.48	3	5151600	1	1	1	32235	Translocon-associated protein subunit alpha OS=Homo sapiens OX=9606 GN=SSR1 PE=1 SV=3
tr|A0A3B3IRT8|A0A3B3IRT8_HUMAN	26.48	3	5151600	1	1	1	32450	Translocon-associated protein subunit alpha OS=Homo sapiens OX=9606 GN=SSR1 PE=1 SV=1
tr|E9PAL7|E9PAL7_HUMAN	26.48	3	5151600	1	1	1	32895	Translocon-associated protein subunit alpha OS=Homo sapiens OX=9606 GN=SSR1 PE=1 SV=1
tr|C9IZQ1|C9IZQ1_HUMAN	26.48	3	5151600	1	1	1	33887	Translocon-associated protein subunit alpha OS=Homo sapiens OX=9606 GN=SSR1 PE=1 SV=1
tr|G5EA09|G5EA09_HUMAN	26.38	3	0	1	1	1	34819	Syndecan binding protein (Syntenin) isoform CRA_a OS=Homo sapiens OX=9606 GN=SDCBP PE=1 SV=1
sp|Q9Y512|SAM50_HUMAN	26.37	2	882530	1	1	1	51976	Sorting and assembly machinery component 50 homolog OS=Homo sapiens OX=9606 GN=SAMM50 PE=1 SV=3
sp|Q9BUL8|PDC10_HUMAN	26.23	5	300760	1	1	1	24702	Programmed cell death protein 10 OS=Homo sapiens OX=9606 GN=PDCD10 PE=1 SV=1
tr|H7C5M9|H7C5M9_HUMAN	26.23	8	300760	1	1	1	14236	Programmed cell death protein 10 (Fragment) OS=Homo sapiens OX=9606 GN=PDCD10 PE=1 SV=1
tr|H0YDT8|H0YDT8_HUMAN	26.14	7	527220	1	1	1	21004	ER membrane protein complex subunit 7 (Fragment) OS=Homo sapiens OX=9606 GN=EMC7 PE=1 SV=1
sp|Q9NPA0|EMC7_HUMAN	26.14	5	527220	1	1	1	26471	ER membrane protein complex subunit 7 OS=Homo sapiens OX=9606 GN=EMC7 PE=1 SV=1
tr|B7Z645|B7Z645_HUMAN	25.93	2	812510	1	1	1	52046	Synaptotagmin binding cytoplasmic RNA interacting protein isoform CRA_b OS=Homo sapiens OX=9606 GN=SYNCRIP PE=1 SV=1
tr|B4DT28|B4DT28_HUMAN	25.93	2	812510	1	1	1	55718	Heterogeneous nuclear ribonucleoprotein R isoform CRA_a OS=Homo sapiens OX=9606 GN=HNRNPR PE=1 SV=1
sp|O60506|HNRPQ_HUMAN	25.93	1	812510	1	1	1	69603	Heterogeneous nuclear ribonucleoprotein Q OS=Homo sapiens OX=9606 GN=SYNCRIP PE=1 SV=2
sp|O43390|HNRPR_HUMAN	25.93	1	812510	1	1	1	70943	Heterogeneous nuclear ribonucleoprotein R OS=Homo sapiens OX=9606 GN=HNRNPR PE=1 SV=1
tr|V9GYZ1|V9GYZ1_HUMAN	25.91	13	613990	1	1	1	16133	Integrin beta (Fragment) OS=Homo sapiens OX=9606 GN=ITGB5 PE=1 SV=1
tr|V9GZ57|V9GZ57_HUMAN	25.91	6	613990	1	1	1	35445	Integrin beta (Fragment) OS=Homo sapiens OX=9606 GN=ITGB5 PE=1 SV=8
sp|P18084|ITB5_HUMAN	25.91	2	613990	1	1	1	88054	Integrin beta-5 OS=Homo sapiens OX=9606 GN=ITGB5 PE=1 SV=1
sp|Q96JJ7|TMX3_HUMAN	25.72	4	0	2	2	2	51872	Protein disulfide-isomerase TMX3 OS=Homo sapiens OX=9606 GN=TMX3 PE=1 SV=2
sp|Q9NRL2|BAZ1A_HUMAN	25.7	1	4846500	1	1	1	178702	Bromodomain adjacent to zinc finger domain protein 1A OS=Homo sapiens OX=9606 GN=BAZ1A PE=1 SV=2
sp|Q9ULV0|MYO5B_HUMAN	25.63	1	117080	2	1	2	213671	Unconventional myosin-Vb OS=Homo sapiens OX=9606 GN=MYO5B PE=1 SV=3
sp|P46063|RECQ1_HUMAN	25.6	1	0	1	1	1	73457	ATP-dependent DNA helicase Q1 OS=Homo sapiens OX=9606 GN=RECQL PE=1 SV=3
sp|Q5VTJ3|KLD7A_HUMAN	25.58	1	0	1	1	1	84479	Kelch domain-containing protein 7A OS=Homo sapiens OX=9606 GN=KLHDC7A PE=1 SV=5
sp|Q96P63|SPB12_HUMAN	25.49	2	275130	1	1	1	46276	Serpin B12 OS=Homo sapiens OX=9606 GN=SERPINB12 PE=1 SV=1
sp|P42285|MTREX_HUMAN	25.26	1	241260	1	1	1	117805	Exosome RNA helicase MTR4 OS=Homo sapiens OX=9606 GN=MTREX PE=1 SV=3
sp|Q16831|UPP1_HUMAN	25.19	2	472200	1	1	1	33934	Uridine phosphorylase 1 OS=Homo sapiens OX=9606 GN=UPP1 PE=1 SV=1
tr|D3YTB1|D3YTB1_HUMAN	25.08	5	5663200	1	1	1	15617	60S ribosomal protein L32 (Fragment) OS=Homo sapiens OX=9606 GN=RPL32 PE=1 SV=1
sp|P62910|RL32_HUMAN	25.08	5	5663200	1	1	1	15860	60S ribosomal protein L32 OS=Homo sapiens OX=9606 GN=RPL32 PE=1 SV=2
tr|F8W727|F8W727_HUMAN	25.08	5	5663200	1	1	1	17962	60S ribosomal protein L32 OS=Homo sapiens OX=9606 GN=RPL32 PE=1 SV=1
tr|R4GN43|R4GN43_HUMAN	25.07	23	551880	2	2	2	8510	NADH dehydrogenase [ubiquinone] 1 alpha subcomplex subunit 6 OS=Homo sapiens OX=9606 GN=NDUFA6 PE=1 SV=1
sp|P56556|NDUA6_HUMAN	25.07	12	551880	2	2	2	15137	NADH dehydrogenase [ubiquinone] 1 alpha subcomplex subunit 6 OS=Homo sapiens OX=9606 GN=NDUFA6 PE=1 SV=4
tr|A0A0C4DGS0|A0A0C4DGS0_HUMAN	25.07	12	551880	2	2	2	15137	NADH dehydrogenase [ubiquinone] 1 alpha subcomplex subunit 6 OS=Homo sapiens OX=9606 GN=NDUFA6 PE=1 SV=1
tr|A0A2Y9D025|A0A2Y9D025_HUMAN	25.07	10	551880	2	2	2	17871	NADH dehydrogenase [ubiquinone] 1 alpha subcomplex subunit 6 OS=Homo sapiens OX=9606 GN=NDUFA6 PE=1 SV=1
tr|H0YEE8|H0YEE8_HUMAN	24.94	3	10982000	1	1	1	38044	Terminal uridylyltransferase 4 (Fragment) OS=Homo sapiens OX=9606 GN=TUT4 PE=1 SV=1
sp|Q5TAX3|TUT4_HUMAN	24.94	1	10982000	1	1	1	185164	Terminal uridylyltransferase 4 OS=Homo sapiens OX=9606 GN=TUT4 PE=1 SV=3
tr|A0A0C4DFM7|A0A0C4DFM7_HUMAN	24.94	1	10982000	1	1	1	185251	Terminal uridylyltransferase 4 OS=Homo sapiens OX=9606 GN=TUT4 PE=1 SV=1
sp|Q99549|MPP8_HUMAN	24.87	1	24453000	1	1	1	97182	M-phase phosphoprotein 8 OS=Homo sapiens OX=9606 GN=MPHOSPH8 PE=1 SV=2
tr|H0Y6J1|H0Y6J1_HUMAN	24.87	5	24453000	1	1	1	16498	M-phase phosphoprotein 8 (Fragment) OS=Homo sapiens OX=9606 GN=MPHOSPH8 PE=1 SV=1
sp|P02790|HEMO_HUMAN	24.73	5	1221000	2	2	2	51676	Hemopexin OS=Homo sapiens OX=9606 GN=HPX PE=1 SV=2
tr|E9PEN0|E9PEN0_HUMAN	24.66	5	2650700	1	1	1	16646	Inhibitor of growth protein 5 OS=Homo sapiens OX=9606 GN=ING5 PE=1 SV=1
sp|Q8WYH8|ING5_HUMAN	24.66	3	2650700	1	1	1	27751	Inhibitor of growth protein 5 OS=Homo sapiens OX=9606 GN=ING5 PE=1 SV=1
tr|A0A1B0GW41|A0A1B0GW41_HUMAN	24.66	3	2650700	1	1	1	28290	Inhibitor of growth protein 5 OS=Homo sapiens OX=9606 GN=ING5 PE=1 SV=1
sp|Q8N475|FSTL5_HUMAN	24.42	1	3652600	1	1	2	95751	Follistatin-related protein 5 OS=Homo sapiens OX=9606 GN=FSTL5 PE=2 SV=2
tr|A0A3B3IT92|A0A3B3IT92_HUMAN	24.41	2	109800	2	2	2	100735	DNA helicase OS=Homo sapiens OX=9606 GN=MCM4 PE=1 SV=1
sp|Q9HCJ6|VAT1L_HUMAN	24.37	2	438860	1	1	1	45899	Synaptic vesicle membrane protein VAT-1 homolog-like OS=Homo sapiens OX=9606 GN=VAT1L PE=1 SV=2
tr|E9PP21|E9PP21_HUMAN	24.29	9	342250	1	1	1	16940	Cysteine and glycine-rich protein 1 OS=Homo sapiens OX=9606 GN=CSRP1 PE=1 SV=1
sp|A0A075B6H9|LV469_HUMAN	24.19	6	1471900	1	1	1	12773	Immunoglobulin lambda variable 4-69 OS=Homo sapiens OX=9606 GN=IGLV4-69 PE=1 SV=1
sp|A0A0B4J1Y8|LV949_HUMAN	24.19	6	1471900	1	1	1	13024	Immunoglobulin lambda variable 9-49 OS=Homo sapiens OX=9606 GN=IGLV9-49 PE=1 SV=1
sp|Q9UBF2|COPG2_HUMAN	24.18	3	546790	3	2	3	97622	Coatomer subunit gamma-2 OS=Homo sapiens OX=9606 GN=COPG2 PE=1 SV=1
tr|C9JPE8|C9JPE8_HUMAN	24.1	11	1144600	1	1	1	11227	Ras-related protein Ral-A (Fragment) OS=Homo sapiens OX=9606 GN=RALA PE=1 SV=1
tr|H7C3P7|H7C3P7_HUMAN	24.1	7	1144600	1	1	1	18379	Ras-related protein Ral-A (Fragment) OS=Homo sapiens OX=9606 GN=RALA PE=1 SV=1
sp|O43151|TET3_HUMAN	23.99	2	1272300	1	1	1	179349	Methylcytosine dioxygenase TET3 OS=Homo sapiens OX=9606 GN=TET3 PE=1 SV=3
tr|J3KNF3|J3KNF3_HUMAN	23.99	2	1272300	1	1	1	183583	Methylcytosine dioxygenase TET3 OS=Homo sapiens OX=9606 GN=TET3 PE=1 SV=2
tr|M0QXL5|M0QXL5_HUMAN	23.98	4	437730	1	1	1	26639	rRNA 2'-O-methyltransferase fibrillarin (Fragment) OS=Homo sapiens OX=9606 GN=FBL PE=1 SV=1
sp|P22087|FBRL_HUMAN	23.98	3	437730	1	1	1	33784	rRNA 2'-O-methyltransferase fibrillarin OS=Homo sapiens OX=9606 GN=FBL PE=1 SV=2
tr|M0R2U2|M0R2U2_HUMAN	23.98	6	437730	1	1	1	16164	rRNA 2'-O-methyltransferase fibrillarin (Fragment) OS=Homo sapiens OX=9606 GN=FBL PE=1 SV=1
tr|M0R1H0|M0R1H0_HUMAN	23.98	5	437730	1	1	1	17973	rRNA 2'-O-methyltransferase fibrillarin (Fragment) OS=Homo sapiens OX=9606 GN=FBL PE=1 SV=1
tr|M0R2B0|M0R2B0_HUMAN	23.98	5	437730	1	1	1	18198	rRNA 2'-O-methyltransferase fibrillarin (Fragment) OS=Homo sapiens OX=9606 GN=FBL PE=1 SV=1
tr|K7EQ86|K7EQ86_HUMAN	23.91	1	211770	3	3	5	237296	KIAA0100 isoform CRA_a OS=Homo sapiens OX=9606 GN=KIAA0100 PE=1 SV=1
tr|Q08E86|Q08E86_HUMAN	23.91	1	211770	3	3	5	237310	KIAA0100 protein OS=Homo sapiens OX=9606 GN=KIAA0100 PE=1 SV=1
sp|Q14667|K0100_HUMAN	23.91	1	211770	3	3	5	253698	Protein KIAA0100 OS=Homo sapiens OX=9606 GN=KIAA0100 PE=1 SV=3
sp|Q6Y1H2|HACD2_HUMAN	23.86	5	1205100	1	1	1	28368	Very-long-chain (3R)-3-hydroxyacyl-CoA dehydratase 2 OS=Homo sapiens OX=9606 GN=HACD2 PE=1 SV=1
sp|Q9Y2E6|DTX4_HUMAN	23.8	3	143560	2	2	2	67258	E3 ubiquitin-protein ligase DTX4 OS=Homo sapiens OX=9606 GN=DTX4 PE=1 SV=2
sp|Q9H0A0|NAT10_HUMAN	23.66	1	362990	1	1	1	115730	RNA cytidine acetyltransferase OS=Homo sapiens OX=9606 GN=NAT10 PE=1 SV=2
tr|A0A087WV29|A0A087WV29_HUMAN	23.66	1	362990	1	1	1	93535	RNA cytidine acetyltransferase OS=Homo sapiens OX=9606 GN=NAT10 PE=1 SV=1
sp|P16422|EPCAM_HUMAN	23.62	3	188520	1	1	2	34932	Epithelial cell adhesion molecule OS=Homo sapiens OX=9606 GN=EPCAM PE=1 SV=2
tr|B5MCA4|B5MCA4_HUMAN	23.62	2	188520	1	1	2	37893	Epithelial cell adhesion molecule OS=Homo sapiens OX=9606 GN=EPCAM PE=1 SV=1
tr|E9PL01|E9PL01_HUMAN	23.48	10	2569700	2	2	3	17027	Signal peptidase complex subunit 2 OS=Homo sapiens OX=9606 GN=SPCS2 PE=1 SV=1
sp|Q15005|SPCS2_HUMAN	23.48	7	2569700	2	2	3	25003	Signal peptidase complex subunit 2 OS=Homo sapiens OX=9606 GN=SPCS2 PE=1 SV=3
tr|A0A087WUC6|A0A087WUC6_HUMAN	23.48	7	2569700	2	2	3	25090	Signal peptidase complex subunit 2 OS=Homo sapiens OX=9606 GN=SPCS2 PE=1 SV=1
tr|E9PI68|E9PI68_HUMAN	23.48	6	2569700	2	2	3	28503	Signal peptidase complex subunit 2 OS=Homo sapiens OX=9606 GN=SPCS2 PE=1 SV=1
tr|E9PRB9|E9PRB9_HUMAN	23.48	8	1092500	1	1	2	10163	Signal peptidase complex subunit 2 OS=Homo sapiens OX=9606 GN=SPCS2 PE=1 SV=1
sp|Q8TCJ2|STT3B_HUMAN	23.45	1	0	1	1	1	93674	Dolichyl-diphosphooligosaccharide--protein glycosyltransferase subunit STT3B OS=Homo sapiens OX=9606 GN=STT3B PE=1 SV=1
sp|O43306|ADCY6_HUMAN	23.42	1	93023000	1	1	7	130615	Adenylate cyclase type 6 OS=Homo sapiens OX=9606 GN=ADCY6 PE=1 SV=2
tr|B3KWA8|B3KWA8_HUMAN	23.42	1	93023000	1	1	7	103868	Adenylate cyclase type 5 OS=Homo sapiens OX=9606 GN=ADCY5 PE=1 SV=1
sp|Q6UWL2|SUSD1_HUMAN	23.41	1	9367100	1	1	1	82710	Sushi domain-containing protein 1 OS=Homo sapiens OX=9606 GN=SUSD1 PE=1 SV=1
sp|P53680|AP2S1_HUMAN	23.29	5	1737700	1	1	1	17018	AP-2 complex subunit sigma OS=Homo sapiens OX=9606 GN=AP2S1 PE=1 SV=2
tr|M0R0N4|M0R0N4_HUMAN	23.29	5	1737700	1	1	1	17303	AP complex subunit sigma OS=Homo sapiens OX=9606 GN=AP2S1 PE=1 SV=1
tr|X6R390|X6R390_HUMAN	23.29	4	1737700	1	1	1	18414	AP complex subunit sigma OS=Homo sapiens OX=9606 GN=AP2S1 PE=1 SV=1
tr|M0QYZ2|M0QYZ2_HUMAN	23.29	4	1737700	1	1	1	18929	AP complex subunit sigma OS=Homo sapiens OX=9606 GN=AP2S1 PE=1 SV=1
tr|J3QRS9|J3QRS9_HUMAN	23.28	3	75013	1	1	2	52542	BUB3-interacting and GLEBS motif-containing protein ZNF207 OS=Homo sapiens OX=9606 GN=ZNF207 PE=1 SV=1
sp|Q15070|OXA1L_HUMAN	23.24	2	1156900	1	1	1	48548	Mitochondrial inner membrane protein OXA1L OS=Homo sapiens OX=9606 GN=OXA1L PE=1 SV=3
tr|J3KNA0|J3KNA0_HUMAN	23.24	2	1156900	1	1	1	55270	Mitochondrial inner membrane protein OXA1L OS=Homo sapiens OX=9606 GN=OXA1L PE=1 SV=1
tr|A0A024R6I7|A0A024R6I7_HUMAN	23.17	4	1664000	2	2	2	46709	Alpha-1-antitrypsin OS=Homo sapiens OX=9606 GN=SERPINA1 PE=1 SV=1
sp|P01009|A1AT_HUMAN	23.17	4	1664000	2	2	2	46737	Alpha-1-antitrypsin OS=Homo sapiens OX=9606 GN=SERPINA1 PE=1 SV=3
tr|G3V2B9|G3V2B9_HUMAN	23.17	8	748340	1	1	1	11798	Alpha-1-antitrypsin (Fragment) OS=Homo sapiens OX=9606 GN=SERPINA1 PE=1 SV=1
tr|A0A0G2JRN3|A0A0G2JRN3_HUMAN	23.17	2	748340	1	1	1	40235	Alpha-1-antitrypsin OS=Homo sapiens OX=9606 GN=SERPINA1 PE=1 SV=1
tr|G3V1Q4|G3V1Q4_HUMAN	23.15	2	355590	1	1	1	46566	Septin-7 OS=Homo sapiens OX=9606 GN=SEPT7 PE=1 SV=2
tr|E7ES33|E7ES33_HUMAN	23.15	2	355590	1	1	1	48716	Septin-7 OS=Homo sapiens OX=9606 GN=SEPT7 PE=1 SV=3
sp|Q16181|SEPT7_HUMAN	23.15	2	355590	1	1	1	50680	Septin-7 OS=Homo sapiens OX=9606 GN=SEPT7 PE=1 SV=2
tr|E7EPK1|E7EPK1_HUMAN	23.15	2	355590	1	1	1	50695	Septin-7 OS=Homo sapiens OX=9606 GN=SEPT7 PE=1 SV=2
tr|C9JV02|C9JV02_HUMAN	23.15	7	355590	1	1	1	15045	Septin-8 (Fragment) OS=Homo sapiens OX=9606 GN=SEPT8 PE=1 SV=1
tr|A0A0U1RRH9|A0A0U1RRH9_HUMAN	23.15	6	355590	1	1	1	16464	Septin-7 (Fragment) OS=Homo sapiens OX=9606 GN=SEPT7 PE=1 SV=1
tr|A0A0U1RRE1|A0A0U1RRE1_HUMAN	23.15	6	355590	1	1	1	17710	Septin-7 (Fragment) OS=Homo sapiens OX=9606 GN=SEPT7 PE=1 SV=1
tr|D6RDU5|D6RDU5_HUMAN	23.15	2	355590	1	1	1	43113	Septin-11 (Fragment) OS=Homo sapiens OX=9606 GN=SEPT11 PE=1 SV=1
tr|D6RGI3|D6RGI3_HUMAN	23.15	2	355590	1	1	1	49006	Septin 11 isoform CRA_b OS=Homo sapiens OX=9606 GN=SEPT11 PE=1 SV=1
tr|A0A087X142|A0A087X142_HUMAN	23.15	2	355590	1	1	1	49356	Septin-8 OS=Homo sapiens OX=9606 GN=SEPT8 PE=1 SV=1
sp|Q9NVA2|SEP11_HUMAN	23.15	2	355590	1	1	1	49398	Septin-11 OS=Homo sapiens OX=9606 GN=SEPT11 PE=1 SV=3
tr|A6NMH6|A6NMH6_HUMAN	23.15	2	355590	1	1	1	49916	Septin-8 OS=Homo sapiens OX=9606 GN=SEPT8 PE=1 SV=1
tr|B1AMS2|B1AMS2_HUMAN	23.15	2	355590	1	1	1	49303	Septin 6 isoform CRA_b OS=Homo sapiens OX=9606 GN=SEPT6 PE=1 SV=1
sp|Q6ZU15|SEP14_HUMAN	23.15	2	355590	1	1	1	50025	Septin-14 OS=Homo sapiens OX=9606 GN=SEPT14 PE=1 SV=2
tr|D6RER5|D6RER5_HUMAN	23.15	2	355590	1	1	1	49809	Septin-11 OS=Homo sapiens OX=9606 GN=SEPT11 PE=1 SV=1
sp|Q14141|SEPT6_HUMAN	23.15	2	355590	1	1	1	49717	Septin-6 OS=Homo sapiens OX=9606 GN=SEPT6 PE=1 SV=4
tr|A6NFQ9|A6NFQ9_HUMAN	23.15	2	355590	1	1	1	50928	Septin-8 OS=Homo sapiens OX=9606 GN=SEPT8 PE=1 SV=1
tr|F8W8I8|F8W8I8_HUMAN	23.15	2	355590	1	1	1	53163	Septin-8 OS=Homo sapiens OX=9606 GN=SEPT8 PE=1 SV=1
sp|Q92599|SEPT8_HUMAN	23.15	2	355590	1	1	1	55756	Septin-8 OS=Homo sapiens OX=9606 GN=SEPT8 PE=1 SV=4
tr|A0A0C4DH90|A0A0C4DH90_HUMAN	23.14	8	16639000	1	1	1	12586	Immunoglobulin kappa variable 3/OR2-268 (non-functional) (Fragment) OS=Homo sapiens OX=9606 GN=IGKV3OR2-268 PE=4 SV=5
tr|A0A075B6H7|A0A075B6H7_HUMAN	23.14	8	16639000	1	1	1	12783	Immunoglobulin kappa variable 3-7 (non-functional) (Fragment) OS=Homo sapiens OX=9606 GN=IGKV3-7 PE=1 SV=1
sp|A0A0C4DH55|KVD07_HUMAN	23.14	8	16639000	1	1	1	13148	Immunoglobulin kappa variable 3D-7 OS=Homo sapiens OX=9606 GN=IGKV3D-7 PE=3 SV=5
sp|P01624|KV315_HUMAN	23.14	8	16639000	1	1	1	12496	Immunoglobulin kappa variable 3-15 OS=Homo sapiens OX=9606 GN=IGKV3-15 PE=1 SV=2
sp|Q96G03|PGM2_HUMAN	23.07	8	1156500	3	3	3	68283	Phosphoglucomutase-2 OS=Homo sapiens OX=9606 GN=PGM2 PE=1 SV=4
tr|Q5VU77|Q5VU77_HUMAN	22.98	3	166220	1	1	1	37961	Ubiquitin-associated protein 2-like (Fragment) OS=Homo sapiens OX=9606 GN=UBAP2L PE=1 SV=1
tr|F8W726|F8W726_HUMAN	22.98	1	166220	1	1	1	113628	Ubiquitin-associated protein 2-like OS=Homo sapiens OX=9606 GN=UBAP2L PE=1 SV=2
sp|Q14157|UBP2L_HUMAN	22.98	1	166220	1	1	1	114534	Ubiquitin-associated protein 2-like OS=Homo sapiens OX=9606 GN=UBAP2L PE=1 SV=2
sp|Q05209|PTN12_HUMAN	22.97	1	570780	1	1	1	88106	Tyrosine-protein phosphatase non-receptor type 12 OS=Homo sapiens OX=9606 GN=PTPN12 PE=1 SV=3
sp|Q9Y4G6|TLN2_HUMAN	22.97	0	0	1	1	1	271611	Talin-2 OS=Homo sapiens OX=9606 GN=TLN2 PE=1 SV=4
tr|H0YD97|H0YD97_HUMAN	22.88	5	179460	1	1	1	20682	Pyruvate dehydrogenase protein X component mitochondrial (Fragment) OS=Homo sapiens OX=9606 GN=PDHX PE=1 SV=1
sp|O00330|ODPX_HUMAN	22.88	2	179460	1	1	1	54122	Pyruvate dehydrogenase protein X component mitochondrial OS=Homo sapiens OX=9606 GN=PDHX PE=1 SV=3
sp|P01876|IGHA1_HUMAN	22.77	2	0	1	1	1	37655	Immunoglobulin heavy constant alpha 1 OS=Homo sapiens OX=9606 GN=IGHA1 PE=1 SV=2
tr|A0A286YEY1|A0A286YEY1_HUMAN	22.77	2	0	1	1	1	42849	Immunoglobulin heavy constant alpha 1 (Fragment) OS=Homo sapiens OX=9606 GN=IGHA1 PE=1 SV=1
tr|A0A0G2JMB2|A0A0G2JMB2_HUMAN	22.77	2	0	1	1	1	36508	Immunoglobulin heavy constant alpha 2 (Fragment) OS=Homo sapiens OX=9606 GN=IGHA2 PE=1 SV=1
sp|P01877|IGHA2_HUMAN	22.77	2	0	1	1	1	36591	Immunoglobulin heavy constant alpha 2 OS=Homo sapiens OX=9606 GN=IGHA2 PE=1 SV=4
tr|A0A286YEY5|A0A286YEY5_HUMAN	22.77	2	0	1	1	1	42334	Immunoglobulin heavy constant alpha 2 (Fragment) OS=Homo sapiens OX=9606 GN=IGHA2 PE=1 SV=1
sp|Q13402|MYO7A_HUMAN	0	0	8600000	1	1	1	254388	Unconventional myosin-VIIa OS=Homo sapiens OX=9606 GN=MYO7A PE=1 SV=2
sp|B2RTY4|MYO9A_HUMAN	0	0	162070	1	1	1	292704	Unconventional myosin-IXa OS=Homo sapiens OX=9606 GN=MYO9A PE=1 SV=2
sp|Q8TDJ6|DMXL2_HUMAN	0	0	73306	1	1	1	339642	DmX-like protein 2 OS=Homo sapiens OX=9606 GN=DMXL2 PE=1 SV=2
sp|Q86T82|UBP37_HUMAN	0	1	12847000	1	1	1	110170	Ubiquitin carboxyl-terminal hydrolase 37 OS=Homo sapiens OX=9606 GN=USP37 PE=1 SV=2
tr|M0R2K1|M0R2K1_HUMAN	0	1	4820000	1	1	3	76141	Radial spoke head protein 6 homolog A OS=Homo sapiens OX=9606 GN=RSPH6A PE=1 SV=1
tr|M0QZD8|M0QZD8_HUMAN	0	0	1869200	1	1	3	357810	Uncharacterized protein OS=Homo sapiens OX=9606 GN=LOC400499 PE=4 SV=3
sp|Q9UFE4|CCD39_HUMAN	0	1	463400	1	1	2	109901	Coiled-coil domain-containing protein 39 OS=Homo sapiens OX=9606 GN=CCDC39 PE=2 SV=3
tr|J3KRA9|J3KRA9_HUMAN	0	0	1086200000	1	1	1	398840	Serine/threonine-protein kinase SMG1 (Fragment) OS=Homo sapiens OX=9606 GN=SMG1 PE=1 SV=1
sp|Q8IZQ1|WDFY3_HUMAN	0	0	510010	1	1	1	395260	WD repeat and FYVE domain-containing protein 3 OS=Homo sapiens OX=9606 GN=WDFY3 PE=1 SV=2
sp|Q5CZC0|FSIP2_HUMAN	0	0	3137600	1	1	1	780624	Fibrous sheath-interacting protein 2 OS=Homo sapiens OX=9606 GN=FSIP2 PE=2 SV=4
sp|P46939|UTRO_HUMAN	0	0	0	1	1	1	394467	Utrophin OS=Homo sapiens OX=9606 GN=UTRN PE=1 SV=2
sp|Q12955|ANK3_HUMAN	0	0	334600	1	1	1	480416	Ankyrin-3 OS=Homo sapiens OX=9606 GN=ANK3 PE=1 SV=3
tr|K7EK91|K7EK91_HUMAN	0	0	0	1	1	1	508791	Dynein heavy chain 17 axonemal OS=Homo sapiens OX=9606 GN=DNAH17 PE=1 SV=1
sp|P13611|CSPG2_HUMAN	0	0	0	1	1	1	372821	Versican core protein OS=Homo sapiens OX=9606 GN=VCAN PE=1 SV=3
sp|Q13085|ACACA_HUMAN	0	1	346550	2	2	4	265551	Acetyl-CoA carboxylase 1 OS=Homo sapiens OX=9606 GN=ACACA PE=1 SV=2
sp|Q8IZT6|ASPM_HUMAN	0	0	7353100	1	1	1	409801	Abnormal spindle-like microcephaly-associated protein OS=Homo sapiens OX=9606 GN=ASPM PE=1 SV=2
sp|O15078|CE290_HUMAN	0	1	333120	2	2	2	290384	Centrosomal protein of 290 kDa OS=Homo sapiens OX=9606 GN=CEP290 PE=1 SV=2
sp|P25205|MCM3_HUMAN	0	4	7119700	4	3	5	90981	DNA replication licensing factor MCM3 OS=Homo sapiens OX=9606 GN=MCM3 PE=1 SV=3
tr|A0A140T8Z0|A0A140T8Z0_HUMAN	0	2	248040	2	2	2	140300	Protein diaphanous homolog 1 OS=Homo sapiens OX=9606 GN=DIAPH1 PE=1 SV=1
sp|O95613|PCNT_HUMAN	0	0	132440	1	1	1	378039	Pericentrin OS=Homo sapiens OX=9606 GN=PCNT PE=1 SV=4
sp|O94776|MTA2_HUMAN	0	1	759170	1	1	1	75023	Metastasis-associated protein MTA2 OS=Homo sapiens OX=9606 GN=MTA2 PE=1 SV=1
sp|P02751|FINC_HUMAN	0	1	723440	3	3	3	262622	Fibronectin OS=Homo sapiens OX=9606 GN=FN1 PE=1 SV=4
sp|O14802|RPC1_HUMAN	0	1	0	1	1	1	155641	DNA-directed RNA polymerase III subunit RPC1 OS=Homo sapiens OX=9606 GN=POLR3A PE=1 SV=2
sp|Q9UQP3|TENN_HUMAN	0	1	2534300	1	1	1	144034	Tenascin-N OS=Homo sapiens OX=9606 GN=TNN PE=1 SV=2
sp|Q4G0P3|HYDIN_HUMAN	0	0	222460	1	1	1	575900	Hydrocephalus-inducing protein homolog OS=Homo sapiens OX=9606 GN=HYDIN PE=1 SV=3
sp|A6NC98|CC88B_HUMAN	0	1	6388400	1	1	2	164808	Coiled-coil domain-containing protein 88B OS=Homo sapiens OX=9606 GN=CCDC88B PE=1 SV=1
sp|Q6PIF6|MYO7B_HUMAN	0	1	433000	1	1	1	241597	Unconventional myosin-VIIb OS=Homo sapiens OX=9606 GN=MYO7B PE=1 SV=2
sp|Q10567|AP1B1_HUMAN	0	1	430250	1	1	1	104637	AP-1 complex subunit beta-1 OS=Homo sapiens OX=9606 GN=AP1B1 PE=1 SV=2
tr|A0A0R4J2E8|A0A0R4J2E8_HUMAN	0	2	60289	1	1	2	94623	Matrin-3 OS=Homo sapiens OX=9606 GN=MATR3 PE=1 SV=1
sp|P13569|CFTR_HUMAN	0	1	2160400	1	1	2	168141	Cystic fibrosis transmembrane conductance regulator OS=Homo sapiens OX=9606 GN=CFTR PE=1 SV=3
sp|Q9BZH6|WDR11_HUMAN	0	1	102990000	1	1	3	136685	WD repeat-containing protein 11 OS=Homo sapiens OX=9606 GN=WDR11 PE=1 SV=1
sp|Q8TBZ0|CC110_HUMAN	0	1	322610	1	1	1	96725	Coiled-coil domain-containing protein 110 OS=Homo sapiens OX=9606 GN=CCDC110 PE=1 SV=1
tr|A0A0A0MR42|A0A0A0MR42_HUMAN	0	1	2293500	2	1	2	226991	Centrosomal protein of 192 kDa OS=Homo sapiens OX=9606 GN=CEP192 PE=1 SV=1
sp|Q14008|CKAP5_HUMAN	0	1	139340	1	1	1	225493	Cytoskeleton-associated protein 5 OS=Homo sapiens OX=9606 GN=CKAP5 PE=1 SV=3
sp|Q96T23|RSF1_HUMAN	0	0	23022000	1	1	1	163820	Remodeling and spacing factor 1 OS=Homo sapiens OX=9606 GN=RSF1 PE=1 SV=2
tr|Q5T321|Q5T321_HUMAN	0	0	10862000	1	1	1	327548	Neurobeachin isoform CRA_e OS=Homo sapiens OX=9606 GN=NBEA PE=1 SV=1
sp|Q5H9U9|DDX6L_HUMAN	0	1	1150800	1	1	1	197672	Probable ATP-dependent RNA helicase DDX60-like OS=Homo sapiens OX=9606 GN=DDX60L PE=2 SV=2
sp|Q9C0D2|CE295_HUMAN	0	0	1916500	1	1	1	295175	Centrosomal protein of 295 kDa OS=Homo sapiens OX=9606 GN=CEP295 PE=1 SV=4
sp|Q13315|ATM_HUMAN	0	0	227810	1	1	1	350687	Serine-protein kinase ATM OS=Homo sapiens OX=9606 GN=ATM PE=1 SV=4
tr|C9JQE8|C9JQE8_HUMAN	0	1	67253000	1	1	2	160395	Nuclear receptor corepressor 2 (Fragment) OS=Homo sapiens OX=9606 GN=NCOR2 PE=1 SV=1
sp|Q13610|PWP1_HUMAN	0	2	245550	1	1	1	55828	Periodic tryptophan protein 1 homolog OS=Homo sapiens OX=9606 GN=PWP1 PE=1 SV=1
tr|H7C539|H7C539_HUMAN	0	4	8002800	1	1	1	23426	Regulator of G-protein-signaling 3 (Fragment) OS=Homo sapiens OX=9606 GN=RGS3 PE=1 SV=1
sp|Q5VUA4|ZN318_HUMAN	0	0	42135000	1	1	1	251110	Zinc finger protein 318 OS=Homo sapiens OX=9606 GN=ZNF318 PE=1 SV=2
sp|O75533|SF3B1_HUMAN	0	1	459540	1	1	1	145830	Splicing factor 3B subunit 1 OS=Homo sapiens OX=9606 GN=SF3B1 PE=1 SV=3
sp|Q9ULL0|K1210_HUMAN	0	1	774080	1	1	1	187020	Acrosomal protein KIAA1210 OS=Homo sapiens OX=9606 GN=KIAA1210 PE=2 SV=3
sp|Q9H799|CPLN1_HUMAN	0	0	14047000	1	1	1	361747	Ciliogenesis and planar polarity effector 1 OS=Homo sapiens OX=9606 GN=CPLANE1 PE=1 SV=4
tr|A0A0J9YY99|A0A0J9YY99_HUMAN	0	8	111990	1	1	1	12965	Uncharacterized protein (Fragment) OS=Homo sapiens OX=9606 PE=1 SV=1
tr|A0A2R8Y5P9|A0A2R8Y5P9_HUMAN	0	1	2360100	2	2	2	208048	Protein Shroom3 OS=Homo sapiens OX=9606 GN=SHROOM3 PE=1 SV=1
tr|A0A0G2JP87|A0A0G2JP87_HUMAN	0	1	2302100000	1	1	2	98876	Coiled-coil alpha-helical rod protein 1 OS=Homo sapiens OX=9606 GN=CCHCR1 PE=1 SV=1
tr|S4R2X0|S4R2X0_HUMAN	0	1	25844000	1	1	1	125717	Neuroblastoma breakpoint family member 1 OS=Homo sapiens OX=9606 GN=NBPF1 PE=4 SV=2
sp|Q96T68|SETB2_HUMAN	0	1	1093600	1	1	1	81894	Histone-lysine N-methyltransferase SETDB2 OS=Homo sapiens OX=9606 GN=SETDB2 PE=1 SV=2
sp|Q8TD84|DSCL1_HUMAN	0	0	0	1	1	1	224461	Down syndrome cell adhesion molecule-like protein 1 OS=Homo sapiens OX=9606 GN=DSCAML1 PE=1 SV=2
sp|Q06323|PSME1_HUMAN	0	6	858840	2	2	2	28723	Proteasome activator complex subunit 1 OS=Homo sapiens OX=9606 GN=PSME1 PE=1 SV=1
sp|P51587|BRCA2_HUMAN	0	0	489350	1	1	1	384204	Breast cancer type 2 susceptibility protein OS=Homo sapiens OX=9606 GN=BRCA2 PE=1 SV=3
tr|E7EMW7|E7EMW7_HUMAN	0	0	290820	1	1	1	308574	E3 ubiquitin-protein ligase UBR5 OS=Homo sapiens OX=9606 GN=UBR5 PE=1 SV=1
sp|A7MCY6|TBKB1_HUMAN	0	1	866200	1	1	1	67702	TANK-binding kinase 1-binding protein 1 OS=Homo sapiens OX=9606 GN=TBKBP1 PE=1 SV=1
sp|P0CF97|F200B_HUMAN	0	1	1950100	1	1	1	76034	Protein FAM200B OS=Homo sapiens OX=9606 GN=FAM200B PE=3 SV=1
tr|E9PFH2|E9PFH2_HUMAN	0	1	1524100	1	1	1	166919	Lysine-specific demethylase 5D (Fragment) OS=Homo sapiens OX=9606 GN=KDM5D PE=4 SV=1
tr|A0A087WSW2|A0A087WSW2_HUMAN	0	1	254620	1	1	1	95104	Zinc finger protein 43 OS=Homo sapiens OX=9606 GN=ZNF43 PE=4 SV=1
sp|Q9Y6D5|BIG2_HUMAN	0	0	7996500	1	1	1	202037	Brefeldin A-inhibited guanine nucleotide-exchange protein 2 OS=Homo sapiens OX=9606 GN=ARFGEF2 PE=1 SV=3
sp|D6RGX4|F90AP_HUMAN	0	2	22637	1	1	1	49883	Putative protein FAM90A26 OS=Homo sapiens OX=9606 GN=FAM90A26 PE=5 SV=1
sp|O43772|MCAT_HUMAN	0	3	524240	1	1	1	32944	Mitochondrial carnitine/acylcarnitine carrier protein OS=Homo sapiens OX=9606 GN=SLC25A20 PE=1 SV=1
sp|P09960|LKHA4_HUMAN	0	3	644490	2	2	2	69285	Leukotriene A-4 hydrolase OS=Homo sapiens OX=9606 GN=LTA4H PE=1 SV=2
sp|Q13796|SHRM2_HUMAN	0	1	295610	1	1	1	176409	Protein Shroom2 OS=Homo sapiens OX=9606 GN=SHROOM2 PE=1 SV=1
tr|I3L3D7|I3L3D7_HUMAN	0	3	3978000	1	1	2	25399	Serine protease 33 (Fragment) OS=Homo sapiens OX=9606 GN=PRSS33 PE=1 SV=1
tr|M0QZJ5|M0QZJ5_HUMAN	0	3	6172500	1	1	2	25802	Calcium-binding mitochondrial carrier protein SCaMC-3 (Fragment) OS=Homo sapiens OX=9606 GN=SLC25A23 PE=1 SV=1
sp|Q99613|EIF3C_HUMAN	0	1	241850	1	1	1	105344	Eukaryotic translation initiation factor 3 subunit C OS=Homo sapiens OX=9606 GN=EIF3C PE=1 SV=1
sp|Q9BW92|SYTM_HUMAN	0	1	753870	1	1	1	81036	Threonine--tRNA ligase mitochondrial OS=Homo sapiens OX=9606 GN=TARS2 PE=1 SV=1
tr|B5MCX3|B5MCX3_HUMAN	0	8	2761700	2	2	2	36940	Septin-2 OS=Homo sapiens OX=9606 GN=SEPT2 PE=1 SV=1
sp|P40692|MLH1_HUMAN	0	1	320160	1	1	2	84601	DNA mismatch repair protein Mlh1 OS=Homo sapiens OX=9606 GN=MLH1 PE=1 SV=1
tr|A0A087WTD7|A0A087WTD7_HUMAN	0	1	17642000	1	1	1	161184	A-kinase anchor protein 13 OS=Homo sapiens OX=9606 GN=AKAP13 PE=1 SV=1
sp|Q9BYX2|TBD2A_HUMAN	0	1	104550	1	1	1	105414	TBC1 domain family member 2A OS=Homo sapiens OX=9606 GN=TBC1D2 PE=1 SV=3
sp|Q12923|PTN13_HUMAN	0	0	0	1	1	1	276903	Tyrosine-protein phosphatase non-receptor type 13 OS=Homo sapiens OX=9606 GN=PTPN13 PE=1 SV=2
sp|A0A075B6I1|LV460_HUMAN	0	8	0	1	1	3	12987	Immunoglobulin lambda variable 4-60 OS=Homo sapiens OX=9606 GN=IGLV4-60 PE=3 SV=1
sp|P13489|RINI_HUMAN	0	3	68583	1	1	1	49974	Ribonuclease inhibitor OS=Homo sapiens OX=9606 GN=RNH1 PE=1 SV=2
tr|E9PK67|E9PK67_HUMAN	0	3	821730	1	1	1	109097	Poly [ADP-ribose] polymerase OS=Homo sapiens OX=9606 GN=PARP10 PE=1 SV=1
sp|O95671|ASML_HUMAN	0	3	0	1	1	1	68857	Probable bifunctional dTTP/UTP pyrophosphatase/methyltransferase protein OS=Homo sapiens OX=9606 GN=ASMTL PE=1 SV=3
tr|I3L4X2|I3L4X2_HUMAN	0	0	335320	1	1	1	160557	Multidrug resistance-associated protein 1 (Fragment) OS=Homo sapiens OX=9606 GN=ABCC1 PE=1 SV=1
tr|A0A0G2JRQ6|A0A0G2JRQ6_HUMAN	0	14	2889200	2	2	2	12748	Uncharacterized protein (Fragment) OS=Homo sapiens OX=9606 PE=1 SV=4
sp|Q7Z4G4|TRM11_HUMAN	0	2	186780	1	1	1	53421	tRNA (guanine(10)-N2)-methyltransferase homolog OS=Homo sapiens OX=9606 GN=TRMT11 PE=1 SV=1
sp|Q9Y520|PRC2C_HUMAN	0	0	333020	1	1	1	316911	Protein PRRC2C OS=Homo sapiens OX=9606 GN=PRRC2C PE=1 SV=4
sp|O15031|PLXB2_HUMAN	0	0	0	1	1	1	205126	Plexin-B2 OS=Homo sapiens OX=9606 GN=PLXNB2 PE=1 SV=3
tr|A0A0A0MSK6|A0A0A0MSK6_HUMAN	0	0	3464700	1	1	2	171684	Rho GTPase-activating protein 5 OS=Homo sapiens OX=9606 GN=ARHGAP5 PE=1 SV=1
sp|Q6IQ55|TTBK2_HUMAN	0	3	3311900	1	1	1	137412	Tau-tubulin kinase 2 OS=Homo sapiens OX=9606 GN=TTBK2 PE=1 SV=2
tr|B9ZVN9|B9ZVN9_HUMAN	0	2	352700	1	1	1	187807	DNA-directed RNA polymerase subunit OS=Homo sapiens OX=9606 GN=POLR1A PE=1 SV=1
sp|Q9NSI6|BRWD1_HUMAN	0	1	835690	2	2	2	262934	Bromodomain and WD repeat-containing protein 1 OS=Homo sapiens OX=9606 GN=BRWD1 PE=1 SV=4
tr|F5H5K1|F5H5K1_HUMAN	0	1	225710	1	1	2	96433	Leucine-rich repeat-containing protein 37B OS=Homo sapiens OX=9606 GN=LRRC37B PE=1 SV=1
sp|P25440|BRD2_HUMAN	0	3	224960	1	1	1	88061	Bromodomain-containing protein 2 OS=Homo sapiens OX=9606 GN=BRD2 PE=1 SV=2
sp|Q13905|RPGF1_HUMAN	0	1	77504	1	1	1	120547	Rap guanine nucleotide exchange factor 1 OS=Homo sapiens OX=9606 GN=RAPGEF1 PE=1 SV=3
sp|P78509|RELN_HUMAN	0	0	747690	1	1	1	388389	Reelin OS=Homo sapiens OX=9606 GN=RELN PE=1 SV=3
sp|Q8NDI1|EHBP1_HUMAN	0	1	1637700	1	1	1	140017	EH domain-binding protein 1 OS=Homo sapiens OX=9606 GN=EHBP1 PE=1 SV=3
tr|G8JLG1|G8JLG1_HUMAN	0	1	137280	1	1	1	140859	Structural maintenance of chromosomes protein OS=Homo sapiens OX=9606 GN=SMC1A PE=1 SV=2
tr|M0R088|M0R088_HUMAN	0	1	3464800	1	1	1	78140	Serine/arginine repetitive matrix protein 1 (Fragment) OS=Homo sapiens OX=9606 GN=SRRM1 PE=1 SV=1
sp|Q06278|AOXA_HUMAN	0	1	782460	1	1	1	147918	Aldehyde oxidase OS=Homo sapiens OX=9606 GN=AOX1 PE=1 SV=2
tr|Q5JTQ6|Q5JTQ6_HUMAN	0	4	574650	1	1	1	19503	Alpha-catulin OS=Homo sapiens OX=9606 GN=CTNNAL1 PE=1 SV=1
tr|H0YM74|H0YM74_HUMAN	0	1	88949	1	1	1	91982	Zinc finger protein 592 isoform CRA_b OS=Homo sapiens OX=9606 GN=ZNF592 PE=1 SV=1
sp|Q9ULH4|LRFN2_HUMAN	0	1	4787600	1	1	1	84731	Leucine-rich repeat and fibronectin type-III domain-containing protein 2 OS=Homo sapiens OX=9606 GN=LRFN2 PE=1 SV=2
sp|Q99250|SCN2A_HUMAN	0	1	1829900	1	1	1	227973	Sodium channel protein type 2 subunit alpha OS=Homo sapiens OX=9606 GN=SCN2A PE=1 SV=3
sp|Q86UK5|LBN_HUMAN	0	1	925530	1	1	1	147948	Limbin OS=Homo sapiens OX=9606 GN=EVC2 PE=1 SV=1
tr|H0Y4W2|H0Y4W2_HUMAN	0	0	313120	1	1	1	405921	Transformation/transcription domain-associated protein (Fragment) OS=Homo sapiens OX=9606 GN=TRRAP PE=1 SV=1
sp|O14647|CHD2_HUMAN	0	0	0	1	1	1	211342	Chromodomain-helicase-DNA-binding protein 2 OS=Homo sapiens OX=9606 GN=CHD2 PE=1 SV=2
tr|F6V2J0|F6V2J0_HUMAN	0	10	19327000	1	1	1	8578	Centrosomal protein of 162 kDa OS=Homo sapiens OX=9606 GN=CEP162 PE=1 SV=1
sp|Q9Y624|JAM1_HUMAN	0	10	761810	2	2	2	32583	Junctional adhesion molecule A OS=Homo sapiens OX=9606 GN=F11R PE=1 SV=1
tr|A0A0G2JP25|A0A0G2JP25_HUMAN	0	2	25636000	1	1	1	49292	Leukocyte immunoglobulin-like receptor subfamily B member 4 OS=Homo sapiens OX=9606 GN=LILRB4 PE=1 SV=1
tr|S4R400|S4R400_HUMAN	0	1	4237000	2	2	2	136373	Focadhesin OS=Homo sapiens OX=9606 GN=FOCAD PE=1 SV=2
sp|O96028|NSD2_HUMAN	0	1	49897000	2	2	2	152258	Histone-lysine N-methyltransferase NSD2 OS=Homo sapiens OX=9606 GN=NSD2 PE=1 SV=1
sp|P14406|CX7A2_HUMAN	0	20	3774900	2	2	2	9396	Cytochrome c oxidase subunit 7A2 mitochondrial OS=Homo sapiens OX=9606 GN=COX7A2 PE=1 SV=1
sp|Q9ULC8|ZDHC8_HUMAN	0	2	50817	1	1	1	81443	Probable palmitoyltransferase ZDHHC8 OS=Homo sapiens OX=9606 GN=ZDHHC8 PE=1 SV=3
sp|A3KMH1|VWA8_HUMAN	0	1	398290	2	2	2	214823	von Willebrand factor A domain-containing protein 8 OS=Homo sapiens OX=9606 GN=VWA8 PE=1 SV=2
sp|Q99832|TCPH_HUMAN	0	1	542790	1	1	1	59367	T-complex protein 1 subunit eta OS=Homo sapiens OX=9606 GN=CCT7 PE=1 SV=2
sp|P0DN76|U2AF5_HUMAN	0	3	0	1	1	1	27872	Splicing factor U2AF 35 kDa subunit-like protein OS=Homo sapiens OX=9606 GN=U2AF1L5 PE=1 SV=1
sp|O14686|KMT2D_HUMAN	0	0	0	1	1	1	593399	Histone-lysine N-methyltransferase 2D OS=Homo sapiens OX=9606 GN=KMT2D PE=1 SV=2
sp|Q14689|DIP2A_HUMAN	0	1	777470	1	1	1	170368	Disco-interacting protein 2 homolog A OS=Homo sapiens OX=9606 GN=DIP2A PE=1 SV=2
sp|Q9UJJ9|GNPTG_HUMAN	0	3	0	1	1	1	33974	N-acetylglucosamine-1-phosphotransferase subunit gamma OS=Homo sapiens OX=9606 GN=GNPTG PE=1 SV=1
sp|Q9Y5G5|PCDG8_HUMAN	0	1	2349200	1	1	1	101480	Protocadherin gamma-A8 OS=Homo sapiens OX=9606 GN=PCDHGA8 PE=2 SV=1
sp|P21817|RYR1_HUMAN	0	0	495060	1	1	1	565184	Ryanodine receptor 1 OS=Homo sapiens OX=9606 GN=RYR1 PE=1 SV=3
sp|Q6PK04|CC137_HUMAN	0	3	809990	1	1	1	33231	Coiled-coil domain-containing protein 137 OS=Homo sapiens OX=9606 GN=CCDC137 PE=1 SV=1
tr|F5GX09|F5GX09_HUMAN	0	2	370960	1	1	1	38621	Protein FAM76B OS=Homo sapiens OX=9606 GN=FAM76B PE=1 SV=1
sp|P48552|NRIP1_HUMAN	0	1	569100	1	1	1	126942	Nuclear receptor-interacting protein 1 OS=Homo sapiens OX=9606 GN=NRIP1 PE=1 SV=2
sp|Q9Y6E0|STK24_HUMAN	0	2	493520	1	1	1	49308	Serine/threonine-protein kinase 24 OS=Homo sapiens OX=9606 GN=STK24 PE=1 SV=1
sp|O94925|GLSK_HUMAN	0	2	382130	1	1	1	73461	Glutaminase kidney isoform mitochondrial OS=Homo sapiens OX=9606 GN=GLS PE=1 SV=1
sp|Q6ZTW0|TPGS1_HUMAN	0	3	12822000	1	1	2	31275	Tubulin polyglutamylase complex subunit 1 OS=Homo sapiens OX=9606 GN=TPGS1 PE=1 SV=2
tr|F5H6I7|F5H6I7_HUMAN	0	1	446440	1	1	1	58773	Atlastin-3 OS=Homo sapiens OX=9606 GN=ATL3 PE=1 SV=1
tr|F5H228|F5H228_HUMAN	0	1	148050	1	1	1	174902	Triple functional domain protein OS=Homo sapiens OX=9606 GN=TRIO PE=1 SV=1
tr|H0Y6T8|H0Y6T8_HUMAN	0	3	1622400	1	1	1	32983	Ras-related protein Rab-18 (Fragment) OS=Homo sapiens OX=9606 GN=RAB18 PE=1 SV=1
sp|Q3KP31|ZN791_HUMAN	0	2	7714500	1	1	1	66872	Zinc finger protein 791 OS=Homo sapiens OX=9606 GN=ZNF791 PE=2 SV=1
sp|Q14181|DPOA2_HUMAN	0	1	0	1	1	1	65948	DNA polymerase alpha subunit B OS=Homo sapiens OX=9606 GN=POLA2 PE=1 SV=2
sp|O95786|DDX58_HUMAN	0	1	427070	1	1	1	106600	Probable ATP-dependent RNA helicase DDX58 OS=Homo sapiens OX=9606 GN=DDX58 PE=1 SV=2
sp|Q9UQ35|SRRM2_HUMAN	0	0	4202000	1	1	1	299616	Serine/arginine repetitive matrix protein 2 OS=Homo sapiens OX=9606 GN=SRRM2 PE=1 SV=2
tr|F8WBW8|F8WBW8_HUMAN	0	0	1358500	1	1	1	276902	BAH and coiled-coil domain-containing protein 1 OS=Homo sapiens OX=9606 GN=BAHCC1 PE=1 SV=2
sp|Q15517|CDSN_HUMAN	0	2	576760	1	1	2	51522	Corneodesmosin OS=Homo sapiens OX=9606 GN=CDSN PE=1 SV=3
sp|Q8WVX9|FACR1_HUMAN	0	1	457460	1	1	1	59357	Fatty acyl-CoA reductase 1 OS=Homo sapiens OX=9606 GN=FAR1 PE=1 SV=1
sp|P06748|NPM_HUMAN	0	5	2765800	2	2	2	32575	Nucleophosmin OS=Homo sapiens OX=9606 GN=NPM1 PE=1 SV=2
sp|P00747|PLMN_HUMAN	0	1	0	1	1	1	90569	Plasminogen OS=Homo sapiens OX=9606 GN=PLG PE=1 SV=2
sp|Q96N66|MBOA7_HUMAN	0	3	0	1	1	1	52765	Lysophospholipid acyltransferase 7 OS=Homo sapiens OX=9606 GN=MBOAT7 PE=1 SV=2
tr|A0A087X0I6|A0A087X0I6_HUMAN	0	1	410500	1	1	1	89090	Non-specific serine/threonine protein kinase OS=Homo sapiens OX=9606 GN=MARK1 PE=1 SV=1
sp|Q5TGY3|AHDC1_HUMAN	0	0	2561800	1	1	1	168349	AT-hook DNA-binding motif-containing protein 1 OS=Homo sapiens OX=9606 GN=AHDC1 PE=1 SV=1
sp|O75592|MYCB2_HUMAN	0	0	644320	1	1	1	513643	E3 ubiquitin-protein ligase MYCBP2 OS=Homo sapiens OX=9606 GN=MYCBP2 PE=1 SV=4
sp|Q2YD98|UVSSA_HUMAN	0	2	5344500	1	1	1	80592	UV-stimulated scaffold protein A OS=Homo sapiens OX=9606 GN=UVSSA PE=1 SV=2
sp|Q9NQW1|SC31B_HUMAN	0	2	1387700	1	1	1	128697	Protein transport protein Sec31B OS=Homo sapiens OX=9606 GN=SEC31B PE=1 SV=1
sp|P13804|ETFA_HUMAN	0	3	254650	1	1	1	35080	Electron transfer flavoprotein subunit alpha mitochondrial OS=Homo sapiens OX=9606 GN=ETFA PE=1 SV=1
tr|H0Y307|H0Y307_HUMAN	0	1	107040	1	1	1	100663	Kinesin-like protein KIF13A (Fragment) OS=Homo sapiens OX=9606 GN=KIF13A PE=1 SV=1
sp|Q03252|LMNB2_HUMAN	0	2	77893	1	1	1	69948	Lamin-B2 OS=Homo sapiens OX=9606 GN=LMNB2 PE=1 SV=4
tr|H0Y507|H0Y507_HUMAN	0	1	9838400	1	1	1	116487	SH3 and PX domain-containing protein 2A (Fragment) OS=Homo sapiens OX=9606 GN=SH3PXD2A PE=1 SV=1
sp|Q6IA86|ELP2_HUMAN	0	1	2429900	1	1	1	92500	Elongator complex protein 2 OS=Homo sapiens OX=9606 GN=ELP2 PE=1 SV=2
sp|Q7Z7M0|MEGF8_HUMAN	0	0	13116000	1	1	1	303100	Multiple epidermal growth factor-like domains protein 8 OS=Homo sapiens OX=9606 GN=MEGF8 PE=1 SV=2
sp|Q9H321|VCX3B_HUMAN	0	5	475520	1	1	1	26878	Variable charge X-linked protein 3B OS=Homo sapiens OX=9606 GN=VCX3B PE=2 SV=4
tr|G5E9N2|G5E9N2_HUMAN	0	3	8965000	1	1	1	74959	Trophinin isoform CRA_c OS=Homo sapiens OX=9606 GN=TRO PE=1 SV=1
sp|Q8IUC8|GLT13_HUMAN	0	1	1630600	1	1	1	64051	Polypeptide N-acetylgalactosaminyltransferase 13 OS=Homo sapiens OX=9606 GN=GALNT13 PE=2 SV=2
tr|E9PCM6|E9PCM6_HUMAN	0	1	1139800	1	1	1	85381	Rho GTPase-activating protein 4 OS=Homo sapiens OX=9606 GN=ARHGAP4 PE=1 SV=1
sp|P38159|RBMX_HUMAN	0	2	329020000	1	1	1	42332	RNA-binding motif protein X chromosome OS=Homo sapiens OX=9606 GN=RBMX PE=1 SV=3
sp|Q9H0I9|TKTL2_HUMAN	0	1	82454000	1	1	1	67877	Transketolase-like protein 2 OS=Homo sapiens OX=9606 GN=TKTL2 PE=2 SV=1
sp|Q9NU02|ANKE1_HUMAN	0	1	3945200	1	1	1	86664	Ankyrin repeat and EF-hand domain-containing protein 1 OS=Homo sapiens OX=9606 GN=ANKEF1 PE=2 SV=2
sp|Q8TDZ2|MICA1_HUMAN	0	1	0	1	1	1	117875	[F-actin]-monooxygenase MICAL1 OS=Homo sapiens OX=9606 GN=MICAL1 PE=1 SV=2
sp|Q96IK1|BOD1_HUMAN	0	11	278810	1	1	1	19196	Biorientation of chromosomes in cell division protein 1 OS=Homo sapiens OX=9606 GN=BOD1 PE=1 SV=2
tr|X6R549|X6R549_HUMAN	0	1	0	1	1	1	66327	Transcription factor COE4 (Fragment) OS=Homo sapiens OX=9606 GN=EBF4 PE=1 SV=1
sp|Q6ZPD9|D19L3_HUMAN	0	1	559180	1	1	1	83197	Probable C-mannosyltransferase DPY19L3 OS=Homo sapiens OX=9606 GN=DPY19L3 PE=2 SV=1
sp|Q96C36|P5CR2_HUMAN	0	5	172000	1	1	1	33637	Pyrroline-5-carboxylate reductase 2 OS=Homo sapiens OX=9606 GN=PYCR2 PE=1 SV=1
sp|P00414|COX3_HUMAN	0	5	0	1	1	1	29951	Cytochrome c oxidase subunit 3 OS=Homo sapiens OX=9606 GN=MT-CO3 PE=1 SV=2
sp|Q8IUK8|CBLN2_HUMAN	0	3	144870000	1	1	1	24084	Cerebellin-2 OS=Homo sapiens OX=9606 GN=CBLN2 PE=2 SV=1
tr|Q5T091|Q5T091_HUMAN	0	5	674370	1	1	1	21024	Protein RER1 OS=Homo sapiens OX=9606 GN=RER1 PE=1 SV=1
tr|F2Z2B1|F2Z2B1_HUMAN	0	11	245080	1	1	1	20277	Choline-phosphate cytidylyltransferase B OS=Homo sapiens OX=9606 GN=PCYT1B PE=1 SV=1
sp|P20645|MPRD_HUMAN	0	5	456150	1	1	1	30993	Cation-dependent mannose-6-phosphate receptor OS=Homo sapiens OX=9606 GN=M6PR PE=1 SV=1
sp|Q9HC58|NCKX3_HUMAN	0	1	719400	1	1	1	71992	Sodium/potassium/calcium exchanger 3 OS=Homo sapiens OX=9606 GN=SLC24A3 PE=2 SV=4
sp|Q9Y5Z7|HCFC2_HUMAN	0	1	24362000	1	1	1	86779	Host cell factor 2 OS=Homo sapiens OX=9606 GN=HCFC2 PE=1 SV=1
sp|P04049|RAF1_HUMAN	0	2	458430	1	1	1	73052	RAF proto-oncogene serine/threonine-protein kinase OS=Homo sapiens OX=9606 GN=RAF1 PE=1 SV=1
sp|Q8N9M5|TM102_HUMAN	0	2	113420	1	1	1	54175	Transmembrane protein 102 OS=Homo sapiens OX=9606 GN=TMEM102 PE=1 SV=1
sp|P11137|MTAP2_HUMAN	0	0	1792800	1	1	1	199525	Microtubule-associated protein 2 OS=Homo sapiens OX=9606 GN=MAP2 PE=1 SV=4
sp|Q86V81|THOC4_HUMAN	0	4	820440	1	1	1	26888	THO complex subunit 4 OS=Homo sapiens OX=9606 GN=ALYREF PE=1 SV=3
sp|Q8NFQ8|TOIP2_HUMAN	0	2	360040	1	1	1	51263	Torsin-1A-interacting protein 2 OS=Homo sapiens OX=9606 GN=TOR1AIP2 PE=1 SV=1
tr|A0A087WUL9|A0A087WUL9_HUMAN	0	3	73402	1	1	1	42739	26S proteasome non-ATPase regulatory subunit 13 OS=Homo sapiens OX=9606 GN=PSMD13 PE=1 SV=1
sp|Q8TAA3|PSMA8_HUMAN	0	4	193940	1	1	1	28530	Proteasome subunit alpha-type 8 OS=Homo sapiens OX=9606 GN=PSMA8 PE=2 SV=3
tr|A0A3B3IU95|A0A3B3IU95_HUMAN	0	2	0	1	1	1	40844	Cytochrome P450 2J2 OS=Homo sapiens OX=9606 GN=CYP2J2 PE=1 SV=1
tr|A0A087WUA0|A0A087WUA0_HUMAN	0	3	1674900	1	1	1	33005	Fibrinogen alpha chain OS=Homo sapiens OX=9606 GN=FGA PE=1 SV=1
tr|A0A3B3IS06|A0A3B3IS06_HUMAN	0	1	211810	1	1	1	138691	Treacle protein (Fragment) OS=Homo sapiens OX=9606 GN=TCOF1 PE=1 SV=1
tr|H7C175|H7C175_HUMAN	0	1	190350	1	1	1	133847	Serine/threonine-protein kinase LMTK1 OS=Homo sapiens OX=9606 GN=AATK PE=1 SV=2
sp|Q99959|PKP2_HUMAN	0	1	371600	1	1	1	97415	Plakophilin-2 OS=Homo sapiens OX=9606 GN=PKP2 PE=1 SV=2
tr|A0A1W2PNT6|A0A1W2PNT6_HUMAN	0	6	810040	1	1	1	19007	Adaptin ear-binding coat-associated protein 1 OS=Homo sapiens OX=9606 GN=NECAP1 PE=1 SV=1
sp|Q2M2H8|MGAL_HUMAN	0	0	625650	1	1	1	277989	Probable maltase-glucoamylase 2 OS=Homo sapiens OX=9606 GN=MGAM2 PE=2 SV=3
tr|K7ES92|K7ES92_HUMAN	0	1	146050	1	1	1	84623	Rho GTPase-activating protein 45 OS=Homo sapiens OX=9606 GN=ARHGAP45 PE=1 SV=1
sp|Q4G163|FBX43_HUMAN	0	4	669760	1	1	1	78402	F-box only protein 43 OS=Homo sapiens OX=9606 GN=FBXO43 PE=1 SV=3
tr|E7ES00|E7ES00_HUMAN	0	1	8030600	1	1	1	86681	Axin-2 OS=Homo sapiens OX=9606 GN=AXIN2 PE=1 SV=2
tr|A0A2R8Y6F8|A0A2R8Y6F8_HUMAN	0	1	280830	1	1	1	102840	Peripheral plasma membrane protein CASK OS=Homo sapiens OX=9606 GN=CASK PE=1 SV=1
tr|B5MCT7|B5MCT7_HUMAN	0	3	1072900	1	1	1	31263	Protein phosphatase 1F (PP2C domain containing) isoform CRA_a OS=Homo sapiens OX=9606 GN=PPM1F PE=1 SV=1
tr|Q5QPQ1|Q5QPQ1_HUMAN	0	5	0	1	1	1	17517	Acyl-protein thioesterase 2 (Fragment) OS=Homo sapiens OX=9606 GN=LYPLA2 PE=1 SV=1
tr|F5GWJ5|F5GWJ5_HUMAN	0	1	0	1	1	1	146056	Roundabout homolog 3 OS=Homo sapiens OX=9606 GN=ROBO3 PE=1 SV=1
sp|A0A075B6J6|LV322_HUMAN	0	14	6186500	1	1	1	12549	Immunoglobulin lambda variable 3-22 OS=Homo sapiens OX=9606 GN=IGLV3-22 PE=3 SV=1
tr|A0A0D9SGA5|A0A0D9SGA5_HUMAN	0	10	13864000	1	1	1	6092	Solute carrier family 12 member 5 (Fragment) OS=Homo sapiens OX=9606 GN=SLC12A5 PE=4 SV=1
tr|G3V3A1|G3V3A1_HUMAN	0	3	6913400	1	1	1	29152	Ubiquinone biosynthesis monooxygenase COQ6 mitochondrial (Fragment) OS=Homo sapiens OX=9606 GN=COQ6 PE=1 SV=1
sp|Q8N1S5|S39AB_HUMAN	0	5	641050	1	1	1	35396	Zinc transporter ZIP11 OS=Homo sapiens OX=9606 GN=SLC39A11 PE=2 SV=3
sp|P05089|ARGI1_HUMAN	0	3	227860	1	1	1	34735	Arginase-1 OS=Homo sapiens OX=9606 GN=ARG1 PE=1 SV=2
tr|E7ESC6|E7ESC6_HUMAN	0	1	351460	1	1	1	124066	Exportin-7 OS=Homo sapiens OX=9606 GN=XPO7 PE=1 SV=1
sp|Q9BVJ7|DUS23_HUMAN	0	5	342930	1	1	1	16588	Dual specificity protein phosphatase 23 OS=Homo sapiens OX=9606 GN=DUSP23 PE=1 SV=1
tr|A0A1B0GVM0|A0A1B0GVM0_HUMAN	0	1	226640	1	1	1	87674	Brain-enriched guanylate kinase-associated protein OS=Homo sapiens OX=9606 GN=BEGAIN PE=1 SV=1
sp|Q6P499|NPAL3_HUMAN	0	2	11594000	1	1	1	44742	NIPA-like protein 3 OS=Homo sapiens OX=9606 GN=NIPAL3 PE=1 SV=1
sp|P03915|NU5M_HUMAN	0	1	1218300	1	1	1	67027	NADH-ubiquinone oxidoreductase chain 5 OS=Homo sapiens OX=9606 GN=MT-ND5 PE=1 SV=2
sp|O43493|TGON2_HUMAN	0	1	0	1	1	1	51019	Trans-Golgi network integral membrane protein 2 OS=Homo sapiens OX=9606 GN=TGOLN2 PE=1 SV=3
tr|J3QTB1|J3QTB1_HUMAN	0	6	4316800	1	1	1	28161	Stimulator of interferon genes protein (Fragment) OS=Homo sapiens OX=9606 GN=TMEM173 PE=1 SV=1
tr|H0YM15|H0YM15_HUMAN	0	2	0	1	1	1	39318	Family with sequence similarity 63 member B isoform CRA_e OS=Homo sapiens OX=9606 GN=MINDY2 PE=1 SV=1
tr|C9J388|C9J388_HUMAN	0	9	541050	1	1	1	10794	Polypeptide N-acetylgalactosaminyltransferase 3 (Fragment) OS=Homo sapiens OX=9606 GN=GALNT3 PE=1 SV=1
sp|Q14191|WRN_HUMAN	0	2	446450	1	1	1	162460	Werner syndrome ATP-dependent helicase OS=Homo sapiens OX=9606 GN=WRN PE=1 SV=2
sp|Q86WR7|PRSR2_HUMAN	0	2	36378000	1	1	1	45802	Proline and serine-rich protein 2 OS=Homo sapiens OX=9606 GN=PROSER2 PE=1 SV=2
tr|H0YI41|H0YI41_HUMAN	0	5	991020	1	1	1	16331	Histone deacetylase 7 (Fragment) OS=Homo sapiens OX=9606 GN=HDAC7 PE=1 SV=1
tr|F2Z2Q7|F2Z2Q7_HUMAN	0	1	8935000	1	1	1	62961	Protein AKNAD1 OS=Homo sapiens OX=9606 GN=AKNAD1 PE=4 SV=1
sp|Q7LBC6|KDM3B_HUMAN	0	0	0	1	1	1	191580	Lysine-specific demethylase 3B OS=Homo sapiens OX=9606 GN=KDM3B PE=1 SV=2
sp|Q8IX07|FOG1_HUMAN	0	2	234880	1	1	1	104888	Zinc finger protein ZFPM1 OS=Homo sapiens OX=9606 GN=ZFPM1 PE=1 SV=2
sp|Q96MZ4|F218A_HUMAN	0	4	171290000	1	1	1	17021	Protein FAM218A OS=Homo sapiens OX=9606 GN=FAM218A PE=1 SV=1
sp|E9PQR5|NPIB8_HUMAN	0	2	258470	1	1	1	49617	Nuclear pore complex-interacting protein family member B8 OS=Homo sapiens OX=9606 GN=NPIPB8 PE=3 SV=1
sp|Q9H1C4|UN93B_HUMAN	0	1	8020100	1	1	1	66631	Protein unc-93 homolog B1 OS=Homo sapiens OX=9606 GN=UNC93B1 PE=1 SV=2
sp|Q70SY1|CR3L2_HUMAN	0	1	951570	1	1	1	57415	Cyclic AMP-responsive element-binding protein 3-like protein 2 OS=Homo sapiens OX=9606 GN=CREB3L2 PE=1 SV=3
sp|Q2NL67|PARP6_HUMAN	0	4	258730	1	1	1	71115	Protein mono-ADP-ribosyltransferase PARP6 OS=Homo sapiens OX=9606 GN=PARP6 PE=1 SV=1
tr|J3KN75|J3KN75_HUMAN	0	1	541080	1	1	1	128108	TBC1 domain family member 8B OS=Homo sapiens OX=9606 GN=TBC1D8B PE=1 SV=1
sp|O95199|RCBT2_HUMAN	0	3	1106500	1	1	1	60315	RCC1 and BTB domain-containing protein 2 OS=Homo sapiens OX=9606 GN=RCBTB2 PE=1 SV=1
sp|Q96L03|SPT17_HUMAN	0	8	2231100	1	1	1	43499	Spermatogenesis-associated protein 17 OS=Homo sapiens OX=9606 GN=SPATA17 PE=2 SV=1
sp|P57103|NAC3_HUMAN	0	1	206920	1	1	1	103010	Sodium/calcium exchanger 3 OS=Homo sapiens OX=9606 GN=SLC8A3 PE=1 SV=2
sp|P32455|GBP1_HUMAN	0	2	5149400	1	1	1	67931	Guanylate-binding protein 1 OS=Homo sapiens OX=9606 GN=GBP1 PE=1 SV=2
sp|Q9ULR3|PPM1H_HUMAN	0	2	196410	1	1	1	56448	Protein phosphatase 1H OS=Homo sapiens OX=9606 GN=PPM1H PE=1 SV=2
sp|O43314|VIP2_HUMAN	0	1	371500	1	1	1	140406	Inositol hexakisphosphate and diphosphoinositol-pentakisphosphate kinase 2 OS=Homo sapiens OX=9606 GN=PPIP5K2 PE=1 SV=3
sp|Q96F05|CK024_HUMAN	0	2	1223400	1	1	1	46101	Uncharacterized protein C11orf24 OS=Homo sapiens OX=9606 GN=C11orf24 PE=1 SV=2
sp|O95259|KCNH1_HUMAN	0	1	0	1	1	1	111423	Potassium voltage-gated channel subfamily H member 1 OS=Homo sapiens OX=9606 GN=KCNH1 PE=1 SV=1
sp|P57740|NU107_HUMAN	0	1	2423900	1	1	1	106374	Nuclear pore complex protein Nup107 OS=Homo sapiens OX=9606 GN=NUP107 PE=1 SV=1
tr|H0Y9Y0|H0Y9Y0_HUMAN	0	1	1821300	1	1	1	69044	F-box/LRR-repeat protein 5 (Fragment) OS=Homo sapiens OX=9606 GN=FBXL5 PE=1 SV=1
sp|Q93008|USP9X_HUMAN	0	0	2100500	1	1	1	292278	Probable ubiquitin carboxyl-terminal hydrolase FAF-X OS=Homo sapiens OX=9606 GN=USP9X PE=1 SV=3
