# Supplementary material for: CRB3 navigates Rab11 trafficking vesicles to promote γTuRC assembly during ciliogenesis
Source: bioRxiv preprint, doi:10.1101/2023.02.15.528649, version 5 (2023-09-04)
Supplement: Supplementary File 1 [file 528649_file18.docx]

**Supplementary File 1.** The sequences of primer pairs used in real-time PCR

| **Gene** |  | **Sequence (5’-3-)** |
| --- | --- | --- |
| *CRB3* | F | CTTCTGCAAATGAGAATAGCACTG |
| R | GAAGACCACGATGATAGCAGTGA |
| *Crb3* | F | CACCGGACCCTTTCACAAATA |
| R | CCCACTGCTATAAGGAGGACT |
| *CEP350* (CAP350) | F | ATCGTGTGGAATTTCGTGAACC |
| R | TCCGTTCTTCTCGACTGCCTA |
| *TUBG1* (γ-tubulin) | F | AGCTGGTGTCTACCATCATGT |
| R | CGTAGTGAGAGGGGTGTAGC |
| *ARL13B* | F | ATGTTCAGCAATCTCGGGGTA |
| R | TGTCTCTTTTTGGATGCGTTCAT |
| *TTBK2* | F | CAATCAACGCACATCGGAACA |
| R | GAGCCTACTTGCTCCTTGTCC |
| *CCP110* (CP110) | F | AGACGCAGTCTGAGAGGTAGT |
| R | CAGTGTTTGCCTGTCAACTGG |
| *CEP164* | F | GTTCCTCATTAGCCCCAGTTC |
| R | AGGCTCACGCTTTGAGATCC |
| *FBF1* | F | TCAGAACAGGAGGTTTTCCTCT |
| R | GGGGCTCTTGTCAGAAGCTG |
| *SCLT1* | F | AGCCAAATTAGAGCTGAGAGTTG |
| R | CAGACACCACATCCTTCTCCT |
| *ODF2* | F | TGGAGGCGGAAATGGATGG |
| R | CCTTGTCAGGGTGTTGATGTC |
| *IFT140* | F | TCCATTCTTGGCAGTTGCTTAC |
| R | CTCTCGACGTGTGTATCTGGC |
| *RAB11A* (RAB11) | F | CAACAAGAAGCATCCAGGTTGA |
| R | GCACCTACAGCTCCACGATAAT |
| *GLI1* | F | AGCGTGAGCCTGAATCTGTG |
| R | CAGCATGTACTGGGCTTTGAA |
| *GAPDH* | F | CTGGGCTACACTGAGCACC |
| R | AAGTGGTCGTTGAGGGCAATG |
| *Gapdh* | F | AGGTCGGTGTGAACGGATTTG |
| R | TGTAGACCATGTAGTTGAGGTCA |
